# Supplementary material for: Laser capture microdissection coupled mass spectrometry (LCM-MS) for spatially resolved analysis of formalin-fixed and stained human lung tissues
Source: Clin Proteomics. 2020 Jun 17;17:24. doi: 10.1186/s12014-020-09287-6 (PMC7302139; doi:10.1186/s12014-020-09287-6)
Supplement: Supplementary file 3 — Additional file 3. BayesENproteomic analysis of proteins expressed between morphologically normal alveoli and blood vessels. [file 12014_2020_9287_MOESM3_ESM.xlsx]

## Sheet: Sheet1
Identifier (Human)	# Peptides	Gene Name	Protein Name	Log(2) fold-change blood vessels vs. alveoli	FDR-adjusted p-value of alveoli ≠ blood vessels
SMTN_HUMAN	12	SMTN SMSMO	Smoothelin	5.63625	1.64737e-14
MYPT2_HUMAN	3	PPP1R12B MYPT2	Protein phosphatase 1 regulatory subunit 12B (Myosin phosphatase-targeting subunit 2) (Myosin phosphatase target subunit 2)	5.42733	8.19312e-12
DMD_HUMAN	15	DMD	Dystrophin	4.78223	1.64737e-14
CNN1_HUMAN	17	CNN1	Calponin-1 (Basic calponin) (Calponin H1, smooth muscle)	4.73052	1.64737e-14
LMOD1_HUMAN	14	LMOD1	Leiomodin-1 (64 kDa autoantigen 1D) (64 kDa autoantigen 1D3) (64 kDa autoantigen D1) (Leiomodin, muscle form) (Smooth muscle leiomodin) (SM-Lmod) (Thyroid-associated ophthalmopathy autoantigen)	4.70664	1.64737e-14
SYUG_HUMAN	5	SNCG BCSG1 PERSYN PRSN	Gamma-synuclein (Breast cancer-specific gene 1 protein) (Persyn) (Synoretin) (SR)	4.47774	2.07816e-14
MYL9_HUMAN	4	MYL9 MLC2 MRLC1 MYRL2	Myosin regulatory light polypeptide 9 (20 kDa myosin light chain) (LC20) (MLC-2C) (Myosin RLC) (Myosin regulatory light chain 2, smooth muscle isoform) (Myosin regulatory light chain 9) (Myosin regulatory light chain MRLC1)	4.44509	1.8e-14
FLNC_HUMAN	42	FLNC ABPL FLN2	Filamin-C (FLN-C) (FLNc) (ABP-280-like protein) (ABP-L) (Actin-binding-like protein) (Filamin-2) (Gamma-filamin)	4.38026	1.64737e-14
ELN_HUMAN	10	ELN	Elastin (Tropoelastin)	4.32221	1.64737e-14
PTGIS_HUMAN	8	PTGIS CYP8 CYP8A1	Prostacyclin synthase (EC 5.3.99.4) (Prostaglandin I2 synthase)	4.3159	1.33714e-13
ITA7_HUMAN	6	ITGA7 UNQ406/PRO768	Integrin alpha-7 [Cleaved into: Integrin alpha-7 heavy chain; Integrin alpha-7 light chain; Integrin alpha-7 70 kDa form]	4.30125	4.53684e-14
CO8A2_HUMAN	3	COL8A2	Collagen alpha-2(VIII) chain (Endothelial collagen)	4.30089	1.69358e-09
SYNP2_HUMAN	10	SYNPO2	Synaptopodin-2 (Genethonin-2) (Myopodin)	4.17488	1.64737e-14
V9HW25_HUMAN	5			4.11377	2.07816e-14
PGM5_HUMAN	20	PGM5 PGMRP	Phosphoglucomutase-like protein 5 (Aciculin) (Phosphoglucomutase-related protein) (PGM-RP)	4.11376	1.64737e-14
JPH2_HUMAN	3	JPH2 JP2	Junctophilin-2 (JP-2) (Junctophilin type 2) [Cleaved into: Junctophilin-2 N-terminal fragment (JP2NT)]	4.09276	6.75113e-09
TAGL_HUMAN	28	TAGLN SM22 WS3-10	Transgelin (22 kDa actin-binding protein) (Protein WS3-10) (Smooth muscle protein 22-alpha) (SM22-alpha)	4.08543	2.34382e-14
CAD13_HUMAN	6	CDH13 CDHH	Cadherin-13 (Heart cadherin) (H-cadherin) (P105) (Truncated cadherin) (T-cad) (T-cadherin)	4.07951	1.64737e-14
SLMAP_HUMAN	13	SLMAP KIAA1601 SLAP UNQ1847/PRO3577	Sarcolemmal membrane-associated protein (Sarcolemmal-associated protein)	3.9397	1.64737e-14
COEA1_HUMAN	51	COL14A1 UND	Collagen alpha-1(XIV) chain (Undulin)	3.92318	1.64737e-14
SRBS2_HUMAN	6	SORBS2 ARGBP2 KIAA0777	Sorbin and SH3 domain-containing protein 2 (Arg-binding protein 2) (ArgBP2) (Arg/Abl-interacting protein 2) (Sorbin)	3.91213	1.64737e-14
MAP1B_HUMAN	12	MAP1B	Microtubule-associated protein 1B (MAP-1B) [Cleaved into: MAP1B heavy chain; MAP1 light chain LC1]	3.90908	1.64737e-14
SRBS1_HUMAN	25	SORBS1 KIAA0894 KIAA1296 SH3D5	Sorbin and SH3 domain-containing protein 1 (Ponsin) (SH3 domain protein 5) (SH3P12) (c-Cbl-associated protein) (CAP)	3.9048	5.30534e-12
MFGM_HUMAN	18	MFGE8	Lactadherin (Breast epithelial antigen BA46) (HMFG) (MFGM) (Milk fat globule-EGF factor 8) (MFG-E8) (SED1) [Cleaved into: Lactadherin short form; Medin]	3.86541	5.76034e-13
PGCA_HUMAN	11	ACAN AGC1 CSPG1 MSK16	Aggrecan core protein (Cartilage-specific proteoglycan core protein) (CSPCP) (Chondroitin sulfate proteoglycan core protein 1) (Chondroitin sulfate proteoglycan 1) [Cleaved into: Aggrecan core protein 2]	3.85658	1.64737e-14
MYH11_HUMAN	145	MYH11 KIAA0866	Myosin-11 (Myosin heavy chain 11) (Myosin heavy chain, smooth muscle isoform) (SMMHC)	3.85596	1.64737e-14
LOXL1_HUMAN	4	LOXL1 LOXL	Lysyl oxidase homolog 1 (EC 1.4.3.-) (Lysyl oxidase-like protein 1) (LOL)	3.75436	1.18711e-12
PDLI3_HUMAN	4	PDLIM3 ALP	PDZ and LIM domain protein 3 (Actinin-associated LIM protein) (Alpha-actinin-2-associated LIM protein)	3.62824	1.30996e-11
TARSH_HUMAN	12	ABI3BP NESHBP TARSH	Target of Nesh-SH3 (Tarsh) (ABI gene family member 3-binding protein) (Nesh-binding protein) (NeshBP)	3.59498	1.64737e-14
FMOD_HUMAN	3	FMOD FM SLRR2E	Fibromodulin (FM) (Collagen-binding 59 kDa protein) (Keratan sulfate proteoglycan fibromodulin) (KSPG fibromodulin)	3.56828	3.00855e-09
ITA8_HUMAN	4	ITGA8	Integrin alpha-8 [Cleaved into: Integrin alpha-8 heavy chain; Integrin alpha-8 light chain]	3.55984	3.35589e-09
CO9_HUMAN	15	C9	Complement component C9 [Cleaved into: Complement component C9a; Complement component C9b]	3.54706	4.7288e-11
CRYAB_HUMAN	10	CRYAB CRYA2 HSPB5	Alpha-crystallin B chain (Alpha(B)-crystallin) (Heat shock protein beta-5) (HspB5) (Renal carcinoma antigen NY-REN-27) (Rosenthal fiber component)	3.5325	1.64737e-14
DESM_HUMAN	36	DES	Desmin	3.51684	1.64737e-14
SRPX_HUMAN	4	SRPX ETX1	Sushi repeat-containing protein SRPX	3.51061	1.86519e-12
CO1A2_HUMAN	81	COL1A2	Collagen alpha-2(I) chain (Alpha-2 type I collagen)	3.50251	1.64737e-14
B1AHL2_HUMAN	6	FBLN1	Fibulin-1	3.48538	1.23989e-12
CO1A1_HUMAN	88	COL1A1	Collagen alpha-1(I) chain (Alpha-1 type I collagen)	3.48162	1.64737e-14
COGA1_HUMAN	4	COL16A1 FP1572	Collagen alpha-1(XVI) chain	3.47953	1.64737e-14
HSPB6_HUMAN	8	HSPB6	Heat shock protein beta-6 (HspB6) (Heat shock 20 kDa-like protein p20)	3.45823	4.11461e-12
PYGM_HUMAN	3	PYGM	Glycogen phosphorylase, muscle form (EC 2.4.1.1) (Myophosphorylase)	3.33152	7.88179e-09
COIA1_HUMAN	20	COL18A1	Collagen alpha-1(XVIII) chain [Cleaved into: Endostatin; Non-collagenous domain 1 (NC1)]	3.30379	1.64737e-14
COLA1_HUMAN	3	COL21A1 COL1AL FP633	Collagen alpha-1(XXI) chain	3.29783	2.81815e-09
CO5A2_HUMAN	25	COL5A2	Collagen alpha-2(V) chain	3.25191	1.64737e-14
FBLN2_HUMAN	8	FBLN2	Fibulin-2 (FIBL-2)	3.25066	1.64737e-14
AL1B1_HUMAN	17	ALDH1B1 ALDH5 ALDHX	Aldehyde dehydrogenase X, mitochondrial (EC 1.2.1.3) (Aldehyde dehydrogenase 5) (Aldehyde dehydrogenase family 1 member B1)	3.24396	1.8e-14
HTRA1_HUMAN	3	HTRA1 HTRA PRSS11	Serine protease HTRA1 (EC 3.4.21.-) (High-temperature requirement A serine peptidase 1) (L56) (Serine protease 11)	3.2433	2.20766e-07
PGBM_HUMAN	78	HSPG2	Basement membrane-specific heparan sulfate proteoglycan core protein (HSPG) (Perlecan) (PLC) [Cleaved into: Endorepellin; LG3 peptide]	3.23621	1.64737e-14
CLUS_HUMAN	14	CLU APOJ CLI KUB1 AAG4	Clusterin (Aging-associated gene 4 protein) (Apolipoprotein J) (Apo-J) (Complement cytolysis inhibitor) (CLI) (Complement-associated protein SP-40,40) (Ku70-binding protein 1) (NA1/NA2) (Testosterone-repressed prostate message 2) (TRPM-2) [Cleaved into: Clusterin beta chain (ApoJalpha) (Complement cytolysis inhibitor a chain); Clusterin alpha chain (ApoJbeta) (Complement cytolysis inhibitor b cha…	3.20295	1.64737e-14
H0Y9Y3_HUMAN	3	SYNPO2	Synaptopodin-2 (Fragment)	3.17727	1.92158e-08
PDLI5_HUMAN	5	PDLIM5 ENH L9	PDZ and LIM domain protein 5 (Enigma homolog) (Enigma-like PDZ and LIM domains protein)	3.16181	2.56956e-14
CSPG2_HUMAN	16	VCAN CSPG2	Versican core protein (Chondroitin sulfate proteoglycan core protein 2) (Chondroitin sulfate proteoglycan 2) (Glial hyaluronate-binding protein) (GHAP) (Large fibroblast proteoglycan) (PG-M)	3.15452	3.69787e-14
PGS1_HUMAN	13	BGN SLRR1A	Biglycan (Bone/cartilage proteoglycan I) (PG-S1)	3.14965	1.47597e-06
CALD1_HUMAN	35	CALD1 CAD CDM	Caldesmon (CDM)	3.14467	1.64737e-14
MIME_HUMAN	11	OGN OIF SLRR3A	Mimecan (Osteoglycin) (Osteoinductive factor) (OIF)	3.14058	4.24261e-13
CO4A1_HUMAN	9	COL4A1	Collagen alpha-1(IV) chain [Cleaved into: Arresten]	3.12744	1.64737e-14
MUC18_HUMAN	10	MCAM MUC18	Cell surface glycoprotein MUC18 (Cell surface glycoprotein P1H12) (Melanoma cell adhesion molecule) (Melanoma-associated antigen A32) (Melanoma-associated antigen MUC18) (S-endo 1 endothelial-associated antigen) (CD antigen CD146)	3.11344	1.64737e-14
CAP2_HUMAN	3	CAP2	Adenylyl cyclase-associated protein 2 (CAP 2)	3.10097	3.02399e-09
PDLI7_HUMAN	11	PDLIM7 ENIGMA	PDZ and LIM domain protein 7 (LIM mineralization protein) (LMP) (Protein enigma)	3.03511	1.64737e-14
D3DTX7_HUMAN	3			3.0348	4.90486e-12
HSPB7_HUMAN	3	HSPB7 CVHSP	Heat shock protein beta-7 (HspB7) (Cardiovascular heat shock protein) (cvHsp)	3.02979	1.61673e-09
COBA1_HUMAN	3	COL11A1 COLL6	Collagen alpha-1(XI) chain	3.02957	1.64737e-14
LPP_HUMAN	12	LPP	Lipoma-preferred partner (LIM domain-containing preferred translocation partner in lipoma)	2.98828	1.64737e-14
CO4A2_HUMAN	24	COL4A2	Collagen alpha-2(IV) chain [Cleaved into: Canstatin]	2.97752	1.64737e-14
CO3A1_HUMAN	82	COL3A1	Collagen alpha-1(III) chain	2.96644	1.64737e-14
TPM2_HUMAN	14	TPM2 TMSB	Tropomyosin beta chain (Beta-tropomyosin) (Tropomyosin-2)	2.90746	1.64737e-14
NEXN_HUMAN	8	NEXN	Nexilin (F-actin-binding protein) (Nelin)	2.86693	1.01754e-11
MFAP4_HUMAN	6	MFAP4	Microfibril-associated glycoprotein 4	2.84567	1.0287e-11
COFA1_HUMAN	10	COL15A1	Collagen alpha-1(XV) chain [Cleaved into: Restin (Endostatin-XV) (Related to endostatin) (Restin-I); Restin-2 (Restin-II); Restin-3 (Restin-III); Restin-4 (Restin-IV)]	2.84452	3.93842e-13
PALLD_HUMAN	13	PALLD KIAA0992 CGI-151	Palladin (SIH002) (Sarcoma antigen NY-SAR-77)	2.84228	1.8e-14
FBLN3_HUMAN	7	EFEMP1 FBLN3 FBNL	EGF-containing fibulin-like extracellular matrix protein 1 (Extracellular protein S1-5) (Fibrillin-like protein) (Fibulin-3) (FIBL-3)	2.80612	2.05227e-07
CAVN3_HUMAN	11	CAVIN3 PRKCDBP SRBC	Caveolae-associated protein 3 (Cavin-3) (Protein kinase C delta-binding protein) (Serum deprivation response factor-related gene product that binds to C-kinase) (hSRBC)	2.79832	1.8e-14
B4E2F9_HUMAN	3			2.78938	1.12538e-07
CILP1_HUMAN	3	CILP UNQ602/PRO1188	Cartilage intermediate layer protein 1 (CILP-1) (Cartilage intermediate-layer protein) [Cleaved into: Cartilage intermediate layer protein 1 C1; Cartilage intermediate layer protein 1 C2]	2.77985	1.95668e-07
CO8A1_HUMAN	10	COL8A1 C3orf7	Collagen alpha-1(VIII) chain (Endothelial collagen) [Cleaved into: Vastatin]	2.76764	1.64737e-14
PDLI4_HUMAN	3	PDLIM4 RIL	PDZ and LIM domain protein 4 (LIM protein RIL) (Reversion-induced LIM protein)	2.72339	6.77618e-07
CO2A1_HUMAN	3	COL2A1	Collagen alpha-1(II) chain (Alpha-1 type II collagen) [Cleaved into: Collagen alpha-1(II) chain; Chondrocalcin]	2.6988	1.70245e-10
ITIH5_HUMAN	3	ITIH5 KIAA1953 PP14776 UNQ311/PRO354	Inter-alpha-trypsin inhibitor heavy chain H5 (ITI heavy chain H5) (ITI-HC5) (Inter-alpha-inhibitor heavy chain 5)	2.67918	3.79309e-07
FINC_HUMAN	66	FN1 FN	Fibronectin (FN) (Cold-insoluble globulin) (CIG) [Cleaved into: Anastellin; Ugl-Y1; Ugl-Y2; Ugl-Y3]	2.66278	2.56956e-14
LAMB2_HUMAN	33	LAMB2 LAMS	Laminin subunit beta-2 (Laminin B1s chain) (Laminin-11 subunit beta) (Laminin-14 subunit beta) (Laminin-15 subunit beta) (Laminin-3 subunit beta) (Laminin-4 subunit beta) (Laminin-7 subunit beta) (Laminin-9 subunit beta) (S-laminin subunit beta) (S-LAM beta)	2.62733	1.86899e-11
FBLN1_HUMAN	10	FBLN1 PP213	Fibulin-1 (FIBL-1)	2.62675	1.64737e-14
BGH3_HUMAN	19	TGFBI BIGH3	Transforming growth factor-beta-induced protein ig-h3 (Beta ig-h3) (Kerato-epithelin) (RGD-containing collagen-associated protein) (RGD-CAP)	2.59771	3.46791e-09
CO5_HUMAN	16	C5 CPAMD4	Complement C5 (C3 and PZP-like alpha-2-macroglobulin domain-containing protein 4) [Cleaved into: Complement C5 beta chain; Complement C5 alpha chain; C5a anaphylatoxin; Complement C5 alpha' chain]	2.57793	1.64737e-14
PRELP_HUMAN	13	PRELP SLRR2A	Prolargin (Proline-arginine-rich end leucine-rich repeat protein)	2.56835	1.04829e-09
SAMP_HUMAN	13	APCS PTX2	Serum amyloid P-component (SAP) (9.5S alpha-1-glycoprotein) [Cleaved into: Serum amyloid P-component(1-203)]	2.55828	9.77227e-14
VWF_HUMAN	25	VWF F8VWF	von Willebrand factor (vWF) [Cleaved into: von Willebrand antigen 2 (von Willebrand antigen II)]	2.55789	4.41046e-08
FLNA_HUMAN	123	FLNA FLN FLN1	Filamin-A (FLN-A) (Actin-binding protein 280) (ABP-280) (Alpha-filamin) (Endothelial actin-binding protein) (Filamin-1) (Non-muscle filamin)	2.54264	1.64737e-14
LAMA5_HUMAN	40	LAMA5 KIAA0533 KIAA1907	Laminin subunit alpha-5 (Laminin-10 subunit alpha) (Laminin-11 subunit alpha) (Laminin-15 subunit alpha)	2.53877	2.11006e-08
TINAL_HUMAN	4	TINAGL1 GIS5 LCN7 OLRG2 TINAGL PP6614 PSEC0088 UNQ204/PRO230	Tubulointerstitial nephritis antigen-like (Glucocorticoid-inducible protein 5) (Oxidized LDL-responsive gene 2 protein) (OLRG-2) (Tubulointerstitial nephritis antigen-related protein) (TIN Ag-related protein) (TIN-Ag-RP)	2.53557	8.43089e-05
SODE_HUMAN	4	SOD3	Extracellular superoxide dismutase [Cu-Zn] (EC-SOD) (EC 1.15.1.1)	2.51166	6.705e-12
CO6_HUMAN	4	C6	Complement component C6	2.49671	2.02703e-08
AMBP_HUMAN	3	AMBP HCP ITIL	Protein AMBP [Cleaved into: Alpha-1-microglobulin (Protein HC) (Alpha-1 microglycoprotein) (Complex-forming glycoprotein heterogeneous in charge); Inter-alpha-trypsin inhibitor light chain (ITI-LC) (Bikunin) (EDC1) (HI-30) (Uronic-acid-rich protein); Trypstatin]	2.47106	1.86321e-08
CSPG4_HUMAN	11	CSPG4 MCSP	Chondroitin sulfate proteoglycan 4 (Chondroitin sulfate proteoglycan NG2) (Melanoma chondroitin sulfate proteoglycan) (Melanoma-associated chondroitin sulfate proteoglycan)	2.46928	1.64737e-14
TENA_HUMAN	12	TNC HXB	Tenascin (TN) (Cytotactin) (GMEM) (GP 150-225) (Glioma-associated-extracellular matrix antigen) (Hexabrachion) (JI) (Myotendinous antigen) (Neuronectin) (Tenascin-C) (TN-C)	2.46876	1.8e-14
CO8G_HUMAN	5	C8G	Complement component C8 gamma chain	2.44837	2.05516e-09
LAMC1_HUMAN	18	LAMC1 LAMB2	Laminin subunit gamma-1 (Laminin B2 chain) (Laminin-1 subunit gamma) (Laminin-10 subunit gamma) (Laminin-11 subunit gamma) (Laminin-2 subunit gamma) (Laminin-3 subunit gamma) (Laminin-4 subunit gamma) (Laminin-6 subunit gamma) (Laminin-7 subunit gamma) (Laminin-8 subunit gamma) (Laminin-9 subunit gamma) (S-laminin subunit gamma) (S-LAM gamma)	2.4419	1.17119e-08
MYH10_HUMAN	92	MYH10	Myosin-10 (Cellular myosin heavy chain, type B) (Myosin heavy chain 10) (Myosin heavy chain, non-muscle IIb) (Non-muscle myosin heavy chain B) (NMMHC-B) (Non-muscle myosin heavy chain IIb) (NMMHC II-b) (NMMHC-IIB)	2.4403	1.64737e-14
COCA1_HUMAN	25	COL12A1 COL12A1L	Collagen alpha-1(XII) chain	2.41231	1.64737e-14
TPM1_HUMAN	31	TPM1 C15orf13 TMSA	Tropomyosin alpha-1 chain (Alpha-tropomyosin) (Tropomyosin-1)	2.40834	1.77981e-13
CO5A1_HUMAN	7	COL5A1	Collagen alpha-1(V) chain	2.40721	1.53338e-12
LUM_HUMAN	14	LUM LDC SLRR2D	Lumican (Keratan sulfate proteoglycan lumican) (KSPG lumican)	2.40511	6.96697e-09
SGCD_HUMAN	5	SGCD	Delta-sarcoglycan (Delta-SG) (35 kDa dystrophin-associated glycoprotein) (35DAG)	2.40305	1.12054e-09
SYNEM_HUMAN	7	SYNM DMN KIAA0353 SYN	Synemin (Desmuslin)	2.39099	1.74661e-11
ADIRF_HUMAN	4	ADIRF AFRO APM2 C10orf116	Adipogenesis regulatory factor (Adipogenesis factor rich in obesity) (Adipose most abundant gene transcript 2 protein) (Adipose-specific protein 2) (apM-2)	2.38989	5.39381e-09
HSPB1_HUMAN	19	HSPB1 HSP27 HSP28	Heat shock protein beta-1 (HspB1) (28 kDa heat shock protein) (Estrogen-regulated 24 kDa protein) (Heat shock 27 kDa protein) (HSP 27) (Stress-responsive protein 27) (SRP27)	2.36496	1.77038e-13
CMA1_HUMAN	3	CMA1 CYH CYM	Chymase (EC 3.4.21.39) (Alpha-chymase) (Mast cell protease I)	2.36173	2.84473e-06
ACTN1_HUMAN	28	ACTN1	Alpha-actinin-1 (Alpha-actinin cytoskeletal isoform) (F-actin cross-linking protein) (Non-muscle alpha-actinin-1)	2.33859	0.00285775
MYL6_HUMAN	8	MYL6	Myosin light polypeptide 6 (17 kDa myosin light chain) (LC17) (Myosin light chain 3) (MLC-3) (Myosin light chain alkali 3) (Myosin light chain A3) (Smooth muscle and nonmuscle myosin light chain alkali 6)	2.31724	0.000657925
B7Z9B7_HUMAN	5			2.30895	1.7281e-07
VTNC_HUMAN	10	VTN	Vitronectin (VN) (S-protein) (Serum-spreading factor) (V75) [Cleaved into: Vitronectin V65 subunit; Vitronectin V10 subunit; Somatomedin-B]	2.26701	4.76646e-12
MYLK_HUMAN	20	MYLK MLCK MLCK1 MYLK1	Myosin light chain kinase, smooth muscle (MLCK) (smMLCK) (EC 2.7.11.18) (Kinase-related protein) (KRP) (Telokin) [Cleaved into: Myosin light chain kinase, smooth muscle, deglutamylated form]	2.25038	1.32327e-13
NIBAN_HUMAN	8	FAM129A C1orf24 NIBAN GIG39	Protein Niban (Cell growth-inhibiting gene 39 protein) (Protein FAM129A)	2.17933	8.28484e-14
TIMP3_HUMAN	3	TIMP3	Metalloproteinase inhibitor 3 (Protein MIG-5) (Tissue inhibitor of metalloproteinases 3) (TIMP-3)	2.17883	2.57658e-05
A0A024R5Z9_HUMAN	3			2.16054	5.64343e-05
DEST_HUMAN	4	DSTN ACTDP DSN	Destrin (Actin-depolymerizing factor) (ADF)	2.14635	9.51556e-07
FABPH_HUMAN	5	FABP3 FABP11 MDGI	Fatty acid-binding protein, heart (Fatty acid-binding protein 3) (Heart-type fatty acid-binding protein) (H-FABP) (Mammary-derived growth inhibitor) (MDGI) (Muscle fatty acid-binding protein) (M-FABP)	2.08809	3.71333e-08
CO7_HUMAN	7	C7	Complement component C7	2.08782	2.47039e-06
ML12A_HUMAN	9	MYL12A MLCB MRLC3 RLC	Myosin regulatory light chain 12A (Epididymis secretory protein Li 24) (HEL-S-24) (MLC-2B) (Myosin RLC) (Myosin regulatory light chain 2, nonsarcomeric) (Myosin regulatory light chain MRLC3)	2.0614	0.00911647
KGP1_HUMAN	7	PRKG1 PRKG1B PRKGR1A PRKGR1B	cGMP-dependent protein kinase 1 (cGK 1) (cGK1) (EC 2.7.11.12) (cGMP-dependent protein kinase I) (cGKI)	2.05098	2.74054e-09
MATN2_HUMAN	3	MATN2 UNQ193/PRO219	Matrilin-2	2.03165	2.18049e-05
CBPA3_HUMAN	7	CPA3	Mast cell carboxypeptidase A (MC-CPA) (EC 3.4.17.1) (Carboxypeptidase A3)	2.01694	1.23325e-09
VWA1_HUMAN	6	VWA1	von Willebrand factor A domain-containing protein 1	1.97684	4.86773e-06
TGFI1_HUMAN	4	TGFB1I1 ARA55	Transforming growth factor beta-1-induced transcript 1 protein (Androgen receptor coactivator 55 kDa protein) (Androgen receptor-associated protein of 55 kDa) (Hydrogen peroxide-inducible clone 5 protein) (Hic-5)	1.89931	1.61178e-05
CO7A1_HUMAN	4	COL7A1	Collagen alpha-1(VII) chain (Long-chain collagen) (LC collagen)	1.88199	0.000132209
ACTC_HUMAN	38	ACTC1 ACTC	Actin, alpha cardiac muscle 1 (Alpha-cardiac actin) [Cleaved into: Actin, alpha cardiac muscle 1, intermediate form]	1.86259	1.64737e-14
PGS2_HUMAN	11	DCN SLRR1B	Decorin (Bone proteoglycan II) (PG-S2) (PG40)	1.85282	2.58457e-07
PFKAP_HUMAN	8	PFKP PFKF	ATP-dependent 6-phosphofructokinase, platelet type (ATP-PFK) (PFK-P) (EC 2.7.1.11) (6-phosphofructokinase type C) (Phosphofructo-1-kinase isozyme C) (PFK-C) (Phosphohexokinase)	1.84787	5.52232e-08
TENS1_HUMAN	30	TNS1 TNS	Tensin-1	1.82896	2.70313e-12
TENX_HUMAN	23	TNXB HXBL TNX TNXB1 TNXB2 XB	Tenascin-X (TN-X) (Hexabrachion-like protein)	1.75517	1.64737e-14
AEBP1_HUMAN	6	AEBP1 ACLP	Adipocyte enhancer-binding protein 1 (AE-binding protein 1) (Aortic carboxypeptidase-like protein)	1.75079	9.75088e-07
NID1_HUMAN	16	NID1 NID	Nidogen-1 (NID-1) (Entactin)	1.73826	1.16328e-12
VINC_HUMAN	67	VCL	Vinculin (Metavinculin) (MV)	1.7204	5.73874e-10
APOE_HUMAN	6	APOE	Apolipoprotein E (Apo-E)	1.70906	2.18702e-06
TGM2_HUMAN	24	TGM2	Protein-glutamine gamma-glutamyltransferase 2 (EC 2.3.2.13) (Tissue transglutaminase) (Transglutaminase C) (TG(C)) (TGC) (TGase C) (Transglutaminase H) (TGase H) (Transglutaminase-2) (TGase-2)	1.70018	1.84725e-08
FBLN5_HUMAN	6	FBLN5 DANCE UNQ184/PRO210	Fibulin-5 (FIBL-5) (Developmental arteries and neural crest EGF-like protein) (Dance) (Urine p50 protein) (UP50)	1.69645	3.90624e-06
ARC1A_HUMAN	3	ARPC1A SOP2L	Actin-related protein 2/3 complex subunit 1A (SOP2-like protein)	1.69093	5.52808e-06
ITB5_HUMAN	3	ITGB5	Integrin beta-5	1.65154	0.00100887
PYGB_HUMAN	17	PYGB	Glycogen phosphorylase, brain form (EC 2.4.1.1)	1.59147	7.58791e-11
VINEX_HUMAN	5	SORBS3 SCAM1	Vinexin (SH3-containing adapter molecule 1) (SCAM-1) (Sorbin and SH3 domain-containing protein 3)	1.5843	9.40527e-06
ITPR1_HUMAN	4	ITPR1 INSP3R1	Inositol 1,4,5-trisphosphate receptor type 1 (IP3 receptor isoform 1) (IP3R 1) (InsP3R1) (Type 1 inositol 1,4,5-trisphosphate receptor) (Type 1 InsP3 receptor)	1.55773	0.000441677
CO6A1_HUMAN	31	COL6A1	Collagen alpha-1(VI) chain	1.54819	7.28178e-10
CO6A2_HUMAN	25	COL6A2	Collagen alpha-2(VI) chain	1.53256	0.00750852
SPON1_HUMAN	4	SPON1 KIAA0762 VSGP	Spondin-1 (F-spondin) (Vascular smooth muscle cell growth-promoting factor)	1.49998	0.00153927
AKA12_HUMAN	7	AKAP12 AKAP250	A-kinase anchor protein 12 (AKAP-12) (A-kinase anchor protein 250 kDa) (AKAP 250) (Gravin) (Myasthenia gravis autoantigen)	1.49321	5.62285e-07
HMMR_HUMAN	3	HMMR IHABP RHAMM	Hyaluronan mediated motility receptor (Intracellular hyaluronic acid-binding protein) (Receptor for hyaluronan-mediated motility) (CD antigen CD168)	1.46773	0.000170096
APOA4_HUMAN	18	APOA4	Apolipoprotein A-IV (Apo-AIV) (ApoA-IV) (Apolipoprotein A4)	1.46619	4.41963e-05
KVD13_HUMAN	3	IGKV1D-13	Immunoglobulin kappa variable 1D-13	1.46489	0.00182404
CO6A3_HUMAN	111	COL6A3	Collagen alpha-3(VI) chain	1.45352	1.12474e-05
LAMA4_HUMAN	5	LAMA4	Laminin subunit alpha-4 (Laminin-14 subunit alpha) (Laminin-8 subunit alpha) (Laminin-9 subunit alpha)	1.43622	4.66337e-05
ACTN2_HUMAN	5	ACTN2	Alpha-actinin-2 (Alpha-actinin skeletal muscle isoform 2) (F-actin cross-linking protein)	1.40835	0.00346066
ITAV_HUMAN	7	ITGAV MSK8 VNRA VTNR	Integrin alpha-V (Vitronectin receptor) (Vitronectin receptor subunit alpha) (CD antigen CD51) [Cleaved into: Integrin alpha-V heavy chain; Integrin alpha-V light chain]	1.39269	2.54166e-07
SERA_HUMAN	3	PHGDH PGDH3	D-3-phosphoglycerate dehydrogenase (3-PGDH) (EC 1.1.1.95) (2-oxoglutarate reductase) (EC 1.1.1.399) (Malate dehydrogenase) (EC 1.1.1.37)	1.37337	6.26328e-06
EMIL1_HUMAN	25	EMILIN1 EMI	EMILIN-1 (Elastin microfibril interface-located protein 1) (Elastin microfibril interfacer 1)	1.36554	2.45258e-09
SNTB2_HUMAN	6	SNTB2 D16S2531E SNT2B2 SNTL	Beta-2-syntrophin (59 kDa dystrophin-associated protein A1 basic component 2) (Syntrophin-3) (SNT3) (Syntrophin-like) (SNTL)	1.33677	0.000206032
PARVA_HUMAN	8	PARVA MXRA2	Alpha-parvin (Actopaxin) (CH-ILKBP) (Calponin-like integrin-linked kinase-binding protein) (Matrix-remodeling-associated protein 2)	1.33595	1.94016e-05
AOC3_HUMAN	17	AOC3 VAP1	Membrane primary amine oxidase (EC 1.4.3.21) (Copper amine oxidase) (HPAO) (Semicarbazide-sensitive amine oxidase) (SSAO) (Vascular adhesion protein 1) (VAP-1)	1.31979	0.00095166
BCAM_HUMAN	7	BCAM LU MSK19	Basal cell adhesion molecule (Auberger B antigen) (B-CAM cell surface glycoprotein) (F8/G253 antigen) (Lutheran antigen) (Lutheran blood group glycoprotein) (CD antigen CD239)	1.3103	6.96695e-05
ACTN4_HUMAN	51	ACTN4	Alpha-actinin-4 (Non-muscle alpha-actinin 4)	1.30235	0.0686211
TES_HUMAN	4	TES	Testin (TESS)	1.2993	0.000560509
CRIP2_HUMAN	4	CRIP2 CRP2	Cysteine-rich protein 2 (CRP-2) (Protein ESP1)	1.29354	1.57225e-05
RHG01_HUMAN	12	ARHGAP1 CDC42GAP RHOGAP1	Rho GTPase-activating protein 1 (CDC42 GTPase-activating protein) (GTPase-activating protein rhoGAP) (Rho-related small GTPase protein activator) (Rho-type GTPase-activating protein 1) (p50-RhoGAP)	1.26227	0.000174021
RSU1_HUMAN	5	RSU1 RSP1	Ras suppressor protein 1 (RSP-1) (Rsu-1)	1.24012	0.00257427
NID2_HUMAN	7	NID2	Nidogen-2 (NID-2) (Osteonidogen)	1.20012	1.2997e-05
1433F_HUMAN	3	YWHAH YWHA1	14-3-3 protein eta (Protein AS1)	1.19472	0.01277
ITA1_HUMAN	9	ITGA1	Integrin alpha-1 (CD49 antigen-like family member A) (Laminin and collagen receptor) (VLA-1) (CD antigen CD49a)	1.19305	8.92901e-08
SH3L1_HUMAN	4	SH3BGRL	SH3 domain-binding glutamic acid-rich-like protein	1.17239	0.000411384
ENTP1_HUMAN	4	ENTPD1 CD39	Ectonucleoside triphosphate diphosphohydrolase 1 (NTPDase 1) (EC 3.6.1.5) (Ecto-ATP diphosphohydrolase 1) (Ecto-ATPDase 1) (Ecto-ATPase 1) (Ecto-apyrase) (Lymphoid cell activation antigen) (CD antigen CD39)	1.15492	0.00146861
ITB1_HUMAN	14	ITGB1 FNRB MDF2 MSK12	Integrin beta-1 (Fibronectin receptor subunit beta) (Glycoprotein IIa) (GPIIA) (VLA-4 subunit beta) (CD antigen CD29)	1.13997	6.72575e-06
DPYL3_HUMAN	12	DPYSL3 CRMP4 DRP3 ULIP ULIP1	Dihydropyrimidinase-related protein 3 (DRP-3) (Collapsin response mediator protein 4) (CRMP-4) (Unc-33-like phosphoprotein 1) (ULIP-1)	1.13489	6.39531e-07
MAP1A_HUMAN	3	MAP1A MAP1L	Microtubule-associated protein 1A (MAP-1A) (Proliferation-related protein p80) [Cleaved into: MAP1A heavy chain; MAP1 light chain LC2]	1.11948	0.00672744
FBN1_HUMAN	4	FBN1 FBN	Fibrillin-1 [Cleaved into: Asprosin]	1.11043	0.0351954
FERM2_HUMAN	9	FERMT2 KIND2 MIG2 PLEKHC1	Fermitin family homolog 2 (Kindlin-2) (Mitogen-inducible gene 2 protein) (MIG-2) (Pleckstrin homology domain-containing family C member 1) (PH domain-containing family C member 1)	1.11032	2.38733e-05
RRAS_HUMAN	7	RRAS	Ras-related protein R-Ras (p23)	1.10637	3.12814e-05
HRG_HUMAN	3	HRG	Histidine-rich glycoprotein (Histidine-proline-rich glycoprotein) (HPRG)	1.09704	0.00998819
CFAH_HUMAN	4	CFH HF HF1 HF2	Complement factor H (H factor 1)	1.09178	0.00620427
ILK_HUMAN	10	ILK ILK1 ILK2	Integrin-linked protein kinase (EC 2.7.11.1) (59 kDa serine/threonine-protein kinase) (ILK-1) (ILK-2) (p59ILK)	1.08704	4.17429e-06
FYCO1_HUMAN	4	FYCO1 ZFYVE7	FYVE and coiled-coil domain-containing protein 1 (Zinc finger FYVE domain-containing protein 7)	1.06992	0.0358509
PEDF_HUMAN	7	SERPINF1 PEDF PIG35	Pigment epithelium-derived factor (PEDF) (Cell proliferation-inducing gene 35 protein) (EPC-1) (Serpin F1)	1.06319	0.000278869
DREB_HUMAN	3	DBN1 D0S117E	Drebrin (Developmentally-regulated brain protein)	1.0586	0.00188244
LEG1_HUMAN	6	LGALS1	Galectin-1 (Gal-1) (14 kDa laminin-binding protein) (HLBP14) (14 kDa lectin) (Beta-galactoside-binding lectin L-14-I) (Galaptin) (HBL) (HPL) (Lactose-binding lectin 1) (Lectin galactoside-binding soluble 1) (Putative MAPK-activating protein PM12) (S-Lac lectin 1)	1.05476	0.0013996
TLN2_HUMAN	10	TLN2 KIAA0320	Talin-2	1.04505	0.0226912
PDCD6_HUMAN	5	PDCD6 ALG2	Programmed cell death protein 6 (Apoptosis-linked gene 2 protein homolog) (ALG-2)	1.04296	0.00159056
GLYG_HUMAN	4	GYG1 GYG	Glycogenin-1 (GN-1) (GN1) (EC 2.4.1.186)	1.03866	0.000343083
CSRP1_HUMAN	4	CSRP1 CSRP CYRP	Cysteine and glycine-rich protein 1 (Cysteine-rich protein 1) (CRP) (CRP1) (Epididymis luminal protein 141) (HEL-141)	1.03195	0.00213386
C1QB_HUMAN	6	C1QB	Complement C1q subcomponent subunit B	0.982124	0.00233986
TLN1_HUMAN	60	TLN1 KIAA1027 TLN	Talin-1	0.960561	0.0142308
QSOX1_HUMAN	3	QSOX1 QSCN6 UNQ2520/PRO6013	Sulfhydryl oxidase 1 (hQSOX) (EC 1.8.3.2) (Quiescin Q6)	0.959458	0.0245974
C1QC_HUMAN	4	C1QC C1QG	Complement C1q subcomponent subunit C	0.949768	0.00341208
KCRB_HUMAN	11	CKB CKBB	Creatine kinase B-type (EC 2.7.3.2) (Brain creatine kinase) (B-CK) (Creatine kinase B chain) (Creatine phosphokinase B-type) (CPK-B)	0.923095	0.000929759
TPM4_HUMAN	19	TPM4	Tropomyosin alpha-4 chain (TM30p1) (Tropomyosin-4)	0.888737	0.000589135
DNM1L_HUMAN	3	DNM1L DLP1 DRP1	Dynamin-1-like protein (EC 3.6.5.5) (Dnm1p/Vps1p-like protein) (DVLP) (Dynamin family member proline-rich carboxyl-terminal domain less) (Dymple) (Dynamin-like protein) (Dynamin-like protein 4) (Dynamin-like protein IV) (HdynIV) (Dynamin-related protein 1)	0.848195	0.0325256
TDR15_HUMAN	4	TDRD15	Tudor domain-containing protein 15	0.847948	0.0543799
G3P_HUMAN	28	GAPDH GAPD CDABP0047 OK/SW-cl.12	Glyceraldehyde-3-phosphate dehydrogenase (GAPDH) (EC 1.2.1.12) (Peptidyl-cysteine S-nitrosylase GAPDH) (EC 2.6.99.-)	0.844655	0.0504715
KANK2_HUMAN	7	KANK2 ANKRD25 KIAA1518 MXRA3 SIP	KN motif and ankyrin repeat domain-containing protein 2 (Ankyrin repeat domain-containing protein 25) (Matrix-remodeling-associated protein 3) (SRC-1-interacting protein) (SIP) (SRC-interacting protein) (SRC1-interacting protein)	0.798422	0.00992745
MYPT1_HUMAN	6	PPP1R12A MBS MYPT1	Protein phosphatase 1 regulatory subunit 12A (Myosin phosphatase-targeting subunit 1) (Myosin phosphatase target subunit 1) (Protein phosphatase myosin-binding subunit)	0.793797	0.00124856
POSTN_HUMAN	14	POSTN OSF2	Periostin (PN) (Osteoblast-specific factor 2) (OSF-2)	0.790199	0.00997415
SUN2_HUMAN	3	SUN2 FRIGG KIAA0668 RAB5IP UNC84B	SUN domain-containing protein 2 (Protein unc-84 homolog B) (Rab5-interacting protein) (Rab5IP) (Sad1/unc-84 protein-like 2)	0.776576	0.0481335
KNTC1_HUMAN	4	KNTC1 KIAA0166	Kinetochore-associated protein 1 (Rough deal homolog) (HsROD) (Rod) (hRod)	0.776058	0.111331
GELS_HUMAN	24	GSN	Gelsolin (AGEL) (Actin-depolymerizing factor) (ADF) (Brevin)	0.769331	0.00616562
LMCD1_HUMAN	8	LMCD1	LIM and cysteine-rich domains protein 1 (Dyxin)	0.765717	0.000223388
MYO1D_HUMAN	8	MYO1D KIAA0727	Unconventional myosin-Id	0.765104	0.02146
A0A059RIK5_HUMAN	4			0.754293	0.10202
GPX3_HUMAN	4	GPX3 GPXP	Glutathione peroxidase 3 (GPx-3) (GSHPx-3) (EC 1.11.1.9) (Extracellular glutathione peroxidase) (Plasma glutathione peroxidase) (GPx-P) (GSHPx-P)	0.753783	0.00710428
PGH1_HUMAN	3	PTGS1 COX1	Prostaglandin G/H synthase 1 (EC 1.14.99.1) (Cyclooxygenase-1) (COX-1) (Prostaglandin H2 synthase 1) (PGH synthase 1) (PGHS-1) (PHS 1) (Prostaglandin-endoperoxide synthase 1)	0.712715	0.139863
CO8B_HUMAN	4	C8B	Complement component C8 beta chain (Complement component 8 subunit beta)	0.685295	0.0874223
WDR1_HUMAN	17	WDR1	WD repeat-containing protein 1 (Actin-interacting protein 1) (AIP1) (NORI-1)	0.653952	0.0267293
CMC1_HUMAN	3	SLC25A12 ARALAR1	Calcium-binding mitochondrial carrier protein Aralar1 (Mitochondrial aspartate glutamate carrier 1) (Solute carrier family 25 member 12)	0.651662	0.0200103
SEPT8_HUMAN	3	SEPT8 KIAA0202	Septin-8	0.642609	0.0527105
CNN3_HUMAN	6	CNN3	Calponin-3 (Calponin, acidic isoform)	0.62326	0.0340266
GDE_HUMAN	5	AGL GDE	Glycogen debranching enzyme (Glycogen debrancher) [Includes: 4-alpha-glucanotransferase (EC 2.4.1.25) (Oligo-1,4-1,4-glucantransferase); Amylo-alpha-1,6-glucosidase (Amylo-1,6-glucosidase) (EC 3.2.1.33) (Dextrin 6-alpha-D-glucosidase)]	0.607389	0.0303558
ANXA6_HUMAN	37	ANXA6 ANX6	Annexin A6 (67 kDa calelectrin) (Annexin VI) (Annexin-6) (Calphobindin-II) (CPB-II) (Chromobindin-20) (Lipocortin VI) (Protein III) (p68) (p70)	0.605853	0.447226
CLIC4_HUMAN	6	CLIC4	Chloride intracellular channel protein 4 (Intracellular chloride ion channel protein p64H1)	0.603166	0.00538759
DP13A_HUMAN	3	APPL1 APPL DIP13A KIAA1428	DCC-interacting protein 13-alpha (Dip13-alpha) (Adapter protein containing PH domain, PTB domain and leucine zipper motif 1)	0.600821	0.102305
PCLO_HUMAN	5	PCLO ACZ KIAA0559	Protein piccolo (Aczonin)	0.562483	0.150361
A0A024RB87_HUMAN	5			0.556453	0.235879
ITIH4_HUMAN	4	ITIH4 IHRP ITIHL1 PK120 PRO1851	Inter-alpha-trypsin inhibitor heavy chain H4 (ITI heavy chain H4) (ITI-HC4) (Inter-alpha-inhibitor heavy chain 4) (Inter-alpha-trypsin inhibitor family heavy chain-related protein) (IHRP) (Plasma kallikrein sensitive glycoprotein 120) (Gp120) (PK-120) [Cleaved into: 70 kDa inter-alpha-trypsin inhibitor heavy chain H4; 35 kDa inter-alpha-trypsin inhibitor heavy chain H4]	0.550703	0.151486
NPM_HUMAN	4	NPM1 NPM	Nucleophosmin (NPM) (Nucleolar phosphoprotein B23) (Nucleolar protein NO38) (Numatrin)	0.533965	0.11078
TMM43_HUMAN	14	TMEM43 UNQ2564/PRO6244	Transmembrane protein 43 (Protein LUMA)	0.502332	0.0174169
PFKAM_HUMAN	4	PFKM PFKX	ATP-dependent 6-phosphofructokinase, muscle type (ATP-PFK) (PFK-M) (EC 2.7.1.11) (6-phosphofructokinase type A) (Phosphofructo-1-kinase isozyme A) (PFK-A) (Phosphohexokinase)	0.484185	0.0532394
MYH9_HUMAN	103	MYH9	Myosin-9 (Cellular myosin heavy chain, type A) (Myosin heavy chain 9) (Myosin heavy chain, non-muscle IIa) (Non-muscle myosin heavy chain A) (NMMHC-A) (Non-muscle myosin heavy chain IIa) (NMMHC II-a) (NMMHC-IIA)	0.481851	0.32567
LTBP2_HUMAN	4	LTBP2 C14orf141 LTBP3	Latent-transforming growth factor beta-binding protein 2 (LTBP-2)	0.477463	0.166579
VIME_HUMAN	72	VIM	Vimentin	0.444327	0.00510969
1433T_HUMAN	4	YWHAQ	14-3-3 protein theta (14-3-3 protein T-cell) (14-3-3 protein tau) (Protein HS1)	0.433317	0.382148
TTHY_HUMAN	6	TTR PALB	Transthyretin (ATTR) (Prealbumin) (TBPA)	0.430659	0.18208
CFAB_HUMAN	3	CFB BF BFD	Complement factor B (EC 3.4.21.47) (C3/C5 convertase) (Glycine-rich beta glycoprotein) (GBG) (PBF2) (Properdin factor B) [Cleaved into: Complement factor B Ba fragment; Complement factor B Bb fragment]	0.425996	0.126707
PLIN3_HUMAN	4	PLIN3 M6PRBP1 TIP47	Perilipin-3 (47 kDa mannose 6-phosphate receptor-binding protein) (47 kDa MPR-binding protein) (Cargo selection protein TIP47) (Mannose-6-phosphate receptor-binding protein 1) (Placental protein 17) (PP17)	0.425125	0.161183
EMAL2_HUMAN	5	EML2 EMAP2 EMAPL2	Echinoderm microtubule-associated protein-like 2 (EMAP-2) (HuEMAP-2)	0.423452	0.145709
AT2A1_HUMAN	5	ATP2A1	Sarcoplasmic/endoplasmic reticulum calcium ATPase 1 (SERCA1) (SR Ca(2+)-ATPase 1) (EC 7.2.2.10) (Calcium pump 1) (Calcium-transporting ATPase sarcoplasmic reticulum type, fast twitch skeletal muscle isoform) (Endoplasmic reticulum class 1/2 Ca(2+) ATPase)	0.407628	0.0172795
ALDOC_HUMAN	4	ALDOC ALDC	Fructose-bisphosphate aldolase C (EC 4.1.2.13) (Brain-type aldolase)	0.401213	0.42603
PSMD6_HUMAN	4	PSMD6 KIAA0107 PFAAP4	26S proteasome non-ATPase regulatory subunit 6 (26S proteasome regulatory subunit RPN7) (26S proteasome regulatory subunit S10) (Breast cancer-associated protein SGA-113M) (Phosphonoformate immuno-associated protein 4) (Proteasome regulatory particle subunit p44S10) (p42A)	0.391312	0.260108
GNAS1_HUMAN	7	GNAS GNAS1	Guanine nucleotide-binding protein G(s) subunit alpha isoforms XLas (Adenylate cyclase-stimulating G alpha protein) (Extra large alphas protein) (XLalphas)	0.380184	0.18031
ANK1_HUMAN	4	ANK1 ANK	Ankyrin-1 (ANK-1) (Ankyrin-R) (Erythrocyte ankyrin)	0.378167	0.338199
GSTM3_HUMAN	4	GSTM3 GST5	Glutathione S-transferase Mu 3 (EC 2.5.1.18) (GST class-mu 3) (GSTM3-3) (hGSTM3-3)	0.369545	0.305285
ARHG2_HUMAN	3	ARHGEF2 KIAA0651 LFP40	Rho guanine nucleotide exchange factor 2 (Guanine nucleotide exchange factor H1) (GEF-H1) (Microtubule-regulated Rho-GEF) (Proliferating cell nucleolar antigen p40)	0.365744	0.401977
HS71A_HUMAN	26	HSPA1A HSP72 HSPA1 HSX70	Heat shock 70 kDa protein 1A (Heat shock 70 kDa protein 1) (HSP70-1) (HSP70.1)	0.352848	0.680513
ATLA3_HUMAN	7	ATL3	Atlastin-3 (EC 3.6.5.-)	0.347506	0.181064
RBPMS_HUMAN	4	RBPMS HERMES	RNA-binding protein with multiple splicing (RBP-MS) (Heart and RRM expressed sequence) (Hermes)	0.340936	0.388711
AOFB_HUMAN	8	MAOB	Amine oxidase [flavin-containing] B (EC 1.4.3.4) (Monoamine oxidase type B) (MAO-B)	0.33877	0.185364
PSB5_HUMAN	5	PSMB5 LMPX MB1 X	Proteasome subunit beta type-5 (EC 3.4.25.1) (Macropain epsilon chain) (Multicatalytic endopeptidase complex epsilon chain) (Proteasome chain 6) (Proteasome epsilon chain) (Proteasome subunit MB1) (Proteasome subunit X)	0.309552	0.328424
ANT3_HUMAN	6	SERPINC1 AT3 PRO0309	Antithrombin-III (ATIII) (Serpin C1)	0.308992	0.372829
CD9_HUMAN	3	CD9 MIC3 TSPAN29 GIG2	CD9 antigen (5H9 antigen) (Cell growth-inhibiting gene 2 protein) (Leukocyte antigen MIC3) (Motility-related protein) (MRP-1) (Tetraspanin-29) (Tspan-29) (p24) (CD antigen CD9)	0.287759	0.436883
PP1B_HUMAN	4	PPP1CB	Serine/threonine-protein phosphatase PP1-beta catalytic subunit (PP-1B) (PPP1CD) (EC 3.1.3.16) (EC 3.1.3.53)	0.283759	0.456981
AT2A2_HUMAN	8	ATP2A2 ATP2B	Sarcoplasmic/endoplasmic reticulum calcium ATPase 2 (SERCA2) (SR Ca(2+)-ATPase 2) (EC 7.2.2.10) (Calcium pump 2) (Calcium-transporting ATPase sarcoplasmic reticulum type, slow twitch skeletal muscle isoform) (Endoplasmic reticulum class 1/2 Ca(2+) ATPase)	0.283459	0.17024
EHD2_HUMAN	30	EHD2 PAST2	EH domain-containing protein 2 (PAST homolog 2)	0.283245	0.489068
RRAS2_HUMAN	5	RRAS2 TC21	Ras-related protein R-Ras2 (Ras-like protein TC21) (Teratocarcinoma oncogene)	0.282009	0.41149
DERM_HUMAN	3	DPT	Dermatopontin (Tyrosine-rich acidic matrix protein) (TRAMP)	0.273603	0.599868
GPD1L_HUMAN	5	GPD1L KIAA0089	Glycerol-3-phosphate dehydrogenase 1-like protein (GPD1-L) (EC 1.1.1.8)	0.273126	0.22738
SYSC_HUMAN	3	SARS SERS	Serine--tRNA ligase, cytoplasmic (EC 6.1.1.11) (Seryl-tRNA synthetase) (SerRS) (Seryl-tRNA(Ser/Sec) synthetase)	0.271193	0.579755
DC1L1_HUMAN	3	DYNC1LI1 DNCLI1	Cytoplasmic dynein 1 light intermediate chain 1 (LIC1) (Dynein light chain A) (DLC-A) (Dynein light intermediate chain 1, cytosolic)	0.269625	0.579204
ALDOA_HUMAN	14	ALDOA ALDA	Fructose-bisphosphate aldolase A (EC 4.1.2.13) (Lung cancer antigen NY-LU-1) (Muscle-type aldolase)	0.269505	0.547325
TPM3_HUMAN	10	TPM3	Tropomyosin alpha-3 chain (Gamma-tropomyosin) (Tropomyosin-3) (Tropomyosin-5) (hTM5)	0.258748	0.536534
BUB3_HUMAN	5	BUB3	Mitotic checkpoint protein BUB3	0.252686	0.479622
ADHX_HUMAN	7	ADH5 ADHX FDH	Alcohol dehydrogenase class-3 (EC 1.1.1.1) (Alcohol dehydrogenase 5) (Alcohol dehydrogenase class chi chain) (Alcohol dehydrogenase class-III) (Glutathione-dependent formaldehyde dehydrogenase) (FALDH) (FDH) (GSH-FDH) (EC 1.1.1.-) (S-(hydroxymethyl)glutathione dehydrogenase) (EC 1.1.1.284)	0.246337	0.436153
TB182_HUMAN	4	TNKS1BP1 KIAA1741 TAB182	182 kDa tankyrase-1-binding protein	0.23786	0.583929
HEMO_HUMAN	5	HPX	Hemopexin (Beta-1B-glycoprotein)	0.228765	0.524493
SVIL_HUMAN	5	SVIL	Supervillin (Archvillin) (p205/p250)	0.222373	0.489936
LASP1_HUMAN	8	LASP1 MLN50	LIM and SH3 domain protein 1 (LASP-1) (Metastatic lymph node gene 50 protein) (MLN 50)	0.218365	0.397638
SUCB1_HUMAN	5	SUCLA2	Succinate--CoA ligase [ADP-forming] subunit beta, mitochondrial (EC 6.2.1.5) (ATP-specific succinyl-CoA synthetase subunit beta) (A-SCS) (Succinyl-CoA synthetase beta-A chain) (SCS-betaA)	0.216218	0.544042
KV320_HUMAN	3	IGKV3-20	Immunoglobulin kappa variable 3-20 (Ig kappa chain V-III region B6) (Ig kappa chain V-III region GOL) (Ig kappa chain V-III region HAH) (Ig kappa chain V-III region HIC) (Ig kappa chain V-III region IARC/BL41) (Ig kappa chain V-III region NG9) (Ig kappa chain V-III region SIE) (Ig kappa chain V-III region Ti) (Ig kappa chain V-III region WOL)	0.202405	0.668418
MYADM_HUMAN	3	MYADM UNQ553/PRO1110	Myeloid-associated differentiation marker (Protein SB135)	0.195762	0.604779
UTRO_HUMAN	13	UTRN DMDL DRP1	Utrophin (Dystrophin-related protein 1) (DRP-1)	0.191778	0.249789
TPD54_HUMAN	5	TPD52L2	Tumor protein D54 (hD54) (Tumor protein D52-like 2)	0.187687	0.322888
ESYT2_HUMAN	8	ESYT2 FAM62B KIAA1228	Extended synaptotagmin-2 (E-Syt2) (Chr2Syt)	0.1873	0.409601
NDUV1_HUMAN	3	NDUFV1 UQOR1	NADH dehydrogenase [ubiquinone] flavoprotein 1, mitochondrial (EC 1.6.99.3) (EC 7.1.1.2) (Complex I-51kD) (CI-51kD) (NADH dehydrogenase flavoprotein 1) (NADH-ubiquinone oxidoreductase 51 kDa subunit)	0.182381	0.646035
A1BG_HUMAN	5	A1BG	Alpha-1B-glycoprotein (Alpha-1-B glycoprotein)	0.177308	0.582718
PGM1_HUMAN	9	PGM1	Phosphoglucomutase-1 (PGM 1) (EC 5.4.2.2) (Glucose phosphomutase 1)	0.174739	0.544717
F13A_HUMAN	6	F13A1 F13A	Coagulation factor XIII A chain (Coagulation factor XIIIa) (EC 2.3.2.13) (Protein-glutamine gamma-glutamyltransferase A chain) (Transglutaminase A chain)	0.16933	0.561539
TCPW_HUMAN	3	CCT6B	T-complex protein 1 subunit zeta-2 (TCP-1-zeta-2) (CCT-zeta-2) (CCT-zeta-like) (TCP-1-zeta-like) (Testis-specific Tcp20) (Testis-specific protein TSA303)	0.166341	0.451414
SBDS_HUMAN	3	SBDS CGI-97	Ribosome maturation protein SBDS (Shwachman-Bodian-Diamond syndrome protein)	0.156333	0.704012
TITIN_HUMAN	21	TTN	Titin (EC 2.7.11.1) (Connectin) (Rhabdomyosarcoma antigen MU-RMS-40.14)	0.156232	0.563541
A1AT_HUMAN	19	SERPINA1 AAT PI PRO0684 PRO2209	Alpha-1-antitrypsin (Alpha-1 protease inhibitor) (Alpha-1-antiproteinase) (Serpin A1) [Cleaved into: Short peptide from AAT (SPAAT)]	0.149783	0.771673
SPTN4_HUMAN	3	SPTBN4 KIAA1642 SPTBN3	Spectrin beta chain, non-erythrocytic 4 (Beta-IV spectrin) (Spectrin, non-erythroid beta chain 3)	0.148639	0.768757
IST1_HUMAN	4	IST1 KIAA0174	IST1 homolog (hIST1) (Putative MAPK-activating protein PM28)	0.142129	0.669927
ENDD1_HUMAN	4	ENDOD1 KIAA0830	Endonuclease domain-containing 1 protein (EC 3.1.30.-)	0.141653	0.692145
CERU_HUMAN	5	CP	Ceruloplasmin (EC 1.16.3.1) (Ferroxidase)	0.141585	0.708047
CAVN1_HUMAN	17	CAVIN1 PTRF FKSG13	Caveolae-associated protein 1 (Cavin-1) (Polymerase I and transcript release factor)	0.140559	0.640161
ENAH_HUMAN	3	ENAH MENA	Protein enabled homolog	0.139668	0.711403
PARK7_HUMAN	7	PARK7	Protein/nucleic acid deglycase DJ-1 (EC 3.1.2.-) (EC 3.5.1.-) (EC 3.5.1.124) (Maillard deglycase) (Oncogene DJ1) (Parkinson disease protein 7) (Parkinsonism-associated deglycase) (Protein DJ-1) (DJ-1)	0.138213	0.571894
LG3BP_HUMAN	7	LGALS3BP M2BP	Galectin-3-binding protein (Basement membrane autoantigen p105) (Lectin galactoside-binding soluble 3-binding protein) (Mac-2-binding protein) (MAC2BP) (Mac-2 BP) (Tumor-associated antigen 90K)	0.13154	0.779091
2ABA_HUMAN	3	PPP2R2A	Serine/threonine-protein phosphatase 2A 55 kDa regulatory subunit B alpha isoform (PP2A subunit B isoform B55-alpha) (PP2A subunit B isoform PR55-alpha) (PP2A subunit B isoform R2-alpha) (PP2A subunit B isoform alpha)	0.127463	0.762456
KVD20_HUMAN	5	IGKV3D-20	Immunoglobulin kappa variable 3D-20	0.125884	0.859363
ITIH1_HUMAN	4	ITIH1 IGHEP1	Inter-alpha-trypsin inhibitor heavy chain H1 (ITI heavy chain H1) (ITI-HC1) (Inter-alpha-inhibitor heavy chain 1) (Inter-alpha-trypsin inhibitor complex component III) (Serum-derived hyaluronan-associated protein) (SHAP)	0.114777	0.716435
S10A7_HUMAN	3	S100A7 PSOR1 S100A7C	Protein S100-A7 (Psoriasin) (S100 calcium-binding protein A7)	0.112625	0.756159
USP9X_HUMAN	3	USP9X DFFRX FAM USP9	Probable ubiquitin carboxyl-terminal hydrolase FAF-X (EC 3.4.19.12) (Deubiquitinating enzyme FAF-X) (Fat facets in mammals) (hFAM) (Fat facets protein-related, X-linked) (Ubiquitin thioesterase FAF-X) (Ubiquitin-specific protease 9, X chromosome) (Ubiquitin-specific-processing protease FAF-X)	0.111466	0.775494
IF4G2_HUMAN	3	EIF4G2 DAP5 OK/SW-cl.75	Eukaryotic translation initiation factor 4 gamma 2 (eIF-4-gamma 2) (eIF-4G 2) (eIF4G 2) (Death-associated protein 5) (DAP-5) (p97)	0.107603	0.782757
LRP1_HUMAN	12	LRP1 A2MR APR	Prolow-density lipoprotein receptor-related protein 1 (LRP-1) (Alpha-2-macroglobulin receptor) (A2MR) (Apolipoprotein E receptor) (APOER) (CD antigen CD91) [Cleaved into: Low-density lipoprotein receptor-related protein 1 85 kDa subunit (LRP-85); Low-density lipoprotein receptor-related protein 1 515 kDa subunit (LRP-515); Low-density lipoprotein receptor-related protein 1 intracellular domain (L…	0.099603	0.634717
GALM_HUMAN	3	GALM BLOCK25	Aldose 1-epimerase (EC 5.1.3.3) (Galactose mutarotase)	0.0980247	0.743265
ALBU_HUMAN	32	ALB GIG20 GIG42 PRO0903 PRO1708 PRO2044 PRO2619 PRO2675 UNQ696/PRO1341	Serum albumin	0.0941473	0.859182
SRC8_HUMAN	3	CTTN EMS1	Src substrate cortactin (Amplaxin) (Oncogene EMS1)	0.0922542	0.774455
MK03_HUMAN	4	MAPK3 ERK1 PRKM3	Mitogen-activated protein kinase 3 (MAP kinase 3) (MAPK 3) (EC 2.7.11.24) (ERT2) (Extracellular signal-regulated kinase 1) (ERK-1) (Insulin-stimulated MAP2 kinase) (MAP kinase isoform p44) (p44-MAPK) (Microtubule-associated protein 2 kinase) (p44-ERK1)	0.0913677	0.791529
SRRT_HUMAN	3	SRRT ARS2 ASR2	Serrate RNA effector molecule homolog (Arsenite-resistance protein 2)	0.0840268	0.85056
NB5R3_HUMAN	13	CYB5R3 DIA1	NADH-cytochrome b5 reductase 3 (B5R) (Cytochrome b5 reductase) (EC 1.6.2.2) (Diaphorase-1) [Cleaved into: NADH-cytochrome b5 reductase 3 membrane-bound form; NADH-cytochrome b5 reductase 3 soluble form]	0.0788683	0.803058
MDHC_HUMAN	6	MDH1 MDHA	Malate dehydrogenase, cytoplasmic (EC 1.1.1.37) (Cytosolic malate dehydrogenase) (Diiodophenylpyruvate reductase) (EC 1.1.1.96)	0.078284	0.795267
H10_HUMAN	3	H1F0 H1FV	Histone H1.0 (Histone H1') (Histone H1(0)) [Cleaved into: Histone H1.0, N-terminally processed]	0.0758088	0.819127
GLGB_HUMAN	6	GBE1	1,4-alpha-glucan-branching enzyme (EC 2.4.1.18) (Brancher enzyme) (Glycogen-branching enzyme)	0.0706532	0.849851
KNG1_HUMAN	4	KNG1 BDK KNG	Kininogen-1 (Alpha-2-thiol proteinase inhibitor) (Fitzgerald factor) (High molecular weight kininogen) (HMWK) (Williams-Fitzgerald-Flaujeac factor) [Cleaved into: Kininogen-1 heavy chain; T-kinin (Ile-Ser-Bradykinin); Bradykinin (Kallidin I); Lysyl-bradykinin (Kallidin II); Kininogen-1 light chain; Low molecular weight growth-promoting factor]	0.069119	0.788749
PEBP1_HUMAN	10	PEBP1 PBP PEBP	Phosphatidylethanolamine-binding protein 1 (PEBP-1) (HCNPpp) (Neuropolypeptide h3) (Prostatic-binding protein) (Raf kinase inhibitor protein) (RKIP) [Cleaved into: Hippocampal cholinergic neurostimulating peptide (HCNP)]	0.059617	0.901877
ANXA7_HUMAN	5	ANXA7 ANX7 SNX OK/SW-cl.95	Annexin A7 (Annexin VII) (Annexin-7) (Synexin)	0.0521603	0.887201
PSMA8_HUMAN	3	PSMA8 PSMA7L	Proteasome subunit alpha-type 8 (EC 3.4.25.1) (Proteasome subunit alpha-type 7-like)	0.0438134	0.887201
TBB6_HUMAN	8	TUBB6	Tubulin beta-6 chain (Tubulin beta class V)	0.0329444	0.959906
COR1C_HUMAN	5	CORO1C CRN2 CRNN4	Coronin-1C (Coronin-3) (hCRNN4)	0.0318066	0.939625
MAP4_HUMAN	10	MAP4	Microtubule-associated protein 4 (MAP-4)	0.0294094	0.872525
1433Z_HUMAN	8	YWHAZ	14-3-3 protein zeta/delta (Protein kinase C inhibitor protein 1) (KCIP-1)	0.0276734	0.940172
ZYX_HUMAN	8	ZYX	Zyxin (Zyxin-2)	0.0253101	0.921706
P4K2A_HUMAN	3	PI4K2A	Phosphatidylinositol 4-kinase type 2-alpha (EC 2.7.1.67) (Phosphatidylinositol 4-kinase type II-alpha)	0.0209805	0.967746
APOA1_HUMAN	18	APOA1	Apolipoprotein A-I (Apo-AI) (ApoA-I) (Apolipoprotein A1) [Cleaved into: Proapolipoprotein A-I (ProapoA-I); Truncated apolipoprotein A-I (Apolipoprotein A-I(1-242))]	0.00921617	0.977857
IGJ_HUMAN	3	JCHAIN IGCJ IGJ	Immunoglobulin J chain (Joining chain of multimeric IgA and IgM)	0.00327328	0.992238
PURA_HUMAN	4	PURA PUR1	Transcriptional activator protein Pur-alpha (Purine-rich single-stranded DNA-binding protein alpha)	0.00321648	0.992238
KAP0_HUMAN	4	PRKAR1A PKR1 PRKAR1 TSE1	cAMP-dependent protein kinase type I-alpha regulatory subunit (Tissue-specific extinguisher 1) (TSE1)	-0.000614577	0.998267
ACTBM_HUMAN	3	POTEKP ACTBL3 FKSG30	Putative beta-actin-like protein 3 (Kappa-actin) (POTE ankyrin domain family member K)	-0.00556129	0.992238
GSTT1_HUMAN	6	GSTT1	Glutathione S-transferase theta-1 (EC 2.5.1.18) (GST class-theta-1) (Glutathione transferase T1-1)	-0.00906989	0.975387
S10A6_HUMAN	6	S100A6 CACY	Protein S100-A6 (Calcyclin) (Growth factor-inducible protein 2A9) (MLN 4) (Prolactin receptor-associated protein) (PRA) (S100 calcium-binding protein A6)	-0.0307074	0.93549
ZO1_HUMAN	3	TJP1 ZO1	Tight junction protein ZO-1 (Tight junction protein 1) (Zona occludens protein 1) (Zonula occludens protein 1)	-0.0314704	0.953507
SMCA2_HUMAN	3	SMARCA2 BAF190B BRM SNF2A SNF2L2	Probable global transcription activator SNF2L2 (EC 3.6.4.-) (ATP-dependent helicase SMARCA2) (BRG1-associated factor 190B) (BAF190B) (Protein brahma homolog) (hBRM) (SNF2-alpha) (SWI/SNF-related matrix-associated actin-dependent regulator of chromatin subfamily A member 2)	-0.0322877	0.953507
NCKP1_HUMAN	3	NCKAP1 HEM2 KIAA0587 NAP1	Nck-associated protein 1 (NAP 1) (Membrane-associated protein HEM-2) (p125Nap1)	-0.0333376	0.919904
PGAM1_HUMAN	8	PGAM1 PGAMA CDABP0006	Phosphoglycerate mutase 1 (EC 5.4.2.11) (EC 5.4.2.4) (BPG-dependent PGAM 1) (Phosphoglycerate mutase isozyme B) (PGAM-B)	-0.0391875	0.859363
VTDB_HUMAN	4	GC	Vitamin D-binding protein (DBP) (VDB) (Gc protein-derived macrophage activating factor) (Gc-MAF) (GcMAF) (Gc-globulin) (Group-specific component) (Gc) (Vitamin D-binding protein-macrophage activating factor) (DBP-maf)	-0.0406585	0.910151
K2C1B_HUMAN	3	KRT77 KRT1B	Keratin, type II cytoskeletal 1b (Cytokeratin-1B) (CK-1B) (Keratin-77) (K77) (Type-II keratin Kb39)	-0.0412954	0.913651
CAV1_HUMAN	5	CAV1 CAV	Caveolin-1	-0.0420923	0.904204
ANX11_HUMAN	11	ANXA11 ANX11	Annexin A11 (56 kDa autoantigen) (Annexin XI) (Annexin-11) (Calcyclin-associated annexin 50) (CAP-50)	-0.0464836	0.844993
AT2B4_HUMAN	4	ATP2B4 ATP2B2 MXRA1	Plasma membrane calcium-transporting ATPase 4 (PMCA4) (EC 7.2.2.10) (Matrix-remodeling-associated protein 1) (Plasma membrane calcium ATPase isoform 4) (Plasma membrane calcium pump isoform 4)	-0.0658294	0.873251
NDUS2_HUMAN	4	NDUFS2	NADH dehydrogenase [ubiquinone] iron-sulfur protein 2, mitochondrial (EC 1.6.99.3) (EC 7.1.1.2) (Complex I-49kD) (CI-49kD) (NADH-ubiquinone oxidoreductase 49 kDa subunit)	-0.0681011	0.872727
TBA4A_HUMAN	3	TUBA4A TUBA1	Tubulin alpha-4A chain (Alpha-tubulin 1) (Testis-specific alpha-tubulin) (Tubulin H2-alpha) (Tubulin alpha-1 chain)	-0.0712768	0.859363
RU17_HUMAN	3	SNRNP70 RNPU1Z RPU1 SNRP70 U1AP1	U1 small nuclear ribonucleoprotein 70 kDa (U1 snRNP 70 kDa) (U1-70K) (snRNP70)	-0.0754457	0.876541
CE290_HUMAN	10	CEP290 BBS14 KIAA0373 NPHP6	Centrosomal protein of 290 kDa (Cep290) (Bardet-Biedl syndrome 14 protein) (Cancer/testis antigen 87) (CT87) (Nephrocystin-6) (Tumor antigen se2-2)	-0.079237	0.798844
LDHA_HUMAN	11	LDHA PIG19	L-lactate dehydrogenase A chain (LDH-A) (EC 1.1.1.27) (Cell proliferation-inducing gene 19 protein) (LDH muscle subunit) (LDH-M) (Renal carcinoma antigen NY-REN-59)	-0.0820117	0.656534
KCC2D_HUMAN	3	CAMK2D CAMKD	Calcium/calmodulin-dependent protein kinase type II subunit delta (CaM kinase II subunit delta) (CaMK-II subunit delta) (EC 2.7.11.17)	-0.0822365	0.623536
F10A5_HUMAN	3	ST13P5 FAM10A5	Putative protein FAM10A5 (Suppression of tumorigenicity 13 pseudogene 5)	-0.0887661	0.812278
FIBG_HUMAN	16	FGG PRO2061	Fibrinogen gamma chain	-0.0890197	0.822206
MYO1C_HUMAN	36	MYO1C	Unconventional myosin-Ic (Myosin I beta) (MMI-beta) (MMIb)	-0.0946105	0.887821
SAE2_HUMAN	3	UBA2 SAE2 UBLE1B HRIHFB2115	SUMO-activating enzyme subunit 2 (EC 2.3.2.-) (Anthracycline-associated resistance ARX) (Ubiquitin-like 1-activating enzyme E1B) (Ubiquitin-like modifier-activating enzyme 2)	-0.0984599	0.76185
SEPT2_HUMAN	8	SEPT2 DIFF6 KIAA0158 NEDD5	Septin-2 (Neural precursor cell expressed developmentally down-regulated protein 5) (NEDD-5)	-0.103157	0.719434
PLD5_HUMAN	3	PLD5	Inactive phospholipase D5 (Inactive PLD 5) (Inactive choline phosphatase 5) (Inactive phosphatidylcholine-hydrolyzing phospholipase D5) (PLDc)	-0.105192	0.81632
PSMD5_HUMAN	4	PSMD5 KIAA0072	26S proteasome non-ATPase regulatory subunit 5 (26S protease subunit S5 basic) (26S proteasome subunit S5B)	-0.105626	0.749535
1433B_HUMAN	6	YWHAB	14-3-3 protein beta/alpha (Protein 1054) (Protein kinase C inhibitor protein 1) (KCIP-1) [Cleaved into: 14-3-3 protein beta/alpha, N-terminally processed]	-0.107202	0.515962
IGHG3_HUMAN	10	IGHG3	Immunoglobulin heavy constant gamma 3 (HDC) (Heavy chain disease protein) (Ig gamma-3 chain C region)	-0.107479	0.910426
STAT6_HUMAN	3	STAT6	Signal transducer and activator of transcription 6 (IL-4 Stat)	-0.108818	0.745715
A0A0G2JL54_HUMAN	17	C4B_2 C4B	Complement C4-B	-0.114568	0.614701
ATP5J_HUMAN	3	ATP5PF ATP5A ATP5J ATPM	ATP synthase-coupling factor 6, mitochondrial (ATPase subunit F6) (ATP synthase peripheral stalk subunit F6)	-0.118281	0.746225
PUR9_HUMAN	4	ATIC PURH OK/SW-cl.86	Bifunctional purine biosynthesis protein PURH [Cleaved into: Bifunctional purine biosynthesis protein PURH, N-terminally processed] [Includes: Phosphoribosylaminoimidazolecarboxamide formyltransferase (EC 2.1.2.3) (5-aminoimidazole-4-carboxamide ribonucleotide formyltransferase) (AICAR transformylase); IMP cyclohydrolase (EC 3.5.4.10) (ATIC) (IMP synthase) (Inosinicase)]	-0.118639	0.618816
FIBB_HUMAN	26	FGB	Fibrinogen beta chain [Cleaved into: Fibrinopeptide B; Fibrinogen beta chain]	-0.11874	0.651025
TPP2_HUMAN	3	TPP2	Tripeptidyl-peptidase 2 (TPP-2) (EC 3.4.14.10) (Tripeptidyl aminopeptidase) (Tripeptidyl-peptidase II) (TPP-II)	-0.124616	0.76185
CAP1_HUMAN	10	CAP1 CAP	Adenylyl cyclase-associated protein 1 (CAP 1)	-0.125702	0.61902
PSA_HUMAN	11	NPEPPS PSA	Puromycin-sensitive aminopeptidase (PSA) (EC 3.4.11.14) (Cytosol alanyl aminopeptidase) (AAP-S)	-0.127276	0.585184
TAGL2_HUMAN	12	TAGLN2 KIAA0120 CDABP0035	Transgelin-2 (Epididymis tissue protein Li 7e) (SM22-alpha homolog)	-0.127779	0.718782
HV374_HUMAN	4	IGHV3-74	Immunoglobulin heavy variable 3-74	-0.144783	0.311802
COR1B_HUMAN	8	CORO1B	Coronin-1B (Coronin-2)	-0.146542	0.549634
GFPT1_HUMAN	4	GFPT1 GFAT GFPT	Glutamine--fructose-6-phosphate aminotransferase [isomerizing] 1 (EC 2.6.1.16) (D-fructose-6-phosphate amidotransferase 1) (Glutamine:fructose-6-phosphate amidotransferase 1) (GFAT 1) (GFAT1) (Hexosephosphate aminotransferase 1)	-0.149348	0.674599
H0Y7A7_HUMAN	8	CALM2	Calmodulin-2 (Fragment)	-0.153805	0.563541
CO3_HUMAN	60	C3 CPAMD1	Complement C3 (C3 and PZP-like alpha-2-macroglobulin domain-containing protein 1) [Cleaved into: Complement C3 beta chain; C3-beta-c (C3bc); Complement C3 alpha chain; C3a anaphylatoxin; Acylation stimulating protein (ASP) (C3adesArg); Complement C3b alpha' chain; Complement C3c alpha' chain fragment 1; Complement C3dg fragment; Complement C3g fragment; Complement C3d fragment; Complement C3f fra…	-0.15904	0.610414
TBCA_HUMAN	5	TBCA	Tubulin-specific chaperone A (TCP1-chaperonin cofactor A) (Tubulin-folding cofactor A) (CFA)	-0.161512	0.651543
TRFE_HUMAN	14	TF PRO1400	Serotransferrin (Transferrin) (Beta-1 metal-binding globulin) (Siderophilin)	-0.173523	0.455938
SC23A_HUMAN	3	SEC23A	Protein transport protein Sec23A (hSec23A) (SEC23-related protein A)	-0.176246	0.543178
QOR_HUMAN	7	CRYZ	Quinone oxidoreductase (EC 1.6.5.5) (NADPH:quinone reductase) (Zeta-crystallin)	-0.191073	0.515242
NDUAD_HUMAN	3	NDUFA13 GRIM19 CDA016 CGI-39	NADH dehydrogenase [ubiquinone] 1 alpha subcomplex subunit 13 (Cell death regulatory protein GRIM-19) (Complex I-B16.6) (CI-B16.6) (Gene associated with retinoic and interferon-induced mortality 19 protein) (GRIM-19) (Gene associated with retinoic and IFN-induced mortality 19 protein) (NADH-ubiquinone oxidoreductase B16.6 subunit)	-0.194688	0.6757
AK1C4_HUMAN	5	AKR1C4 CHDR	Aldo-keto reductase family 1 member C4 (EC 1.1.1.-) (3-alpha-HSD1) (3-alpha-hydroxysteroid dehydrogenase type I) (EC 1.1.1.357) (Chlordecone reductase) (CDR) (EC 1.1.1.225) (Dihydrodiol dehydrogenase 4) (DD-4) (DD4) (HAKRA)	-0.198808	0.0270935
CSN2_HUMAN	3	COPS2 CSN2 TRIP15	COP9 signalosome complex subunit 2 (SGN2) (Signalosome subunit 2) (Alien homolog) (JAB1-containing signalosome subunit 2) (Thyroid receptor-interacting protein 15) (TR-interacting protein 15) (TRIP-15)	-0.206768	0.586566
TGO1_HUMAN	3	MIA3 KIAA0268 TANGO UNQ6077/PRO20088	Transport and Golgi organization protein 1 homolog (TANGO1) (C219-reactive peptide) (D320) (Melanoma inhibitory activity protein 3)	-0.207249	0.679423
PSD12_HUMAN	4	PSMD12	26S proteasome non-ATPase regulatory subunit 12 (26S proteasome regulatory subunit RPN5) (26S proteasome regulatory subunit p55)	-0.209051	0.563541
UBA1_HUMAN	19	UBA1 A1S9T UBE1	Ubiquitin-like modifier-activating enzyme 1 (EC 6.2.1.45) (Protein A1S9) (Ubiquitin-activating enzyme E1)	-0.21086	0.252506
CKAP5_HUMAN	5	CKAP5 KIAA0097	Cytoskeleton-associated protein 5 (Colonic and hepatic tumor overexpressed gene protein) (Ch-TOG)	-0.220655	0.494623
PACN2_HUMAN	6	PACSIN2	Protein kinase C and casein kinase substrate in neurons protein 2 (Syndapin-2) (Syndapin-II)	-0.223482	0.320188
KAD1_HUMAN	6	AK1	Adenylate kinase isoenzyme 1 (AK 1) (EC 2.7.4.3) (EC 2.7.4.6) (ATP-AMP transphosphorylase 1) (ATP:AMP phosphotransferase) (Adenylate monophosphate kinase) (Myokinase)	-0.227593	0.498172
UBE2N_HUMAN	4	UBE2N BLU	Ubiquitin-conjugating enzyme E2 N (EC 2.3.2.23) (Bendless-like ubiquitin-conjugating enzyme) (E2 ubiquitin-conjugating enzyme N) (Ubc13) (UbcH13) (Ubiquitin carrier protein N) (Ubiquitin-protein ligase N)	-0.242667	0.436434
GGCT_HUMAN	3	GGCT C7orf24 CRF21	Gamma-glutamylcyclotransferase (EC 4.3.2.9) (Cytochrome c-releasing factor 21)	-0.243534	0.549634
SNX5_HUMAN	4	SNX5	Sorting nexin-5	-0.248147	0.567792
AATC_HUMAN	3	GOT1	Aspartate aminotransferase, cytoplasmic (cAspAT) (EC 2.6.1.1) (EC 2.6.1.3) (Cysteine aminotransferase, cytoplasmic) (Cysteine transaminase, cytoplasmic) (cCAT) (Glutamate oxaloacetate transaminase 1) (Transaminase A)	-0.249012	0.444204
HEM2_HUMAN	3	ALAD	Delta-aminolevulinic acid dehydratase (ALADH) (EC 4.2.1.24) (Porphobilinogen synthase)	-0.250838	0.453888
CEIP2_HUMAN	3	CEMIP2 KIAA1412 TMEM2	Cell surface hyaluronidase (EC 3.2.1.35) (Cell migration-inducing hyaluronidase 2) (Transmembrane protein 2)	-0.252576	0.478966
GDIA_HUMAN	4	GDI1 GDIL OPHN2 RABGDIA XAP4	Rab GDP dissociation inhibitor alpha (Rab GDI alpha) (Guanosine diphosphate dissociation inhibitor 1) (GDI-1) (Oligophrenin-2) (Protein XAP-4)	-0.253043	0.437549
RL19_HUMAN	3	RPL19	60S ribosomal protein L19 (Large ribosomal subunit protein eL19)	-0.254432	0.434322
NEDD4_HUMAN	3	NEDD4 KIAA0093 NEDD4-1 PIG53	E3 ubiquitin-protein ligase NEDD4 (EC 2.3.2.26) (Cell proliferation-inducing gene 53 protein) (HECT-type E3 ubiquitin transferase NEDD4) (Neural precursor cell expressed developmentally down-regulated protein 4) (NEDD-4)	-0.261086	0.489159
ARL8A_HUMAN	4	ARL8A ARL10B GIE2	ADP-ribosylation factor-like protein 8A (ADP-ribosylation factor-like protein 10B) (Novel small G protein indispensable for equal chromosome segregation 2)	-0.26274	0.524838
PLMN_HUMAN	5	PLG	Plasminogen (EC 3.4.21.7) [Cleaved into: Plasmin heavy chain A; Activation peptide; Angiostatin; Plasmin heavy chain A, short form; Plasmin light chain B]	-0.263237	0.320598
TCPB_HUMAN	4	CCT2 99D8.1 CCTB	T-complex protein 1 subunit beta (TCP-1-beta) (CCT-beta)	-0.269139	0.305673
PSB6_HUMAN	3	PSMB6 LMPY Y	Proteasome subunit beta type-6 (EC 3.4.25.1) (Macropain delta chain) (Multicatalytic endopeptidase complex delta chain) (Proteasome delta chain) (Proteasome subunit Y)	-0.270952	0.407757
VASP_HUMAN	6	VASP	Vasodilator-stimulated phosphoprotein (VASP)	-0.284908	0.238335
DC1I2_HUMAN	4	DYNC1I2 DNCI2 DNCIC2	Cytoplasmic dynein 1 intermediate chain 2 (Cytoplasmic dynein intermediate chain 2) (Dynein intermediate chain 2, cytosolic) (DH IC-2)	-0.28928	0.401977
THRB_HUMAN	4	F2	Prothrombin (EC 3.4.21.5) (Coagulation factor II) [Cleaved into: Activation peptide fragment 1; Activation peptide fragment 2; Thrombin light chain; Thrombin heavy chain]	-0.290804	0.453568
STIP1_HUMAN	7	STIP1	Stress-induced-phosphoprotein 1 (STI1) (Hsc70/Hsp90-organizing protein) (Hop) (Renal carcinoma antigen NY-REN-11) (Transformation-sensitive protein IEF SSP 3521)	-0.293482	0.124529
KPYM_HUMAN	25	PKM OIP3 PK2 PK3 PKM2	Pyruvate kinase PKM (EC 2.7.1.40) (Cytosolic thyroid hormone-binding protein) (CTHBP) (Opa-interacting protein 3) (OIP-3) (Pyruvate kinase 2/3) (Pyruvate kinase muscle isozyme) (Thyroid hormone-binding protein 1) (THBP1) (Tumor M2-PK) (p58)	-0.299957	0.630813
GRHPR_HUMAN	3	GRHPR GLXR MSTP035	Glyoxylate reductase/hydroxypyruvate reductase (EC 1.1.1.79) (EC 1.1.1.81)	-0.300098	0.338866
TF65_HUMAN	3	RELA NFKB3	Transcription factor p65 (Nuclear factor NF-kappa-B p65 subunit) (Nuclear factor of kappa light polypeptide gene enhancer in B-cells 3)	-0.307213	0.453888
GLOD4_HUMAN	3	GLOD4 C17orf25 CGI-150 My027	Glyoxalase domain-containing protein 4	-0.309281	0.273286
TYB4_HUMAN	3	TMSB4X TB4X THYB4 TMSB4	Thymosin beta-4 (T beta-4) (Fx) [Cleaved into: Hematopoietic system regulatory peptide (Seraspenide)]	-0.31035	0.387697
DCTN1_HUMAN	8	DCTN1	Dynactin subunit 1 (150 kDa dynein-associated polypeptide) (DAP-150) (DP-150) (p135) (p150-glued)	-0.312475	0.215326
FLNB_HUMAN	18	FLNB FLN1L FLN3 TABP TAP	Filamin-B (FLN-B) (ABP-278) (ABP-280 homolog) (Actin-binding-like protein) (Beta-filamin) (Filamin homolog 1) (Fh1) (Filamin-3) (Thyroid autoantigen) (Truncated actin-binding protein) (Truncated ABP)	-0.313447	0.0442113
ANXA5_HUMAN	23	ANXA5 ANX5 ENX2 PP4	Annexin A5 (Anchorin CII) (Annexin V) (Annexin-5) (Calphobindin I) (CBP-I) (Endonexin II) (Lipocortin V) (Placental anticoagulant protein 4) (PP4) (Placental anticoagulant protein I) (PAP-I) (Thromboplastin inhibitor) (Vascular anticoagulant-alpha) (VAC-alpha)	-0.313589	0.366451
PSMD8_HUMAN	3	PSMD8	26S proteasome non-ATPase regulatory subunit 8 (26S proteasome regulatory subunit RPN12) (26S proteasome regulatory subunit S14) (p31)	-0.313871	0.355718
PSB3_HUMAN	4	PSMB3	Proteasome subunit beta type-3 (EC 3.4.25.1) (Proteasome chain 13) (Proteasome component C10-II) (Proteasome theta chain)	-0.321368	0.186396
PROF1_HUMAN	7	PFN1	Profilin-1 (Epididymis tissue protein Li 184a) (Profilin I)	-0.321739	0.416802
PTN11_HUMAN	3	PTPN11 PTP2C SHPTP2	Tyrosine-protein phosphatase non-receptor type 11 (EC 3.1.3.48) (Protein-tyrosine phosphatase 1D) (PTP-1D) (Protein-tyrosine phosphatase 2C) (PTP-2C) (SH-PTP2) (SHP-2) (Shp2) (SH-PTP3)	-0.323437	0.279337
MYOF_HUMAN	25	MYOF FER1L3 KIAA1207	Myoferlin (Fer-1-like protein 3)	-0.324396	0.0403245
SYK_HUMAN	4	KARS KIAA0070	Lysine--tRNA ligase (EC 2.7.7.-) (EC 6.1.1.6) (Lysyl-tRNA synthetase) (LysRS)	-0.328683	0.290564
RINI_HUMAN	6	RNH1 PRI RNH	Ribonuclease inhibitor (Placental ribonuclease inhibitor) (Placental RNase inhibitor) (Ribonuclease/angiogenin inhibitor 1) (RAI)	-0.329824	0.382148
NDUV2_HUMAN	3	NDUFV2	NADH dehydrogenase [ubiquinone] flavoprotein 2, mitochondrial (EC 1.6.99.3) (EC 7.1.1.2) (NADH-ubiquinone oxidoreductase 24 kDa subunit)	-0.331103	0.223234
ANXA4_HUMAN	16	ANXA4 ANX4	Annexin A4 (35-beta calcimedin) (Annexin IV) (Annexin-4) (Carbohydrate-binding protein p33/p41) (Chromobindin-4) (Endonexin I) (Lipocortin IV) (P32.5) (PP4-X) (Placental anticoagulant protein II) (PAP-II) (Protein II)	-0.334171	0.173263
PP1R7_HUMAN	4	PPP1R7 SDS22	Protein phosphatase 1 regulatory subunit 7 (Protein phosphatase 1 regulatory subunit 22)	-0.334965	0.437549
TBB2A_HUMAN	20	TUBB2A TUBB2	Tubulin beta-2A chain (Tubulin beta class IIa)	-0.339264	0.73566
CBR1_HUMAN	8	CBR1 CBR CRN SDR21C1	Carbonyl reductase [NADPH] 1 (EC 1.1.1.184) (15-hydroxyprostaglandin dehydrogenase [NADP(+)]) (EC 1.1.1.197) (NADPH-dependent carbonyl reductase 1) (Prostaglandin 9-ketoreductase) (Prostaglandin-E(2) 9-reductase) (EC 1.1.1.189) (Short chain dehydrogenase/reductase family 21C member 1)	-0.343388	0.087409
TCPE_HUMAN	4	CCT5 CCTE KIAA0098	T-complex protein 1 subunit epsilon (TCP-1-epsilon) (CCT-epsilon)	-0.346382	0.241401
TBB4B_HUMAN	7	TUBB4B TUBB2C	Tubulin beta-4B chain (Tubulin beta-2 chain) (Tubulin beta-2C chain)	-0.34844	0.749226
GIMA1_HUMAN	4	GIMAP1 IMAP1	GTPase IMAP family member 1 (Immunity-associated protein 1) (hIMAP1)	-0.354737	0.326476
CPNE3_HUMAN	3	CPNE3 CPN3 KIAA0636	Copine-3 (Copine III)	-0.356103	0.403341
PSMD3_HUMAN	11	PSMD3	26S proteasome non-ATPase regulatory subunit 3 (26S proteasome regulatory subunit RPN3) (26S proteasome regulatory subunit S3) (Proteasome subunit p58)	-0.360984	0.186396
CAPR1_HUMAN	3	CAPRIN1 GPIAP1 GPIP137 M11S1 RNG105	Caprin-1 (Cell cycle-associated protein 1) (Cytoplasmic activation- and proliferation-associated protein 1) (GPI-anchored membrane protein 1) (GPI-anchored protein p137) (GPI-p137) (p137GPI) (Membrane component chromosome 11 surface marker 1) (RNA granule protein 105)	-0.361142	0.468164
IGKC_HUMAN	8	IGKC	Immunoglobulin kappa constant (Ig kappa chain C region) (Ig kappa chain C region AG) (Ig kappa chain C region CUM) (Ig kappa chain C region EU) (Ig kappa chain C region OU) (Ig kappa chain C region ROY) (Ig kappa chain C region TI)	-0.365731	0.610414
IMDH2_HUMAN	3	IMPDH2 IMPD2	Inosine-5'-monophosphate dehydrogenase 2 (IMP dehydrogenase 2) (IMPD 2) (IMPDH 2) (EC 1.1.1.205) (IMPDH-II)	-0.366343	0.396668
ITIH2_HUMAN	4	ITIH2 IGHEP2	Inter-alpha-trypsin inhibitor heavy chain H2 (ITI heavy chain H2) (ITI-HC2) (Inter-alpha-inhibitor heavy chain 2) (Inter-alpha-trypsin inhibitor complex component II) (Serum-derived hyaluronan-associated protein) (SHAP)	-0.367262	0.260287
ECI1_HUMAN	4	ECI1 DCI	Enoyl-CoA delta isomerase 1, mitochondrial (EC 5.3.3.8) (3,2-trans-enoyl-CoA isomerase) (Delta(3),Delta(2)-enoyl-CoA isomerase) (D3,D2-enoyl-CoA isomerase) (Dodecenoyl-CoA isomerase)	-0.371057	0.179869
HSP74_HUMAN	4	HSPA4 APG2	Heat shock 70 kDa protein 4 (HSP70RY) (Heat shock 70-related protein APG-2)	-0.374306	0.215442
TCPA_HUMAN	6	TCP1 CCT1 CCTA	T-complex protein 1 subunit alpha (TCP-1-alpha) (CCT-alpha)	-0.375377	0.243378
SNX3_HUMAN	3	SNX3	Sorting nexin-3 (Protein SDP3)	-0.375497	0.20937
FLOT1_HUMAN	7	FLOT1	Flotillin-1	-0.376808	0.107436
ACTZ_HUMAN	3	ACTR1A CTRN1	Alpha-centractin (Centractin) (ARP1) (Actin-RPV) (Centrosome-associated actin homolog)	-0.381209	0.206178
PLST_HUMAN	20	PLS3	Plastin-3 (T-plastin)	-0.382392	0.287358
C1TC_HUMAN	7	MTHFD1 MTHFC MTHFD	C-1-tetrahydrofolate synthase, cytoplasmic (C1-THF synthase) [Cleaved into: C-1-tetrahydrofolate synthase, cytoplasmic, N-terminally processed] [Includes: Methylenetetrahydrofolate dehydrogenase (EC 1.5.1.5); Methenyltetrahydrofolate cyclohydrolase (EC 3.5.4.9); Formyltetrahydrofolate synthetase (EC 6.3.4.3)]	-0.383165	0.246359
SART3_HUMAN	5	SART3 KIAA0156 TIP110	Squamous cell carcinoma antigen recognized by T-cells 3 (SART-3) (Tat-interacting protein of 110 kDa) (Tip110) (p110 nuclear RNA-binding protein)	-0.38843	0.171144
SEPT7_HUMAN	6	SEPT7 CDC10	Septin-7 (CDC10 protein homolog)	-0.391238	0.234398
AGRIN_HUMAN	4	AGRN AGRIN	Agrin [Cleaved into: Agrin N-terminal 110 kDa subunit; Agrin C-terminal 110 kDa subunit; Agrin C-terminal 90 kDa fragment (C90); Agrin C-terminal 22 kDa fragment (C22)]	-0.391914	0.340673
BEND7_HUMAN	4	BEND7 C10orf30	BEN domain-containing protein 7	-0.39562	0.275191
GNA11_HUMAN	6	GNA11 GA11	Guanine nucleotide-binding protein subunit alpha-11 (G alpha-11) (G-protein subunit alpha-11) (Guanine nucleotide-binding protein G(y) subunit alpha)	-0.395832	0.0373429
ITAX_HUMAN	3	ITGAX CD11C	Integrin alpha-X (CD11 antigen-like family member C) (Leu M5) (Leukocyte adhesion glycoprotein p150,95 alpha chain) (Leukocyte adhesion receptor p150,95) (CD antigen CD11c)	-0.396023	0.439609
PGRC1_HUMAN	5	PGRMC1 HPR6.6 PGRMC	Membrane-associated progesterone receptor component 1 (mPR) (Dap1) (IZA)	-0.397265	0.216499
AFG32_HUMAN	4	AFG3L2	AFG3-like protein 2 (EC 3.4.24.-) (Paraplegin-like protein)	-0.397414	0.327683
IGHG4_HUMAN	5	IGHG4	Immunoglobulin heavy constant gamma 4 (Ig gamma-4 chain C region)	-0.398437	0.695358
KV315_HUMAN	3	IGKV3-15	Immunoglobulin kappa variable 3-15 (Ig kappa chain V-III region CLL) (Ig kappa chain V-III region POM)	-0.40246	0.193218
RHG18_HUMAN	3	ARHGAP18	Rho GTPase-activating protein 18 (MacGAP) (Rho-type GTPase-activating protein 18)	-0.403043	0.475927
ERG7_HUMAN	4	LSS OSC	Lanosterol synthase (EC 5.4.99.7) (2,3-epoxysqualene--lanosterol cyclase) (Oxidosqualene--lanosterol cyclase) (OSC) (hOSC)	-0.409054	0.320546
G6PI_HUMAN	11	GPI	Glucose-6-phosphate isomerase (GPI) (EC 5.3.1.9) (Autocrine motility factor) (AMF) (Neuroleukin) (NLK) (Phosphoglucose isomerase) (PGI) (Phosphohexose isomerase) (PHI) (Sperm antigen 36) (SA-36)	-0.411506	0.145783
SORT_HUMAN	3	SORT1	Sortilin (100 kDa NT receptor) (Glycoprotein 95) (Gp95) (Neurotensin receptor 3) (NT3) (NTR3)	-0.414979	0.453568
SPB3_HUMAN	7	SERPINB3 SCCA SCCA1	Serpin B3 (Protein T4-A) (Squamous cell carcinoma antigen 1) (SCCA-1)	-0.416662	0.160721
ZA2G_HUMAN	9	AZGP1 ZAG ZNGP1	Zinc-alpha-2-glycoprotein (Zn-alpha-2-GP) (Zn-alpha-2-glycoprotein)	-0.416806	0.0742716
KTN1_HUMAN	9	KTN1 CG1 KIAA0004	Kinectin (CG-1 antigen) (Kinesin receptor)	-0.417141	0.0892715
LMNA_HUMAN	50	LMNA LMN1	Prelamin-A/C [Cleaved into: Lamin-A/C (70 kDa lamin) (Renal carcinoma antigen NY-REN-32)]	-0.417925	0.504549
LIS1_HUMAN	5	PAFAH1B1 LIS1 MDCR MDS PAFAHA	Platelet-activating factor acetylhydrolase IB subunit alpha (Lissencephaly-1 protein) (LIS-1) (PAF acetylhydrolase 45 kDa subunit) (PAF-AH 45 kDa subunit) (PAF-AH alpha) (PAFAH alpha)	-0.418271	0.166898
OTUB1_HUMAN	5	OTUB1 OTB1 OTU1 HSPC263	Ubiquitin thioesterase OTUB1 (EC 3.4.19.12) (Deubiquitinating enzyme OTUB1) (OTU domain-containing ubiquitin aldehyde-binding protein 1) (Otubain-1) (hOTU1) (Ubiquitin-specific-processing protease OTUB1)	-0.418475	0.118146
HXK1_HUMAN	9	HK1	Hexokinase-1 (EC 2.7.1.1) (Brain form hexokinase) (Hexokinase type I) (HK I)	-0.424	0.111479
PSD13_HUMAN	6	PSMD13	26S proteasome non-ATPase regulatory subunit 13 (26S proteasome regulatory subunit RPN9) (26S proteasome regulatory subunit S11) (26S proteasome regulatory subunit p40.5)	-0.426163	0.0188491
IF4A2_HUMAN	7	EIF4A2 DDX2B EIF4F	Eukaryotic initiation factor 4A-II (eIF-4A-II) (eIF4A-II) (EC 3.6.4.13) (ATP-dependent RNA helicase eIF4A-2)	-0.430073	0.137572
ECHB_HUMAN	11	HADHB MSTP029	Trifunctional enzyme subunit beta, mitochondrial (TP-beta) [Includes: 3-ketoacyl-CoA thiolase (EC 2.3.1.16) (Acetyl-CoA acyltransferase) (Beta-ketothiolase)]	-0.432118	0.0688542
NDUS3_HUMAN	5	NDUFS3	NADH dehydrogenase [ubiquinone] iron-sulfur protein 3, mitochondrial (EC 1.6.99.3) (EC 7.1.1.2) (Complex I-30kD) (CI-30kD) (NADH-ubiquinone oxidoreductase 30 kDa subunit)	-0.432298	0.192854
DHB12_HUMAN	4	HSD17B12 SDR12C1	Very-long-chain 3-oxoacyl-CoA reductase (EC 1.1.1.330) (17-beta-hydroxysteroid dehydrogenase 12) (17-beta-HSD 12) (3-ketoacyl-CoA reductase) (KAR) (Estradiol 17-beta-dehydrogenase 12) (EC 1.1.1.62) (Short chain dehydrogenase/reductase family 12C member 1)	-0.432563	0.245297
RAB2B_HUMAN	6	RAB2B	Ras-related protein Rab-2B	-0.43287	0.369725
ADT1_HUMAN	4	SLC25A4 ANT1	ADP/ATP translocase 1 (ADP,ATP carrier protein 1) (ADP,ATP carrier protein, heart/skeletal muscle isoform T1) (Adenine nucleotide translocator 1) (ANT 1) (Solute carrier family 25 member 4)	-0.433519	0.229213
ZFR_HUMAN	3	ZFR	Zinc finger RNA-binding protein (hZFR) (M-phase phosphoprotein homolog)	-0.435594	0.366817
ATPG_HUMAN	6	ATP5F1C ATP5C ATP5C1 ATP5CL1	ATP synthase subunit gamma, mitochondrial (ATP synthase F1 subunit gamma) (F-ATPase gamma subunit)	-0.436009	0.234588
KAPCB_HUMAN	3	PRKACB	cAMP-dependent protein kinase catalytic subunit beta (PKA C-beta) (EC 2.7.11.11)	-0.438029	0.151426
TGM1_HUMAN	6	TGM1 KTG	Protein-glutamine gamma-glutamyltransferase K (EC 2.3.2.13) (Epidermal TGase) (Transglutaminase K) (TG(K)) (TGK) (TGase K) (Transglutaminase-1) (TGase-1)	-0.439781	0.106372
RAB6A_HUMAN	4	RAB6A RAB6	Ras-related protein Rab-6A (Rab-6)	-0.440458	0.191397
RB11B_HUMAN	8	RAB11B YPT3	Ras-related protein Rab-11B (GTP-binding protein YPT3)	-0.441264	0.0910809
ARK72_HUMAN	3	AKR7A2 AFAR AFAR1 AKR7	Aflatoxin B1 aldehyde reductase member 2 (EC 1.1.1.n11) (AFB1 aldehyde reductase 1) (AFB1-AR 1) (Aldoketoreductase 7) (Succinic semialdehyde reductase) (SSA reductase)	-0.445171	0.198181
PRDX2_HUMAN	13	PRDX2 NKEFB TDPX1	Peroxiredoxin-2 (EC 1.11.1.15) (Natural killer cell-enhancing factor B) (NKEF-B) (PRP) (Thiol-specific antioxidant protein) (TSA) (Thioredoxin peroxidase 1) (Thioredoxin-dependent peroxide reductase 1)	-0.446543	0.109863
LGUL_HUMAN	4	GLO1	Lactoylglutathione lyase (EC 4.4.1.5) (Aldoketomutase) (Glyoxalase I) (Glx I) (Ketone-aldehyde mutase) (Methylglyoxalase) (S-D-lactoylglutathione methylglyoxal lyase)	-0.448858	0.145783
COF1_HUMAN	3	CFL1 CFL	Cofilin-1 (18 kDa phosphoprotein) (p18) (Cofilin, non-muscle isoform)	-0.45207	0.141641
PSA3_HUMAN	5	PSMA3 HC8 PSC8	Proteasome subunit alpha type-3 (EC 3.4.25.1) (Macropain subunit C8) (Multicatalytic endopeptidase complex subunit C8) (Proteasome component C8)	-0.454296	0.315858
GSTO1_HUMAN	6	GSTO1 GSTTLP28	Glutathione S-transferase omega-1 (GSTO-1) (EC 2.5.1.18) (Glutathione S-transferase omega 1-1) (GSTO 1-1) (Glutathione-dependent dehydroascorbate reductase) (EC 1.8.5.1) (Monomethylarsonic acid reductase) (MMA(V) reductase) (EC 1.20.4.2) (S-(Phenacyl)glutathione reductase) (SPG-R)	-0.454345	0.17533
EHD4_HUMAN	13	EHD4 HCA10 HCA11 PAST4 FKSG7	EH domain-containing protein 4 (Hepatocellular carcinoma-associated protein 10/11) (PAST homolog 4)	-0.455356	0.0531245
GOGB1_HUMAN	6	GOLGB1	Golgin subfamily B member 1 (372 kDa Golgi complex-associated protein) (GCP372) (Giantin) (Macrogolgin)	-0.458229	0.166898
FLII_HUMAN	3	FLII FLIL	Protein flightless-1 homolog	-0.460512	0.248691
MK01_HUMAN	7	MAPK1 ERK2 PRKM1 PRKM2	Mitogen-activated protein kinase 1 (MAP kinase 1) (MAPK 1) (EC 2.7.11.24) (ERT1) (Extracellular signal-regulated kinase 2) (ERK-2) (MAP kinase isoform p42) (p42-MAPK) (Mitogen-activated protein kinase 2) (MAP kinase 2) (MAPK 2)	-0.468651	0.0817011
CAN2_HUMAN	5	CAPN2 CANPL2	Calpain-2 catalytic subunit (EC 3.4.22.53) (Calcium-activated neutral proteinase 2) (CANP 2) (Calpain M-type) (Calpain large polypeptide L2) (Calpain-2 large subunit) (Millimolar-calpain) (M-calpain)	-0.468714	0.0752872
CALU_HUMAN	6	CALU	Calumenin (Crocalbin) (IEF SSP 9302)	-0.469614	0.109094
AHNK_HUMAN	132	AHNAK PM227	Neuroblast differentiation-associated protein AHNAK (Desmoyokin)	-0.470389	0.323191
ACADM_HUMAN	4	ACADM	Medium-chain specific acyl-CoA dehydrogenase, mitochondrial (MCAD) (EC 1.3.8.7)	-0.471444	0.282666
LRC47_HUMAN	6	LRRC47 KIAA1185	Leucine-rich repeat-containing protein 47	-0.475281	0.0673616
ASSY_HUMAN	3	ASS1 ASS	Argininosuccinate synthase (EC 6.3.4.5) (Citrulline--aspartate ligase)	-0.47605	0.184712
S27A3_HUMAN	4	SLC27A3 ACSVL3 FATP3 PSEC0067 UNQ367/PRO703	Solute carrier family 27 member 3 (EC 6.2.1.-) (Long-chain fatty acid transport protein 3) (FATP-3) (Fatty acid transport protein 3) (Very long-chain acyl-CoA synthetase homolog 3) (VLCS-3)	-0.476538	0.13498
RTRAF_HUMAN	5	RTRAF C14orf166 CGI-99	RNA transcription, translation and transport factor protein (CLE7 homolog) (CLE) (hCLE)	-0.480918	0.0927066
AP2A1_HUMAN	3	AP2A1 ADTAA CLAPA1	AP-2 complex subunit alpha-1 (100 kDa coated vesicle protein A) (Adaptor protein complex AP-2 subunit alpha-1) (Adaptor-related protein complex 2 subunit alpha-1) (Alpha-adaptin A) (Alpha1-adaptin) (Clathrin assembly protein complex 2 alpha-A large chain) (Plasma membrane adaptor HA2/AP2 adaptin alpha A subunit)	-0.483257	0.11329
EFCB5_HUMAN	3	EFCAB5	EF-hand calcium-binding domain-containing protein 5	-0.48358	0.181368
KAP2_HUMAN	5	PRKAR2A PKR2 PRKAR2	cAMP-dependent protein kinase type II-alpha regulatory subunit	-0.491037	0.00448388
RASL1_HUMAN	3	RASAL1 RASAL	RasGAP-activating-like protein 1 (RAS protein activator like 1) (Ras GTPase-activating-like protein)	-0.493498	0.268636
TBB5_HUMAN	5	TUBB TUBB5 OK/SW-cl.56	Tubulin beta chain (Tubulin beta-5 chain)	-0.495196	0.259173
FLOT2_HUMAN	3	FLOT2 ESA1 M17S1	Flotillin-2 (Epidermal surface antigen) (ESA) (Membrane component chromosome 17 surface marker 1)	-0.496082	0.149107
DCD_HUMAN	4	DCD AIDD DSEP	Dermcidin (EC 3.4.-.-) (Preproteolysin) [Cleaved into: Survival-promoting peptide; DCD-1]	-0.496346	0.196337
CAZA2_HUMAN	6	CAPZA2	F-actin-capping protein subunit alpha-2 (CapZ alpha-2)	-0.497728	0.108953
SFXN3_HUMAN	7	SFXN3	Sideroflexin-3	-0.497826	0.0699794
CAND1_HUMAN	9	CAND1 KIAA0829 TIP120 TIP120A	Cullin-associated NEDD8-dissociated protein 1 (Cullin-associated and neddylation-dissociated protein 1) (TBP-interacting protein of 120 kDa A) (TBP-interacting protein 120A) (p120 CAND1)	-0.500167	0.0148019
PRS4_HUMAN	5	PSMC1	26S proteasome regulatory subunit 4 (P26s4) (26S proteasome AAA-ATPase subunit RPT2) (Proteasome 26S subunit ATPase 1)	-0.500263	0.0642021
SYEP_HUMAN	5	EPRS GLNS PARS QARS QPRS PIG32	Bifunctional glutamate/proline--tRNA ligase (Bifunctional aminoacyl-tRNA synthetase) (Cell proliferation-inducing gene 32 protein) (Glutamatyl-prolyl-tRNA synthetase) [Includes: Glutamate--tRNA ligase (EC 6.1.1.17) (Glutamyl-tRNA synthetase) (GluRS); Proline--tRNA ligase (EC 6.1.1.15) (Prolyl-tRNA synthetase)]	-0.503244	0.116451
ADH1B_HUMAN	6	ADH1B ADH2	Alcohol dehydrogenase 1B (EC 1.1.1.1) (Alcohol dehydrogenase subunit beta)	-0.505721	0.184455
PRS6B_HUMAN	3	PSMC4 MIP224 TBP7	26S proteasome regulatory subunit 6B (26S proteasome AAA-ATPase subunit RPT3) (MB67-interacting protein) (MIP224) (Proteasome 26S subunit ATPase 4) (Tat-binding protein 7) (TBP-7)	-0.513464	0.0879765
SEPT9_HUMAN	6	SEPT9 KIAA0991 MSF	Septin-9 (MLL septin-like fusion protein MSF-A) (MLL septin-like fusion protein) (Ovarian/Breast septin) (Ov/Br septin) (Septin D1)	-0.514306	0.0279787
GSTP1_HUMAN	11	GSTP1 FAEES3 GST3	Glutathione S-transferase P (EC 2.5.1.18) (GST class-pi) (GSTP1-1)	-0.515366	0.401977
PSB2_HUMAN	4	PSMB2	Proteasome subunit beta type-2 (EC 3.4.25.1) (Macropain subunit C7-I) (Multicatalytic endopeptidase complex subunit C7-I) (Proteasome component C7-I)	-0.515427	0.100437
PIMT_HUMAN	3	PCMT1	Protein-L-isoaspartate(D-aspartate) O-methyltransferase (PIMT) (EC 2.1.1.77) (L-isoaspartyl protein carboxyl methyltransferase) (Protein L-isoaspartyl/D-aspartyl methyltransferase) (Protein-beta-aspartate methyltransferase)	-0.517219	0.157468
CROCC_HUMAN	5	CROCC KIAA0445	Rootletin (Ciliary rootlet coiled-coil protein)	-0.517663	0.111846
PRPS1_HUMAN	4	PRPS1	Ribose-phosphate pyrophosphokinase 1 (EC 2.7.6.1) (PPRibP) (Phosphoribosyl pyrophosphate synthase I) (PRS-I)	-0.518312	0.0405072
TBA1A_HUMAN	20	TUBA1A TUBA3	Tubulin alpha-1A chain (Alpha-tubulin 3) (Tubulin B-alpha-1) (Tubulin alpha-3 chain) [Cleaved into: Detyrosinated tubulin alpha-1A chain]	-0.519752	0.642138
PPIA_HUMAN	10	PPIA CYPA	Peptidyl-prolyl cis-trans isomerase A (PPIase A) (EC 5.2.1.8) (Cyclophilin A) (Cyclosporin A-binding protein) (Rotamase A) [Cleaved into: Peptidyl-prolyl cis-trans isomerase A, N-terminally processed]	-0.521536	0.0734234
RAB5B_HUMAN	5	RAB5B	Ras-related protein Rab-5B	-0.522589	0.0250501
FIBA_HUMAN	23	FGA	Fibrinogen alpha chain [Cleaved into: Fibrinopeptide A; Fibrinogen alpha chain]	-0.524425	0.0287418
K1C13_HUMAN	8	KRT13	Keratin, type I cytoskeletal 13 (Cytokeratin-13) (CK-13) (Keratin-13) (K13)	-0.527459	0.256264
PDLI1_HUMAN	6	PDLIM1 CLIM1 CLP36	PDZ and LIM domain protein 1 (C-terminal LIM domain protein 1) (Elfin) (LIM domain protein CLP-36)	-0.528204	0.0466143
PGM2_HUMAN	4	PGM2 MSTP006	Phosphoglucomutase-2 (PGM 2) (EC 5.4.2.2) (Glucose phosphomutase 2) (Phosphodeoxyribomutase) (Phosphopentomutase) (EC 5.4.2.7)	-0.52949	0.119459
RAB2A_HUMAN	3	RAB2A RAB2	Ras-related protein Rab-2A	-0.529615	0.184712
TPIS_HUMAN	12	TPI1 TPI	Triosephosphate isomerase (TIM) (EC 5.3.1.1) (Methylglyoxal synthase) (EC 4.2.3.3) (Triose-phosphate isomerase)	-0.533744	0.158458
PDC6I_HUMAN	16	PDCD6IP AIP1 ALIX KIAA1375	Programmed cell death 6-interacting protein (PDCD6-interacting protein) (ALG-2-interacting protein 1) (ALG-2-interacting protein X) (Hp95)	-0.536075	0.00133455
PNCB_HUMAN	3	NAPRT FHIP NAPRT1	Nicotinate phosphoribosyltransferase (NAPRTase) (EC 6.3.4.21) (FHA-HIT-interacting protein) (Nicotinate phosphoribosyltransferase domain-containing protein 1)	-0.536373	0.0562292
TCPG_HUMAN	8	CCT3 CCTG TRIC5	T-complex protein 1 subunit gamma (TCP-1-gamma) (CCT-gamma) (hTRiC5)	-0.537686	0.0250765
CALR_HUMAN	7	CALR CRTC	Calreticulin (CRP55) (Calregulin) (Endoplasmic reticulum resident protein 60) (ERp60) (HACBP) (grp60)	-0.539002	0.0910809
GT251_HUMAN	5	COLGALT1 GLT25D1 PSEC0241	Procollagen galactosyltransferase 1 (EC 2.4.1.50) (Collagen beta(1-O)galactosyltransferase 1) (ColGalT 1) (Glycosyltransferase 25 family member 1) (Hydroxylysine galactosyltransferase 1)	-0.539281	0.167906
MIC60_HUMAN	13	IMMT HMP MIC60 MINOS2 PIG4 PIG52	MICOS complex subunit MIC60 (Cell proliferation-inducing gene 4/52 protein) (Mitochondrial inner membrane protein) (Mitofilin) (p87/89)	-0.542112	0.0699794
IQGA1_HUMAN	44	IQGAP1 KIAA0051	Ras GTPase-activating-like protein IQGAP1 (p195)	-0.544641	0.0460261
CALL5_HUMAN	3	CALML5 CLSP	Calmodulin-like protein 5 (Calmodulin-like skin protein)	-0.544997	0.28931
HBG1_HUMAN	6	HBG1 PRO2979	Hemoglobin subunit gamma-1 (Gamma-1-globin) (Hb F Agamma) (Hemoglobin gamma-1 chain) (Hemoglobin gamma-A chain)	-0.545407	0.191397
RTCB_HUMAN	4	RTCB C22orf28 HSPC117	tRNA-splicing ligase RtcB homolog (EC 6.5.1.3)	-0.548897	0.0948573
GDIR1_HUMAN	4	ARHGDIA GDIA1	Rho GDP-dissociation inhibitor 1 (Rho GDI 1) (Rho-GDI alpha)	-0.550748	0.152204
RL14_HUMAN	3	RPL14	60S ribosomal protein L14 (CAG-ISL 7) (Large ribosomal subunit protein eL14)	-0.552219	0.192547
VMA5A_HUMAN	3	VWA5A BCSC1 LOH11CR2A	von Willebrand factor A domain-containing protein 5A (Breast cancer suppressor candidate 1) (BCSC-1) (Loss of heterozygosity 11 chromosomal region 2 gene A protein)	-0.554888	0.132405
H0Y9H1_HUMAN	3	CANX	Calnexin (Fragment)	-0.55564	0.175425
1433E_HUMAN	11	YWHAE	14-3-3 protein epsilon (14-3-3E)	-0.55826	0.480984
ADDG_HUMAN	5	ADD3 ADDL	Gamma-adducin (Adducin-like protein 70)	-0.559706	0.0436751
RCN1_HUMAN	7	RCN1 RCN	Reticulocalbin-1	-0.559717	0.0711179
AL9A1_HUMAN	8	ALDH9A1 ALDH4 ALDH7 ALDH9	4-trimethylaminobutyraldehyde dehydrogenase (TMABADH) (EC 1.2.1.47) (Aldehyde dehydrogenase E3 isozyme) (Aldehyde dehydrogenase family 9 member A1) (EC 1.2.1.3) (Gamma-aminobutyraldehyde dehydrogenase) (EC 1.2.1.19) (R-aminobutyraldehyde dehydrogenase) [Cleaved into: 4-trimethylaminobutyraldehyde dehydrogenase, N-terminally processed]	-0.561422	0.0109196
ECHA_HUMAN	12	HADHA HADH	Trifunctional enzyme subunit alpha, mitochondrial (78 kDa gastrin-binding protein) (TP-alpha) [Includes: Long-chain enoyl-CoA hydratase (EC 4.2.1.17); Long chain 3-hydroxyacyl-CoA dehydrogenase (EC 1.1.1.211)]	-0.561612	0.00905868
ODP2_HUMAN	3	DLAT DLTA	Dihydrolipoyllysine-residue acetyltransferase component of pyruvate dehydrogenase complex, mitochondrial (EC 2.3.1.12) (70 kDa mitochondrial autoantigen of primary biliary cirrhosis) (PBC) (Dihydrolipoamide acetyltransferase component of pyruvate dehydrogenase complex) (M2 antigen complex 70 kDa subunit) (Pyruvate dehydrogenase complex component E2) (PDC-E2) (PDCE2)	-0.562631	0.1206
CASPE_HUMAN	7	CASP14	Caspase-14 (CASP-14) (EC 3.4.22.-) [Cleaved into: Caspase-14 subunit p17, mature form; Caspase-14 subunit p10, mature form; Caspase-14 subunit p20, intermediate form; Caspase-14 subunit p8, intermediate form]	-0.563108	0.0831534
SYFB_HUMAN	3	FARSB FARSLB FRSB HSPC173	Phenylalanine--tRNA ligase beta subunit (EC 6.1.1.20) (Phenylalanyl-tRNA synthetase beta subunit) (PheRS)	-0.564903	0.111396
HS105_HUMAN	3	HSPH1 HSP105 HSP110 KIAA0201	Heat shock protein 105 kDa (Antigen NY-CO-25) (Heat shock 110 kDa protein)	-0.565086	0.146966
IGHA2_HUMAN	3	IGHA2	Immunoglobulin heavy constant alpha 2 (Ig alpha-2 chain C region) (Ig alpha-2 chain C region BUT) (Ig alpha-2 chain C region LAN)	-0.565723	0.0363818
RL9_HUMAN	5	RPL9 OK/SW-cl.103; RPL9P7; RPL9P8; RPL9P9	60S ribosomal protein L9 (Large ribosomal subunit protein uL6)	-0.56771	0.128199
SUSD2_HUMAN	7	SUSD2	Sushi domain-containing protein 2	-0.569383	0.0971039
CPNE1_HUMAN	6	CPNE1 CPN1	Copine-1 (Chromobindin 17) (Copine I)	-0.570665	0.0461721
TERA_HUMAN	21	VCP	Transitional endoplasmic reticulum ATPase (TER ATPase) (EC 3.6.4.6) (15S Mg(2+)-ATPase p97 subunit) (Valosin-containing protein) (VCP)	-0.571418	0.00189442
DBNL_HUMAN	5	DBNL CMAP SH3P7 PP5423	Drebrin-like protein (Cervical SH3P7) (Cervical mucin-associated protein) (Drebrin-F) (HPK1-interacting protein of 55 kDa) (HIP-55) (SH3 domain-containing protein 7)	-0.573847	0.0233599
DYHC1_HUMAN	55	DYNC1H1 DHC1 DNCH1 DNCL DNECL DYHC KIAA0325	Cytoplasmic dynein 1 heavy chain 1 (Cytoplasmic dynein heavy chain 1) (Dynein heavy chain, cytosolic)	-0.57454	0.0119945
DCTN2_HUMAN	8	DCTN2 DCTN50	Dynactin subunit 2 (50 kDa dynein-associated polypeptide) (Dynactin complex 50 kDa subunit) (DCTN-50) (p50 dynamitin)	-0.577012	0.0667952
IF6_HUMAN	3	EIF6 EIF3A ITGB4BP OK/SW-cl.27	Eukaryotic translation initiation factor 6 (eIF-6) (B(2)GCN homolog) (B4 integrin interactor) (CAB) (p27(BBP))	-0.577652	0.055447
AL1A1_HUMAN	13	ALDH1A1 ALDC ALDH1 PUMB1	Retinal dehydrogenase 1 (RALDH 1) (RalDH1) (EC 1.2.1.-) (EC 1.2.1.36) (ALDH-E1) (ALHDII) (Aldehyde dehydrogenase family 1 member A1) (Aldehyde dehydrogenase, cytosolic)	-0.577867	0.0244444
UBP5_HUMAN	3	USP5 ISOT	Ubiquitin carboxyl-terminal hydrolase 5 (EC 3.4.19.12) (Deubiquitinating enzyme 5) (Isopeptidase T) (Ubiquitin thioesterase 5) (Ubiquitin-specific-processing protease 5)	-0.581503	0.141641
ASPH_HUMAN	3	ASPH BAH	Aspartyl/asparaginyl beta-hydroxylase (EC 1.14.11.16) (Aspartate beta-hydroxylase) (ASP beta-hydroxylase) (Peptide-aspartate beta-dioxygenase)	-0.585644	0.160721
THTM_HUMAN	4	MPST TST2	3-mercaptopyruvate sulfurtransferase (MST) (EC 2.8.1.2)	-0.587619	0.0476165
A16A1_HUMAN	3	ALDH16A1	Aldehyde dehydrogenase family 16 member A1	-0.590971	0.112807
TCPQ_HUMAN	9	CCT8 C21orf112 CCTQ KIAA0002	T-complex protein 1 subunit theta (TCP-1-theta) (CCT-theta) (Chaperonin containing T-complex polypeptide 1 subunit 8) (Renal carcinoma antigen NY-REN-15)	-0.591481	0.00466388
ABHEB_HUMAN	3	ABHD14B CIB	Protein ABHD14B (EC 3.-.-.-) (Alpha/beta hydrolase domain-containing protein 14B) (Abhydrolase domain-containing protein 14B) (CCG1-interacting factor B)	-0.593607	0.0638876
TCPD_HUMAN	5	CCT4 CCTD SRB	T-complex protein 1 subunit delta (TCP-1-delta) (CCT-delta) (Stimulator of TAR RNA-binding)	-0.593696	0.191804
DDX3X_HUMAN	8	DDX3X DBX DDX3	ATP-dependent RNA helicase DDX3X (EC 3.6.4.13) (DEAD box protein 3, X-chromosomal) (DEAD box, X isoform) (Helicase-like protein 2) (HLP2)	-0.594276	0.00547229
SYNC_HUMAN	3	NARS	Asparagine--tRNA ligase, cytoplasmic (EC 6.1.1.22) (Asparaginyl-tRNA synthetase) (AsnRS)	-0.598348	0.213486
PGK1_HUMAN	15	PGK1 PGKA MIG10 OK/SW-cl.110	Phosphoglycerate kinase 1 (EC 2.7.2.3) (Cell migration-inducing gene 10 protein) (Primer recognition protein 2) (PRP 2)	-0.600531	0.0115993
TCPH_HUMAN	7	CCT7 CCTH NIP7-1	T-complex protein 1 subunit eta (TCP-1-eta) (CCT-eta) (HIV-1 Nef-interacting protein) [Cleaved into: T-complex protein 1 subunit eta, N-terminally processed]	-0.603027	0.0176025
CALL3_HUMAN	3	CALML3	Calmodulin-like protein 3 (CaM-like protein) (CLP) (Calmodulin-related protein NB-1)	-0.603331	0.0332805
CDC37_HUMAN	4	CDC37 CDC37A	Hsp90 co-chaperone Cdc37 (Hsp90 chaperone protein kinase-targeting subunit) (p50Cdc37) [Cleaved into: Hsp90 co-chaperone Cdc37, N-terminally processed]	-0.60651	0.0410974
PSD11_HUMAN	6	PSMD11	26S proteasome non-ATPase regulatory subunit 11 (26S proteasome regulatory subunit RPN6) (26S proteasome regulatory subunit S9) (26S proteasome regulatory subunit p44.5)	-0.606591	0.000866496
K2C1_HUMAN	60	KRT1 KRTA	Keratin, type II cytoskeletal 1 (67 kDa cytokeratin) (Cytokeratin-1) (CK-1) (Hair alpha protein) (Keratin-1) (K1) (Type-II keratin Kb1)	-0.606648	0.00882008
LDHB_HUMAN	10	LDHB	L-lactate dehydrogenase B chain (LDH-B) (EC 1.1.1.27) (LDH heart subunit) (LDH-H) (Renal carcinoma antigen NY-REN-46)	-0.608365	0.011014
AL7A1_HUMAN	7	ALDH7A1 ATQ1	Alpha-aminoadipic semialdehyde dehydrogenase (Alpha-AASA dehydrogenase) (EC 1.2.1.31) (Aldehyde dehydrogenase family 7 member A1) (EC 1.2.1.3) (Antiquitin-1) (Betaine aldehyde dehydrogenase) (EC 1.2.1.8) (Delta1-piperideine-6-carboxylate dehydrogenase) (P6c dehydrogenase)	-0.608544	0.0201534
PSB1_HUMAN	7	PSMB1 PSC5	Proteasome subunit beta type-1 (EC 3.4.25.1) (Macropain subunit C5) (Multicatalytic endopeptidase complex subunit C5) (Proteasome component C5) (Proteasome gamma chain)	-0.608605	0.0181499
RAB14_HUMAN	6	RAB14	Ras-related protein Rab-14	-0.60909	0.0287509
V5YQL4_HUMAN	3			-0.611388	0.0305842
MAGT1_HUMAN	3	MAGT1 IAG2 PSEC0084 UNQ628/PRO1244	Magnesium transporter protein 1 (MagT1) (Dolichyl-diphosphooligosaccharide--protein glycosyltransferase subunit MAGT1) (Oligosaccharyl transferase subunit MAGT1) (Implantation-associated protein) (IAP)	-0.611619	0.0579937
PRDX1_HUMAN	10	PRDX1 PAGA PAGB TDPX2	Peroxiredoxin-1 (EC 1.11.1.15) (Natural killer cell-enhancing factor A) (NKEF-A) (Proliferation-associated gene protein) (PAG) (Thioredoxin peroxidase 2) (Thioredoxin-dependent peroxide reductase 2)	-0.619402	0.00941291
Q3MIH3_HUMAN	10			-0.619476	0.0329682
SBSN_HUMAN	6	SBSN UNQ698/PRO1343	Suprabasin	-0.623848	0.0939952
HCDH_HUMAN	5	HADH HAD HADHSC SCHAD	Hydroxyacyl-coenzyme A dehydrogenase, mitochondrial (HCDH) (EC 1.1.1.35) (Medium and short-chain L-3-hydroxyacyl-coenzyme A dehydrogenase) (Short-chain 3-hydroxyacyl-CoA dehydrogenase)	-0.624583	0.030708
PRAF3_HUMAN	4	ARL6IP5 DERP11 JWA PRA2 PRAF3 HSPC127	PRA1 family protein 3 (ADP-ribosylation factor-like protein 6-interacting protein 5) (ARL-6-interacting protein 5) (Aip-5) (Cytoskeleton-related vitamin A-responsive protein) (Dermal papilla-derived protein 11) (GTRAP3-18) (Glutamate transporter EAAC1-interacting protein) (JM5) (Prenylated Rab acceptor protein 2) (Protein JWa) (Putative MAPK-activating protein PM27)	-0.625754	0.0752995
PSA4_HUMAN	6	PSMA4 HC9 PSC9	Proteasome subunit alpha type-4 (EC 3.4.25.1) (Macropain subunit C9) (Multicatalytic endopeptidase complex subunit C9) (Proteasome component C9) (Proteasome subunit L)	-0.629694	0.0129759
PSB4_HUMAN	5	PSMB4 PROS26	Proteasome subunit beta type-4 (EC 3.4.25.1) (26 kDa prosomal protein) (HsBPROS26) (PROS-26) (Macropain beta chain) (Multicatalytic endopeptidase complex beta chain) (Proteasome beta chain) (Proteasome chain 3) (HsN3)	-0.632151	0.0135727
SDHA_HUMAN	5	SDHA SDH2 SDHF	Succinate dehydrogenase [ubiquinone] flavoprotein subunit, mitochondrial (EC 1.3.5.1) (Flavoprotein subunit of complex II) (Fp)	-0.633291	0.00987622
PRS8_HUMAN	3	PSMC5 SUG1	26S proteasome regulatory subunit 8 (26S proteasome AAA-ATPase subunit RPT6) (Proteasome 26S subunit ATPase 5) (Proteasome subunit p45) (Thyroid hormone receptor-interacting protein 1) (TRIP1) (p45/SUG)	-0.636705	0.034034
RO60_HUMAN	3	RO60 SSA2 TROVE2	60 kDa SS-A/Ro ribonucleoprotein (60 kDa Ro protein) (60 kDa ribonucleoprotein Ro) (Ro60) (RoRNP) (Ro 60 kDa autoantigen) (Ro60 autoantigen) (Sjoegren syndrome antigen A2) (Sjoegren syndrome type A antigen) (SS-A) (TROVE domain family member 2)	-0.636797	0.00905868
TOIP1_HUMAN	4	TOR1AIP1 LAP1	Torsin-1A-interacting protein 1 (Lamin-associated protein 1B) (LAP1B)	-0.639694	0.107778
EPIPL_HUMAN	3	EPPK1 EPIPL	Epiplakin (450 kDa epidermal antigen)	-0.641201	0.122809
HCD2_HUMAN	7	HSD17B10 ERAB HADH2 MRPP2 SCHAD SDR5C1 XH98G2	3-hydroxyacyl-CoA dehydrogenase type-2 (EC 1.1.1.35) (17-beta-hydroxysteroid dehydrogenase 10) (17-beta-HSD 10) (EC 1.1.1.51) (2-methyl-3-hydroxybutyryl-CoA dehydrogenase) (MHBD) (3-hydroxy-2-methylbutyryl-CoA dehydrogenase) (EC 1.1.1.178) (3-hydroxyacyl-CoA dehydrogenase type II) (Endoplasmic reticulum-associated amyloid beta-peptide-binding protein) (Mitochondrial ribonuclease P protein 2) (Mit…	-0.64293	0.0244444
TRXR1_HUMAN	5	TXNRD1 GRIM12 KDRF	Thioredoxin reductase 1, cytoplasmic (TR) (EC 1.8.1.9) (Gene associated with retinoic and interferon-induced mortality 12 protein) (GRIM-12) (Gene associated with retinoic and IFN-induced mortality 12 protein) (KM-102-derived reductase-like factor) (Thioredoxin reductase TR1)	-0.644824	0.0959254
AK1A1_HUMAN	6	AKR1A1 ALDR1 ALR	Aldo-keto reductase family 1 member A1 (EC 1.1.1.2) (EC 1.1.1.372) (EC 1.1.1.54) (Alcohol dehydrogenase [NADP(+)]) (Aldehyde reductase) (Glucuronate reductase) (EC 1.1.1.19) (Glucuronolactone reductase) (EC 1.1.1.20)	-0.645816	0.0175168
PTPA_HUMAN	4	PTPA PPP2R4	Serine/threonine-protein phosphatase 2A activator (EC 5.2.1.8) (PP2A, subunit B', PR53 isoform) (Phosphotyrosyl phosphatase activator) (PTPA) (Serine/threonine-protein phosphatase 2A regulatory subunit 4) (Serine/threonine-protein phosphatase 2A regulatory subunit B')	-0.648414	0.0285058
ATPB_HUMAN	23	ATP5F1B ATP5B ATPMB ATPSB	ATP synthase subunit beta, mitochondrial (EC 7.1.2.2) (ATP synthase F1 subunit beta)	-0.654645	0.389599
Q8TC04_HUMAN	3			-0.656175	0.164799
GALK1_HUMAN	3	GALK1 GALK	Galactokinase (EC 2.7.1.6) (Galactose kinase)	-0.658941	0.102305
K1C16_HUMAN	27	KRT16 KRT16A	Keratin, type I cytoskeletal 16 (Cytokeratin-16) (CK-16) (Keratin-16) (K16)	-0.660304	0.389474
LAP2B_HUMAN	3	TMPO LAP2	Lamina-associated polypeptide 2, isoforms beta/gamma (Thymopoietin, isoforms beta/gamma) (TP beta/gamma) (Thymopoietin-related peptide isoforms beta/gamma) (TPRP isoforms beta/gamma) [Cleaved into: Thymopoietin (TP) (Splenin); Thymopentin (TP5)]	-0.660371	0.113902
ATP5L_HUMAN	3	ATP5MG ATP5L	ATP synthase subunit g, mitochondrial (ATPase subunit g) (ATP synthase membrane subunit g)	-0.660444	0.0955614
FILA_HUMAN	5	FLG	Filaggrin	-0.660603	0.0358509
RAB1A_HUMAN	4	RAB1A RAB1	Ras-related protein Rab-1A (YPT1-related protein)	-0.662926	0.280667
HNRL1_HUMAN	7	HNRNPUL1 E1BAP5 HNRPUL1	Heterogeneous nuclear ribonucleoprotein U-like protein 1 (Adenovirus early region 1B-associated protein 5) (E1B-55 kDa-associated protein 5) (E1B-AP5)	-0.663941	0.0442113
SDHB_HUMAN	3	SDHB SDH SDH1	Succinate dehydrogenase [ubiquinone] iron-sulfur subunit, mitochondrial (EC 1.3.5.1) (Iron-sulfur subunit of complex II) (Ip)	-0.66441	0.026331
CAPZB_HUMAN	6	CAPZB	F-actin-capping protein subunit beta (CapZ beta)	-0.667052	0.0038199
PCBP1_HUMAN	6	PCBP1	Poly(rC)-binding protein 1 (Alpha-CP1) (Heterogeneous nuclear ribonucleoprotein E1) (hnRNP E1) (Nucleic acid-binding protein SUB2.3)	-0.667473	0.00620106
PSA6_HUMAN	7	PSMA6 PROS27	Proteasome subunit alpha type-6 (EC 3.4.25.1) (27 kDa prosomal protein) (PROS-27) (p27K) (Macropain iota chain) (Multicatalytic endopeptidase complex iota chain) (Proteasome iota chain)	-0.668633	0.0607106
41_HUMAN	4	EPB41 E41P	Protein 4.1 (P4.1) (4.1R) (Band 4.1) (EPB4.1)	-0.670014	0.058172
2AAA_HUMAN	5	PPP2R1A	Serine/threonine-protein phosphatase 2A 65 kDa regulatory subunit A alpha isoform (Medium tumor antigen-associated 61 kDa protein) (PP2A subunit A isoform PR65-alpha) (PP2A subunit A isoform R1-alpha)	-0.673852	0.011098
SF3B2_HUMAN	6	SF3B2 SAP145	Splicing factor 3B subunit 2 (Pre-mRNA-splicing factor SF3b 145 kDa subunit) (SF3b145) (Spliceosome-associated protein 145) (SAP 145)	-0.676006	0.0363147
DDAH2_HUMAN	6	DDAH2 DDAH G6A NG30	N(G),N(G)-dimethylarginine dimethylaminohydrolase 2 (DDAH-2) (Dimethylarginine dimethylaminohydrolase 2) (EC 3.5.3.18) (DDAHII) (Dimethylargininase-2) (Protein G6a) (S-phase protein)	-0.676303	0.0110042
6PGL_HUMAN	3	PGLS	6-phosphogluconolactonase (6PGL) (EC 3.1.1.31)	-0.678365	0.00323529
CDSN_HUMAN	5	CDSN	Corneodesmosin (S protein)	-0.678842	0.0385564
NONO_HUMAN	12	NONO NRB54	Non-POU domain-containing octamer-binding protein (NonO protein) (54 kDa nuclear RNA- and DNA-binding protein) (55 kDa nuclear protein) (DNA-binding p52/p100 complex, 52 kDa subunit) (NMT55) (p54(nrb)) (p54nrb)	-0.680426	0.000193068
STIM1_HUMAN	3	STIM1 GOK	Stromal interaction molecule 1	-0.682759	0.0718106
K2C80_HUMAN	4	KRT80 KB20	Keratin, type II cytoskeletal 80 (Cytokeratin-80) (CK-80) (Keratin-80) (K80) (Type-II keratin Kb20)	-0.684664	0.0119945
INF2_HUMAN	5	INF2 C14orf151 C14orf173	Inverted formin-2 (HBEBP2-binding protein C)	-0.684775	0.0306845
SYRC_HUMAN	5	RARS	Arginine--tRNA ligase, cytoplasmic (EC 6.1.1.19) (Arginyl-tRNA synthetase) (ArgRS)	-0.687219	0.0210466
S10A4_HUMAN	5	S100A4 CAPL MTS1	Protein S100-A4 (Calvasculin) (Metastasin) (Placental calcium-binding protein) (Protein Mts1) (S100 calcium-binding protein A4)	-0.691604	0.0267433
LYSC_HUMAN	4	LYZ LZM	Lysozyme C (EC 3.2.1.17) (1,4-beta-N-acetylmuramidase C)	-0.693515	0.0787435
PSMD2_HUMAN	6	PSMD2 TRAP2	26S proteasome non-ATPase regulatory subunit 2 (26S proteasome regulatory subunit RPN1) (26S proteasome regulatory subunit S2) (26S proteasome subunit p97) (Protein 55.11) (Tumor necrosis factor type 1 receptor-associated protein 2)	-0.69582	0.0270526
KINH_HUMAN	6	KIF5B KNS KNS1	Kinesin-1 heavy chain (Conventional kinesin heavy chain) (Ubiquitous kinesin heavy chain) (UKHC)	-0.696	0.00419299
SNX2_HUMAN	6	SNX2 TRG9	Sorting nexin-2 (Transformation-related gene 9 protein) (TRG-9)	-0.698648	0.00518235
Q6IPT9_HUMAN	4			-0.699118	0.126541
K1C9_HUMAN	51	KRT9	Keratin, type I cytoskeletal 9 (Cytokeratin-9) (CK-9) (Keratin-9) (K9)	-0.700821	0.0018011
THIO_HUMAN	4	TXN TRDX TRX TRX1	Thioredoxin (Trx) (ATL-derived factor) (ADF) (Surface-associated sulphydryl protein) (SASP)	-0.700951	0.0361073
PSMD1_HUMAN	6	PSMD1	26S proteasome non-ATPase regulatory subunit 1 (26S proteasome regulatory subunit RPN2) (26S proteasome regulatory subunit S1) (26S proteasome subunit p112)	-0.701979	0.0114589
RL38_HUMAN	3	RPL38	60S ribosomal protein L38 (Large ribosomal subunit protein eL38)	-0.70245	0.0481977
SARNP_HUMAN	4	SARNP HCC1 HSPC316	SAP domain-containing ribonucleoprotein (Cytokine-induced protein of 29 kDa) (Nuclear protein Hcc-1) (Proliferation-associated cytokine-inducible protein CIP29)	-0.702675	0.0181499
ACTB_HUMAN	10	ACTB	Actin, cytoplasmic 1 (Beta-actin) [Cleaved into: Actin, cytoplasmic 1, N-terminally processed]	-0.714064	1.98658e-07
STT3B_HUMAN	6	STT3B SIMP	Dolichyl-diphosphooligosaccharide--protein glycosyltransferase subunit STT3B (Oligosaccharyl transferase subunit STT3B) (STT3-B) (EC 2.4.99.18) (Source of immunodominant MHC-associated peptides homolog)	-0.714828	0.0172084
ANM5_HUMAN	3	PRMT5 HRMT1L5 IBP72 JBP1 SKB1	Protein arginine N-methyltransferase 5 (EC 2.1.1.320) (72 kDa ICln-binding protein) (Histone-arginine N-methyltransferase PRMT5) (Jak-binding protein 1) (Shk1 kinase-binding protein 1 homolog) (SKB1 homolog) (SKB1Hs) [Cleaved into: Protein arginine N-methyltransferase 5, N-terminally processed]	-0.715107	0.0562292
NDUS1_HUMAN	7	NDUFS1	NADH-ubiquinone oxidoreductase 75 kDa subunit, mitochondrial (EC 1.6.99.3) (EC 7.1.1.2) (Complex I-75kD) (CI-75kD)	-0.715914	0.00470258
DMBT1_HUMAN	3	DMBT1 GP340	Deleted in malignant brain tumors 1 protein (Glycoprotein 340) (Gp-340) (Hensin) (Salivary agglutinin) (SAG) (Surfactant pulmonary-associated D-binding protein)	-0.716154	0.149107
ACAD9_HUMAN	3	ACAD9	Acyl-CoA dehydrogenase family member 9, mitochondrial (ACAD-9) (EC 1.3.99.-)	-0.717332	0.034582
SCRB2_HUMAN	3	SCARB2 CD36L2 LIMP2 LIMPII	Lysosome membrane protein 2 (85 kDa lysosomal membrane sialoglycoprotein) (LGP85) (CD36 antigen-like 2) (Lysosome membrane protein II) (LIMP II) (Scavenger receptor class B member 2) (CD antigen CD36)	-0.721692	0.0912768
SYVC_HUMAN	9	VARS G7A VARS2	Valine--tRNA ligase (EC 6.1.1.9) (Protein G7a) (Valyl-tRNA synthetase) (ValRS)	-0.723013	0.000500385
ERF1_HUMAN	3	ETF1 ERF1 RF1 SUP45L1	Eukaryotic peptide chain release factor subunit 1 (Eukaryotic release factor 1) (eRF1) (Protein Cl1) (TB3-1)	-0.726542	0.0536418
RL13A_HUMAN	3	RPL13A	60S ribosomal protein L13a (23 kDa highly basic protein) (Large ribosomal subunit protein uL13)	-0.731163	0.0589088
A0A024RBS2_HUMAN	5			-0.731545	0.00996707
IDH3A_HUMAN	3	IDH3A	Isocitrate dehydrogenase [NAD] subunit alpha, mitochondrial (EC 1.1.1.41) (Isocitric dehydrogenase subunit alpha) (NAD(+)-specific ICDH subunit alpha)	-0.732327	0.000101031
DDB1_HUMAN	6	DDB1 XAP1	DNA damage-binding protein 1 (DDB p127 subunit) (DNA damage-binding protein a) (DDBa) (Damage-specific DNA-binding protein 1) (HBV X-associated protein 1) (XAP-1) (UV-damaged DNA-binding factor) (UV-damaged DNA-binding protein 1) (UV-DDB 1) (XPE-binding factor) (XPE-BF) (Xeroderma pigmentosum group E-complementing protein) (XPCe)	-0.738698	0.00914791
NEBL_HUMAN	3	NEBL LNEBL	Nebulette (Actin-binding Z-disk protein)	-0.738808	0.0252304
SPB6_HUMAN	8	SERPINB6 PI6 PTI	Serpin B6 (Cytoplasmic antiproteinase) (CAP) (Peptidase inhibitor 6) (PI-6) (Placental thrombin inhibitor)	-0.740711	0.0020105
PCYOX_HUMAN	11	PCYOX1 KIAA0908 PCL1 UNQ597/PRO1183	Prenylcysteine oxidase 1 (EC 1.8.3.5) (Prenylcysteine lyase)	-0.742455	6.04e-06
HNRH3_HUMAN	6	HNRNPH3 HNRPH3	Heterogeneous nuclear ribonucleoprotein H3 (hnRNP H3) (Heterogeneous nuclear ribonucleoprotein 2H9) (hnRNP 2H9)	-0.744981	0.00144983
IMB1_HUMAN	8	KPNB1 NTF97	Importin subunit beta-1 (Importin-90) (Karyopherin subunit beta-1) (Nuclear factor p97) (Pore targeting complex 97 kDa subunit) (PTAC97)	-0.747823	0.00178642
ODO2_HUMAN	6	DLST DLTS	Dihydrolipoyllysine-residue succinyltransferase component of 2-oxoglutarate dehydrogenase complex, mitochondrial (EC 2.3.1.61) (2-oxoglutarate dehydrogenase complex component E2) (OGDC-E2) (Dihydrolipoamide succinyltransferase component of 2-oxoglutarate dehydrogenase complex) (E2K)	-0.747859	0.00694248
IGHA1_HUMAN	3	IGHA1	Immunoglobulin heavy constant alpha 1 (Ig alpha-1 chain C region) (Ig alpha-1 chain C region BUR) (Ig alpha-1 chain C region TRO)	-0.752981	0.0731412
IGHG1_HUMAN	3	IGHG1	Immunoglobulin heavy constant gamma 1 (Ig gamma-1 chain C region) (Ig gamma-1 chain C region EU) (Ig gamma-1 chain C region KOL) (Ig gamma-1 chain C region NIE)	-0.755226	0.570174
BLVRB_HUMAN	4	BLVRB FLR	Flavin reductase (NADPH) (FR) (EC 1.5.1.30) (Biliverdin reductase B) (BVR-B) (EC 1.3.1.24) (Biliverdin-IX beta-reductase) (Green heme-binding protein) (GHBP) (NADPH-dependent diaphorase) (NADPH-flavin reductase) (FLR)	-0.757265	0.0170936
EEA1_HUMAN	6	EEA1 ZFYVE2	Early endosome antigen 1 (Endosome-associated protein p162) (Zinc finger FYVE domain-containing protein 2)	-0.759601	0.037061
PSPC1_HUMAN	3	PSPC1 PSP1	Paraspeckle component 1 (Paraspeckle protein 1)	-0.759747	0.098577
VIGLN_HUMAN	5	HDLBP HBP VGL	Vigilin (High density lipoprotein-binding protein) (HDL-binding protein)	-0.760124	0.014689
RAB5C_HUMAN	3	RAB5C RABL	Ras-related protein Rab-5C (L1880) (RAB5L)	-0.763975	0.018486
VAT1_HUMAN	9	VAT1	Synaptic vesicle membrane protein VAT-1 homolog (EC 1.-.-.-)	-0.765678	0.00166475
CAN1_HUMAN	15	CAPN1 CANPL1 PIG30	Calpain-1 catalytic subunit (EC 3.4.22.52) (Calcium-activated neutral proteinase 1) (CANP 1) (Calpain mu-type) (Calpain-1 large subunit) (Cell proliferation-inducing gene 30 protein) (Micromolar-calpain) (muCANP)	-0.766861	0.000151574
IDH3B_HUMAN	3	IDH3B	Isocitrate dehydrogenase [NAD] subunit beta, mitochondrial (Isocitric dehydrogenase subunit beta) (NAD(+)-specific ICDH subunit beta)	-0.767115	0.0232993
UGPA_HUMAN	4	UGP2 UGP1	UTP--glucose-1-phosphate uridylyltransferase (EC 2.7.7.9) (UDP-glucose pyrophosphorylase) (UDPGP) (UGPase)	-0.771313	0.0107363
SORCN_HUMAN	6	SRI	Sorcin (22 kDa protein) (CP-22) (CP22) (V19)	-0.771526	0.00198409
LYRIC_HUMAN	5	MTDH AEG1 LYRIC	Protein LYRIC (3D3/LYRIC) (Astrocyte elevated gene-1 protein) (AEG-1) (Lysine-rich CEACAM1 co-isolated protein) (Metadherin) (Metastasis adhesion protein)	-0.772412	0.00995307
SEP11_HUMAN	7	2011-09-01	Septin-11	-0.773572	0.0014227
CTNA2_HUMAN	5	CTNNA2 CAPR	Catenin alpha-2 (Alpha N-catenin) (Alpha-catenin-related protein)	-0.775606	0.000879204
SC24C_HUMAN	3	SEC24C KIAA0079	Protein transport protein Sec24C (SEC24-related protein C)	-0.77565	0.0466104
MCCB_HUMAN	4	MCCC2 MCCB	Methylcrotonoyl-CoA carboxylase beta chain, mitochondrial (MCCase subunit beta) (EC 6.4.1.4) (3-methylcrotonyl-CoA carboxylase 2) (3-methylcrotonyl-CoA carboxylase non-biotin-containing subunit) (3-methylcrotonyl-CoA:carbon dioxide ligase subunit beta)	-0.779321	0.0682941
1433S_HUMAN	4	SFN HME1	14-3-3 protein sigma (Epithelial cell marker protein 1) (Stratifin)	-0.781362	0.0562045
ALDR_HUMAN	6	AKR1B1 ALDR1 ALR2	Aldo-keto reductase family 1 member B1 (EC 1.1.1.300) (EC 1.1.1.372) (EC 1.1.1.54) (Aldehyde reductase) (Aldose reductase) (AR) (EC 1.1.1.21)	-0.783764	0.00531321
ENOA_HUMAN	25	ENO1 ENO1L1 MBPB1 MPB1	Alpha-enolase (EC 4.2.1.11) (2-phospho-D-glycerate hydro-lyase) (C-myc promoter-binding protein) (Enolase 1) (MBP-1) (MPB-1) (Non-neural enolase) (NNE) (Phosphopyruvate hydratase) (Plasminogen-binding protein)	-0.786923	0.0664752
RLA0_HUMAN	3	RPLP0	60S acidic ribosomal protein P0 (60S ribosomal protein L10E) (Large ribosomal subunit protein uL10)	-0.787044	0.058172
ERO1A_HUMAN	5	ERO1A ERO1L UNQ434/PRO865	ERO1-like protein alpha (ERO1-L) (ERO1-L-alpha) (EC 1.8.4.-) (Endoplasmic oxidoreductin-1-like protein) (Endoplasmic reticulum oxidoreductase alpha) (Oxidoreductin-1-L-alpha)	-0.788137	0.00289998
HS90A_HUMAN	27	HSP90AA1 HSP90A HSPC1 HSPCA	Heat shock protein HSP 90-alpha (Heat shock 86 kDa) (HSP 86) (HSP86) (Lipopolysaccharide-associated protein 2) (LAP-2) (LPS-associated protein 2) (Renal carcinoma antigen NY-REN-38)	-0.788522	0.0148685
LMNB2_HUMAN	20	LMNB2 LMN2	Lamin-B2	-0.789504	0.000131837
KAD3_HUMAN	5	AK3 AK3L1 AK6 AKL3L	GTP:AMP phosphotransferase AK3, mitochondrial (EC 2.7.4.10) (Adenylate kinase 3) (AK 3) (Adenylate kinase 3 alpha-like 1)	-0.791969	0.00257599
G6PD_HUMAN	9	G6PD	Glucose-6-phosphate 1-dehydrogenase (G6PD) (EC 1.1.1.49)	-0.792453	5.34489e-05
EHD1_HUMAN	11	EHD1 PAST PAST1 CDABP0131	EH domain-containing protein 1 (PAST homolog 1) (hPAST1) (Testilin)	-0.793355	0.0101278
K2C4_HUMAN	11	KRT4 CYK4	Keratin, type II cytoskeletal 4 (Cytokeratin-4) (CK-4) (Keratin-4) (K4) (Type-II keratin Kb4)	-0.79361	0.0170933
IF5_HUMAN	3	EIF5	Eukaryotic translation initiation factor 5 (eIF-5)	-0.79816	0.0401232
SLIRP_HUMAN	4	SLIRP C14orf156 DC23 DC50 PD04872	SRA stem-loop-interacting RNA-binding protein, mitochondrial	-0.798487	0.00511082
CYTA_HUMAN	6	CSTA STF1 STFA	Cystatin-A (Cystatin-AS) (Stefin-A) [Cleaved into: Cystatin-A, N-terminally processed]	-0.801322	0.00416641
KI67_HUMAN	5	MKI67	Proliferation marker protein Ki-67 (Antigen identified by monoclonal antibody Ki-67) (Antigen KI-67) (Antigen Ki67)	-0.801738	0.055104
UFL1_HUMAN	3	UFL1 KIAA0776 MAXER NLBP RCAD	E3 UFM1-protein ligase 1 (EC 2.3.2.-) (E3 UFM1-protein transferase 1) (Multiple alpha-helix protein located at ER) (Novel LZAP-binding protein) (Regulator of C53/LZAP and DDRGK1)	-0.802801	0.0387352
VDAC2_HUMAN	7	VDAC2	Voltage-dependent anion-selective channel protein 2 (VDAC-2) (hVDAC2) (Outer mitochondrial membrane protein porin 2)	-0.803911	0.00150646
PKD1_HUMAN	3	PKD1	Polycystin-1 (PC1) (Autosomal dominant polycystic kidney disease 1 protein)	-0.803972	0.0442113
MMSA_HUMAN	5	ALDH6A1 MMSDH	Methylmalonate-semialdehyde dehydrogenase [acylating], mitochondrial (MMSDH) (Malonate-semialdehyde dehydrogenase [acylating]) (EC 1.2.1.18) (EC 1.2.1.27) (Aldehyde dehydrogenase family 6 member A1)	-0.804327	0.00200777
A0A024RDR0_HUMAN	3			-0.807608	0.0272162
RAN_HUMAN	5	RAN ARA24 OK/SW-cl.81	GTP-binding nuclear protein Ran (Androgen receptor-associated protein 24) (GTPase Ran) (Ras-like protein TC4) (Ras-related nuclear protein)	-0.81496	0.010149
RL35A_HUMAN	3	RPL35A GIG33	60S ribosomal protein L35a (Cell growth-inhibiting gene 33 protein) (Large ribosomal subunit protein eL33)	-0.815268	0.0250635
IGHM_HUMAN	10	IGHM	Immunoglobulin heavy constant mu (Ig mu chain C region) (Ig mu chain C region BOT) (Ig mu chain C region GAL) (Ig mu chain C region OU)	-0.816944	0.00367614
ESYT1_HUMAN	15	ESYT1 FAM62A KIAA0747 MBC2	Extended synaptotagmin-1 (E-Syt1) (Membrane-bound C2 domain-containing protein)	-0.820124	8.60577e-05
PRDX6_HUMAN	9	PRDX6 AOP2 KIAA0106	Peroxiredoxin-6 (EC 1.11.1.15) (1-Cys peroxiredoxin) (1-Cys PRX) (24 kDa protein) (Acidic calcium-independent phospholipase A2) (aiPLA2) (EC 3.1.1.4) (Antioxidant protein 2) (Liver 2D page spot 40) (Non-selenium glutathione peroxidase) (NSGPx) (Red blood cells page spot 12)	-0.820269	0.000854759
RU2A_HUMAN	3	SNRPA1	U2 small nuclear ribonucleoprotein A' (U2 snRNP A')	-0.82096	0.0168563
LAMB1_HUMAN	4	LAMB1	Laminin subunit beta-1 (Laminin B1 chain) (Laminin-1 subunit beta) (Laminin-10 subunit beta) (Laminin-12 subunit beta) (Laminin-2 subunit beta) (Laminin-6 subunit beta) (Laminin-8 subunit beta)	-0.825165	0.0369177
VDAC3_HUMAN	3	VDAC3	Voltage-dependent anion-selective channel protein 3 (VDAC-3) (hVDAC3) (Outer mitochondrial membrane protein porin 3)	-0.826343	0.00483902
DHB8_HUMAN	3	HSD17B8 FABGL HKE6 RING2 SDR30C1	Estradiol 17-beta-dehydrogenase 8 (EC 1.1.1.62) (17-beta-hydroxysteroid dehydrogenase 8) (17-beta-HSD 8) (3-ketoacyl-[acyl-carrier-protein] reductase alpha subunit) (KAR alpha subunit) (3-oxoacyl-[acyl-carrier-protein] reductase) (EC 1.1.1.-) (Protein Ke6) (Ke-6) (Really interesting new gene 2 protein) (Short chain dehydrogenase/reductase family 30C member 1) (Testosterone 17-beta-dehydrogenase 8…	-0.831874	0.0214553
HSP7C_HUMAN	24	HSPA8 HSC70 HSP73 HSPA10	Heat shock cognate 71 kDa protein (Heat shock 70 kDa protein 8) (Lipopolysaccharide-associated protein 1) (LAP-1) (LPS-associated protein 1)	-0.833499	0.235893
ATPA_HUMAN	26	ATP5F1A ATP5A ATP5A1 ATP5AL2 ATPM	ATP synthase subunit alpha, mitochondrial (ATP synthase F1 subunit alpha)	-0.834042	0.164799
RL11_HUMAN	3	RPL11	60S ribosomal protein L11 (CLL-associated antigen KW-12) (Large ribosomal subunit protein uL5)	-0.835066	0.036056
ODO1_HUMAN	10	OGDH	2-oxoglutarate dehydrogenase, mitochondrial (EC 1.2.4.2) (2-oxoglutarate dehydrogenase complex component E1) (OGDC-E1) (Alpha-ketoglutarate dehydrogenase)	-0.845191	4.69824e-06
PSA5_HUMAN	5	PSMA5	Proteasome subunit alpha type-5 (EC 3.4.25.1) (Macropain zeta chain) (Multicatalytic endopeptidase complex zeta chain) (Proteasome zeta chain)	-0.845622	0.00927402
HNRDL_HUMAN	4	HNRNPDL HNRPDL JKTBP	Heterogeneous nuclear ribonucleoprotein D-like (hnRNP D-like) (hnRNP DL) (AU-rich element RNA-binding factor) (JKT41-binding protein) (Protein laAUF1)	-0.84762	0.00365973
SYIM_HUMAN	4	IARS2	Isoleucine--tRNA ligase, mitochondrial (EC 6.1.1.5) (Isoleucyl-tRNA synthetase) (IleRS)	-0.848605	0.00233448
NDK3_HUMAN	4	NME3	Nucleoside diphosphate kinase 3 (NDK 3) (NDP kinase 3) (EC 2.7.4.6) (DR-nm23) (Nucleoside diphosphate kinase C) (NDPKC) (nm23-H3)	-0.85016	0.00395544
A0A1B0GVU0_HUMAN	3	ALDH7A1	Alpha-aminoadipic semialdehyde dehydrogenase (Fragment)	-0.852122	0.0531889
RS20_HUMAN	3	RPS20	40S ribosomal protein S20 (Small ribosomal subunit protein uS10)	-0.853506	0.0289079
NAGK_HUMAN	5	NAGK	N-acetyl-D-glucosamine kinase (N-acetylglucosamine kinase) (EC 2.7.1.59) (GlcNAc kinase)	-0.854408	0.000662638
K2C6B_HUMAN	6	KRT6B K6B KRTL1	Keratin, type II cytoskeletal 6B (Cytokeratin-6B) (CK-6B) (Keratin-6B) (K6B) (Type-II keratin Kb10)	-0.854496	0.10006
AP2M1_HUMAN	4	AP2M1 CLAPM1 KIAA0109	AP-2 complex subunit mu (AP-2 mu chain) (Adaptin-mu2) (Adaptor protein complex AP-2 subunit mu) (Adaptor-related protein complex 2 subunit mu) (Clathrin assembly protein complex 2 mu medium chain) (Clathrin coat assembly protein AP50) (Clathrin coat-associated protein AP50) (HA2 50 kDa subunit) (Plasma membrane adaptor AP-2 50 kDa protein)	-0.854754	0.00318076
PSA1_HUMAN	6	PSMA1 HC2 NU PROS30 PSC2	Proteasome subunit alpha type-1 (EC 3.4.25.1) (30 kDa prosomal protein) (PROS-30) (Macropain subunit C2) (Multicatalytic endopeptidase complex subunit C2) (Proteasome component C2) (Proteasome nu chain)	-0.855072	0.0119506
LANC1_HUMAN	3	LANCL1 GPR69A	Glutathione S-transferase LANCL1 (EC 2.5.1.18) (40 kDa erythrocyte membrane protein) (p40) (LanC-like protein 1)	-0.858456	0.0354318
SYIC_HUMAN	3	IARS	Isoleucine--tRNA ligase, cytoplasmic (EC 6.1.1.5) (Isoleucyl-tRNA synthetase) (IRS) (IleRS)	-0.860662	0.015023
STAT3_HUMAN	4	STAT3 APRF	Signal transducer and activator of transcription 3 (Acute-phase response factor)	-0.8629	0.00719649
HNRH1_HUMAN	4	HNRNPH1 HNRPH HNRPH1	Heterogeneous nuclear ribonucleoprotein H (hnRNP H) [Cleaved into: Heterogeneous nuclear ribonucleoprotein H, N-terminally processed]	-0.863326	0.00244409
AP2B1_HUMAN	8	AP2B1 ADTB2 CLAPB1	AP-2 complex subunit beta (AP105B) (Adaptor protein complex AP-2 subunit beta) (Adaptor-related protein complex 2 subunit beta) (Beta-2-adaptin) (Beta-adaptin) (Clathrin assembly protein complex 2 beta large chain) (Plasma membrane adaptor HA2/AP2 adaptin beta subunit)	-0.864149	0.00510969
APOB_HUMAN	31	APOB	Apolipoprotein B-100 (Apo B-100) [Cleaved into: Apolipoprotein B-48 (Apo B-48)]	-0.868873	3.72035e-09
EIF3B_HUMAN	7	EIF3B EIF3S9	Eukaryotic translation initiation factor 3 subunit B (eIF3b) (Eukaryotic translation initiation factor 3 subunit 9) (Prt1 homolog) (hPrt1) (eIF-3-eta) (eIF3 p110) (eIF3 p116)	-0.874681	0.000264617
SNAA_HUMAN	3	NAPA SNAPA	Alpha-soluble NSF attachment protein (SNAP-alpha) (N-ethylmaleimide-sensitive factor attachment protein alpha)	-0.875212	0.00805187
HIBCH_HUMAN	4	HIBCH	3-hydroxyisobutyryl-CoA hydrolase, mitochondrial (EC 3.1.2.4) (3-hydroxyisobutyryl-coenzyme A hydrolase) (HIB-CoA hydrolase) (HIBYL-CoA-H)	-0.875242	0.00471522
K22O_HUMAN	4	KRT76 KRT2B KRT2P	Keratin, type II cytoskeletal 2 oral (Cytokeratin-2P) (CK-2P) (K2P) (Keratin-76) (K76) (Type-II keratin Kb9)	-0.875461	0.00195615
TRAP1_HUMAN	3	TRAP1 HSP75	Heat shock protein 75 kDa, mitochondrial (HSP 75) (TNFR-associated protein 1) (Tumor necrosis factor type 1 receptor-associated protein) (TRAP-1)	-0.878613	0.0231054
NP1L4_HUMAN	4	NAP1L4 NAP2	Nucleosome assembly protein 1-like 4 (Nucleosome assembly protein 2) (NAP-2)	-0.880003	0.0064489
EIF3E_HUMAN	5	EIF3E EIF3S6 INT6	Eukaryotic translation initiation factor 3 subunit E (eIF3e) (Eukaryotic translation initiation factor 3 subunit 6) (Viral integration site protein INT-6 homolog) (eIF-3 p48)	-0.881843	0.00133636
GDIB_HUMAN	10	GDI2 RABGDIB	Rab GDP dissociation inhibitor beta (Rab GDI beta) (Guanosine diphosphate dissociation inhibitor 2) (GDI-2)	-0.885331	0.000322744
K2C6C_HUMAN	34	KRT6C KRT6E	Keratin, type II cytoskeletal 6C (Cytokeratin-6C) (CK-6C) (Cytokeratin-6E) (CK-6E) (Keratin K6h) (Keratin-6C) (K6C) (Type-II keratin Kb12)	-0.885489	0.323191
E41L2_HUMAN	9	EPB41L2	Band 4.1-like protein 2 (Generally expressed protein 4.1) (4.1G)	-0.889167	5.56588e-05
USO1_HUMAN	5	USO1 VDP	General vesicular transport factor p115 (Protein USO1 homolog) (Transcytosis-associated protein) (TAP) (Vesicle-docking protein)	-0.889774	0.00092603
ACON_HUMAN	18	ACO2	Aconitate hydratase, mitochondrial (Aconitase) (EC 4.2.1.3) (Citrate hydro-lyase)	-0.894234	2.75946e-06
UGGG1_HUMAN	6	UGGT1 GT UGCGL1 UGGT UGT1 UGTR	UDP-glucose:glycoprotein glucosyltransferase 1 (UGT1) (hUGT1) (EC 2.4.1.-) (UDP--Glc:glycoprotein glucosyltransferase) (UDP-glucose ceramide glucosyltransferase-like 1)	-0.897247	0.00537708
MTCH2_HUMAN	3	MTCH2 MIMP HSPC032	Mitochondrial carrier homolog 2 (Met-induced mitochondrial protein)	-0.905893	0.0478531
TCPZ_HUMAN	7	CCT6A CCT6 CCTZ	T-complex protein 1 subunit zeta (TCP-1-zeta) (Acute morphine dependence-related protein 2) (CCT-zeta-1) (HTR3) (Tcp20)	-0.907674	3.79393e-05
FUMH_HUMAN	6	FH	Fumarate hydratase, mitochondrial (Fumarase) (HsFH) (EC 4.2.1.2)	-0.909394	0.000379083
PDLI2_HUMAN	4	PDLIM2 PP6345	PDZ and LIM domain protein 2 (PDZ-LIM protein mystique)	-0.910019	0.00120614
DSC3_HUMAN	5	DSC3 CDHF3 DSC4	Desmocollin-3 (Cadherin family member 3) (Desmocollin-4) (HT-CP)	-0.913888	0.0132674
ARPC2_HUMAN	12	ARPC2 ARC34 PRO2446	Actin-related protein 2/3 complex subunit 2 (Arp2/3 complex 34 kDa subunit) (p34-ARC)	-0.915939	1.85346e-05
QCR2_HUMAN	8	UQCRC2	Cytochrome b-c1 complex subunit 2, mitochondrial (Complex III subunit 2) (Core protein II) (Ubiquinol-cytochrome-c reductase complex core protein 2)	-0.915958	0.000390437
EIF3A_HUMAN	7	EIF3A EIF3S10 KIAA0139	Eukaryotic translation initiation factor 3 subunit A (eIF3a) (Eukaryotic translation initiation factor 3 subunit 10) (eIF-3-theta) (eIF3 p167) (eIF3 p180) (eIF3 p185)	-0.916611	0.00083353
K2C6A_HUMAN	4	KRT6A K6A KRT6D	Keratin, type II cytoskeletal 6A (Cytokeratin-6A) (CK-6A) (Cytokeratin-6D) (CK-6D) (Keratin-6A) (K6A) (Type-II keratin Kb6) (allergen Hom s 5)	-0.919969	0.000280692
K2C5_HUMAN	34	KRT5	Keratin, type II cytoskeletal 5 (58 kDa cytokeratin) (Cytokeratin-5) (CK-5) (Keratin-5) (K5) (Type-II keratin Kb5)	-0.921125	0.306168
PSME2_HUMAN	4	PSME2	Proteasome activator complex subunit 2 (11S regulator complex subunit beta) (REG-beta) (Activator of multicatalytic protease subunit 2) (Proteasome activator 28 subunit beta) (PA28b) (PA28beta)	-0.922479	0.0153655
RAB21_HUMAN	3	RAB21 KIAA0118	Ras-related protein Rab-21	-0.926367	0.0334975
IF2G_HUMAN	4	EIF2S3 EIF2G	Eukaryotic translation initiation factor 2 subunit 3 (Eukaryotic translation initiation factor 2 subunit gamma X) (eIF-2-gamma X) (eIF-2gX)	-0.928988	0.00270289
ATP5H_HUMAN	4	ATP5PD ATP5H My032	ATP synthase subunit d, mitochondrial (ATPase subunit d) (ATP synthase peripheral stalk subunit d)	-0.930113	0.00547229
STMN1_HUMAN	3	STMN1 C1orf215 LAP18 OP18	Stathmin (Leukemia-associated phosphoprotein p18) (Metablastin) (Oncoprotein 18) (Op18) (Phosphoprotein p19) (pp19) (Prosolin) (Protein Pr22) (pp17)	-0.933896	0.0167163
ADH1A_HUMAN	9	ADH1A ADH1	Alcohol dehydrogenase 1A (EC 1.1.1.1) (Alcohol dehydrogenase subunit alpha)	-0.934377	0.0927066
TXND5_HUMAN	9	TXNDC5 TLP46 UNQ364/PRO700	Thioredoxin domain-containing protein 5 (Endoplasmic reticulum resident protein 46) (ER protein 46) (ERp46) (Thioredoxin-like protein p46)	-0.935109	0.000324771
PLEC_HUMAN	118	PLEC PLEC1	Plectin (PCN) (PLTN) (Hemidesmosomal protein 1) (HD1) (Plectin-1)	-0.941765	0.00145854
QCR7_HUMAN	5	UQCRB UQBP	Cytochrome b-c1 complex subunit 7 (Complex III subunit 7) (Complex III subunit VII) (QP-C) (Ubiquinol-cytochrome c reductase complex 14 kDa protein)	-0.94441	0.00252425
QCR1_HUMAN	6	UQCRC1	Cytochrome b-c1 complex subunit 1, mitochondrial (Complex III subunit 1) (Core protein I) (Ubiquinol-cytochrome-c reductase complex core protein 1)	-0.946144	0.00539334
IF2A_HUMAN	5	EIF2S1 EIF2A	Eukaryotic translation initiation factor 2 subunit 1 (Eukaryotic translation initiation factor 2 subunit alpha) (eIF-2-alpha) (eIF-2A) (eIF-2alpha)	-0.946529	0.000309638
PRDX3_HUMAN	4	PRDX3 AOP1	Thioredoxin-dependent peroxide reductase, mitochondrial (EC 1.11.1.15) (Antioxidant protein 1) (AOP-1) (HBC189) (Peroxiredoxin III) (Prx-III) (Peroxiredoxin-3) (Protein MER5 homolog)	-0.947573	0.000909582
RUVB1_HUMAN	5	RUVBL1 INO80H NMP238 TIP49 TIP49A	RuvB-like 1 (EC 3.6.4.12) (49 kDa TATA box-binding protein-interacting protein) (49 kDa TBP-interacting protein) (54 kDa erythrocyte cytosolic protein) (ECP-54) (INO80 complex subunit H) (Nuclear matrix protein 238) (NMP 238) (Pontin 52) (TIP49a) (TIP60-associated protein 54-alpha) (TAP54-alpha)	-0.948694	0.000233949
DESP_HUMAN	87	DSP	Desmoplakin (DP) (250/210 kDa paraneoplastic pemphigus antigen)	-0.951196	4.73825e-06
SRSF6_HUMAN	3	SRSF6 SFRS6 SRP55	Serine/arginine-rich splicing factor 6 (Pre-mRNA-splicing factor SRP55) (Splicing factor, arginine/serine-rich 6)	-0.953315	0.00618116
ERGI1_HUMAN	4	ERGIC1 ERGIC32 KIAA1181 HT034	Endoplasmic reticulum-Golgi intermediate compartment protein 1 (ER-Golgi intermediate compartment 32 kDa protein) (ERGIC-32)	-0.958002	0.0105297
HPCL1_HUMAN	5	HPCAL1 BDR1	Hippocalcin-like protein 1 (Calcium-binding protein BDR-1) (HLP2) (Visinin-like protein 3) (VILIP-3)	-0.95814	0.00477632
DDX1_HUMAN	4	DDX1	ATP-dependent RNA helicase DDX1 (EC 3.6.4.13) (DEAD box protein 1) (DEAD box protein retinoblastoma) (DBP-RB)	-0.958587	0.00488404
HNRPR_HUMAN	6	HNRNPR HNRPR	Heterogeneous nuclear ribonucleoprotein R (hnRNP R)	-0.959757	5.08047e-05
KHDR1_HUMAN	4	KHDRBS1 SAM68	KH domain-containing, RNA-binding, signal transduction-associated protein 1 (GAP-associated tyrosine phosphoprotein p62) (Src-associated in mitosis 68 kDa protein) (Sam68) (p21 Ras GTPase-activating protein-associated p62) (p68)	-0.960657	0.00486957
MZB1_HUMAN	3	MZB1 MEDA7 PACAP HSPC190	Marginal zone B- and B1-cell-specific protein (Mesenteric estrogen-dependent adipose 7) (MEDA-7) (Plasma cell-induced resident endoplasmic reticulum protein) (Plasma cell-induced resident ER protein) (pERp1) (Proapoptotic caspase adapter protein)	-0.962294	0.00672744
TGM3_HUMAN	13	TGM3	Protein-glutamine gamma-glutamyltransferase E (EC 2.3.2.13) (Transglutaminase E) (TG(E)) (TGE) (TGase E) (Transglutaminase-3) (TGase-3) [Cleaved into: Protein-glutamine gamma-glutamyltransferase E 50 kDa catalytic chain; Protein-glutamine gamma-glutamyltransferase E 27 kDa non-catalytic chain]	-0.967888	5.6503e-05
HEXA_HUMAN	3	HEXA	Beta-hexosaminidase subunit alpha (EC 3.2.1.52) (Beta-N-acetylhexosaminidase subunit alpha) (Hexosaminidase subunit A) (N-acetyl-beta-glucosaminidase subunit alpha)	-0.971213	0.00774146
DCPS_HUMAN	3	DCPS DCS1 HINT5 HSPC015	m7GpppX diphosphatase (EC 3.6.1.59) (DCS-1) (Decapping scavenger enzyme) (Hint-related 7meGMP-directed hydrolase) (Histidine triad nucleotide-binding protein 5) (Histidine triad protein member 5) (HINT-5) (Scavenger mRNA-decapping enzyme DcpS)	-0.972422	0.0410974
COTL1_HUMAN	3	COTL1 CLP	Coactosin-like protein	-0.973115	0.00323529
EF1B_HUMAN	3	EEF1B2 EEF1B EF1B	Elongation factor 1-beta (EF-1-beta)	-0.973984	0.00153927
SRSF4_HUMAN	4	SRSF4 SFRS4 SRP75	Serine/arginine-rich splicing factor 4 (Pre-mRNA-splicing factor SRP75) (SRP001LB) (Splicing factor, arginine/serine-rich 4)	-0.974014	0.000589135
ACLY_HUMAN	6	ACLY	ATP-citrate synthase (EC 2.3.3.8) (ATP-citrate (pro-S-)-lyase) (ACL) (Citrate cleavage enzyme)	-0.976668	0.000769318
RL15_HUMAN	4	RPL15 EC45 TCBAP0781	60S ribosomal protein L15 (Large ribosomal subunit protein eL15)	-0.976837	0.000228562
IMDH1_HUMAN	4	IMPDH1 IMPD1	Inosine-5'-monophosphate dehydrogenase 1 (IMP dehydrogenase 1) (IMPD 1) (IMPDH 1) (EC 1.1.1.205) (IMPDH-I)	-0.979451	0.0215602
K1C17_HUMAN	22	KRT17	Keratin, type I cytoskeletal 17 (39.1) (Cytokeratin-17) (CK-17) (Keratin-17) (K17)	-0.980335	0.00619213
GBP1_HUMAN	4	GBP1	Guanylate-binding protein 1 (EC 3.6.5.-) (GTP-binding protein 1) (GBP-1) (HuGBP-1) (Guanine nucleotide-binding protein 1) (Interferon-induced guanylate-binding protein 1)	-0.980734	0.0142308
VATE1_HUMAN	3	ATP6V1E1 ATP6E ATP6E2	V-type proton ATPase subunit E 1 (V-ATPase subunit E 1) (V-ATPase 31 kDa subunit) (p31) (Vacuolar proton pump subunit E 1)	-0.982841	0.00970526
ROA0_HUMAN	3	HNRNPA0 HNRPA0	Heterogeneous nuclear ribonucleoprotein A0 (hnRNP A0)	-0.984209	0.00200883
HS90B_HUMAN	12	HSP90AB1 HSP90B HSPC2 HSPCB	Heat shock protein HSP 90-beta (HSP 90) (Heat shock 84 kDa) (HSP 84) (HSP84)	-0.98566	3.30221e-05
VP13C_HUMAN	3	VPS13C KIAA1421	Vacuolar protein sorting-associated protein 13C	-0.987327	0.0642805
ODPB_HUMAN	7	PDHB PHE1B	Pyruvate dehydrogenase E1 component subunit beta, mitochondrial (PDHE1-B) (EC 1.2.4.1)	-0.988372	0.00189442
K22E_HUMAN	56	KRT2 KRT2A KRT2E	Keratin, type II cytoskeletal 2 epidermal (Cytokeratin-2e) (CK-2e) (Epithelial keratin-2e) (Keratin-2 epidermis) (Keratin-2e) (K2e) (Type-II keratin Kb2)	-0.991403	0.126605
DLDH_HUMAN	7	DLD GCSL LAD PHE3	Dihydrolipoyl dehydrogenase, mitochondrial (EC 1.8.1.4) (Dihydrolipoamide dehydrogenase) (Glycine cleavage system L protein)	-0.991559	0.000877847
K2C3_HUMAN	4	KRT3	Keratin, type II cytoskeletal 3 (65 kDa cytokeratin) (Cytokeratin-3) (CK-3) (Keratin-3) (K3) (Type-II keratin Kb3)	-0.997576	1.54623e-05
SYDC_HUMAN	7	DARS PIG40	Aspartate--tRNA ligase, cytoplasmic (EC 6.1.1.12) (Aspartyl-tRNA synthetase) (AspRS) (Cell proliferation-inducing gene 40 protein)	-0.998402	9.9198e-05
K1C10_HUMAN	40	KRT10 KPP	Keratin, type I cytoskeletal 10 (Cytokeratin-10) (CK-10) (Keratin-10) (K10)	-0.998794	0.0605634
ERAP1_HUMAN	3	ERAP1 APPILS ARTS1 KIAA0525 UNQ584/PRO1154	Endoplasmic reticulum aminopeptidase 1 (EC 3.4.11.-) (ARTS-1) (Adipocyte-derived leucine aminopeptidase) (A-LAP) (Aminopeptidase PILS) (Puromycin-insensitive leucyl-specific aminopeptidase) (PILS-AP) (Type 1 tumor necrosis factor receptor shedding aminopeptidase regulator)	-0.999949	0.00727371
RTN4_HUMAN	6	RTN4 KIAA0886 NOGO My043 SP1507	Reticulon-4 (Foocen) (Neurite outgrowth inhibitor) (Nogo protein) (Neuroendocrine-specific protein) (NSP) (Neuroendocrine-specific protein C homolog) (RTN-x) (Reticulon-5)	-1.00067	0.00178584
NB5R1_HUMAN	7	CYB5R1 NQO3A2 UNQ3049/PRO9865	NADH-cytochrome b5 reductase 1 (b5R.1) (EC 1.6.2.2) (Humb5R2) (NAD(P)H:quinone oxidoreductase type 3 polypeptide A2)	-1.00177	0.000794667
RS11_HUMAN	3	RPS11	40S ribosomal protein S11 (Small ribosomal subunit protein uS17)	-1.00288	0.000277372
NUCB1_HUMAN	5	NUCB1 NUC	Nucleobindin-1 (CALNUC)	-1.00399	0.0125212
GLU2B_HUMAN	8	PRKCSH G19P1	Glucosidase 2 subunit beta (80K-H protein) (Glucosidase II subunit beta) (Protein kinase C substrate 60.1 kDa protein heavy chain) (PKCSH)	-1.00701	0.000177028
F120A_HUMAN	4	FAM120A C9orf10 KIAA0183 OSSA	Constitutive coactivator of PPAR-gamma-like protein 1 (Oxidative stress-associated Src activator) (Protein FAM120A)	-1.00777	0.00470258
S10AB_HUMAN	4	S100A11 MLN70 S100C	Protein S100-A11 (Calgizzarin) (Metastatic lymph node gene 70 protein) (MLN 70) (Protein S100-C) (S100 calcium-binding protein A11) [Cleaved into: Protein S100-A11, N-terminally processed]	-1.00782	0.00341243
RS7_HUMAN	7	RPS7	40S ribosomal protein S7 (Small ribosomal subunit protein eS7)	-1.00929	0.00011957
A0A024R0Y6_HUMAN	4			-1.00952	0.00113983
AACT_HUMAN	13	SERPINA3 AACT GIG24 GIG25	Alpha-1-antichymotrypsin (ACT) (Cell growth-inhibiting gene 24/25 protein) (Serpin A3) [Cleaved into: Alpha-1-antichymotrypsin His-Pro-less]	-1.01325	0.000284612
ADDA_HUMAN	5	ADD1 ADDA	Alpha-adducin (Erythrocyte adducin subunit alpha)	-1.01351	0.00592211
LIMC1_HUMAN	4	LIMCH1 KIAA1102	LIM and calponin homology domains-containing protein 1	-1.01642	0.00259026
RL31_HUMAN	5	RPL31	60S ribosomal protein L31 (Large ribosomal subunit protein eL31)	-1.01815	0.00271285
PCDH1_HUMAN	4	PCDH1	Protocadherin-1 (Cadherin-like protein 1) (Protocadherin-42) (PC42)	-1.02053	0.00922923
XPO1_HUMAN	6	XPO1 CRM1	Exportin-1 (Exp1) (Chromosome region maintenance 1 protein homolog)	-1.02077	0.00153927
A0A024RCM3_HUMAN	5			-1.02337	0.000392291
EF2_HUMAN	19	EEF2 EF2	Elongation factor 2 (EF-2)	-1.02369	5.42757e-05
ATPO_HUMAN	7	ATP5PO ATP5O ATPO	ATP synthase subunit O, mitochondrial (ATP synthase peripheral stalk subunit OSCP) (Oligomycin sensitivity conferral protein) (OSCP)	-1.02569	8.05791e-07
NACAM_HUMAN	5	NACA	Nascent polypeptide-associated complex subunit alpha, muscle-specific form (Alpha-NAC, muscle-specific form) (skNAC)	-1.0269	0.000232988
RS21_HUMAN	3	RPS21	40S ribosomal protein S21 (Small ribosomal subunit protein eS21)	-1.02967	0.00133743
GNAI2_HUMAN	8	GNAI2 GNAI2B	Guanine nucleotide-binding protein G(i) subunit alpha-2 (Adenylate cyclase-inhibiting G alpha protein)	-1.03063	0.0503965
RAD50_HUMAN	6	RAD50	DNA repair protein RAD50 (hRAD50) (EC 3.6.-.-)	-1.03257	0.00812523
ATP5I_HUMAN	3	ATP5ME ATP5I ATP5K	ATP synthase subunit e, mitochondrial (ATPase subunit e) (ATP synthase membrane subunit e) [Cleaved into: ATP synthase subunit e, mitochondrial, N-terminally processed]	-1.03268	0.0142365
FCL_HUMAN	3	TSTA3 SDR4E1	GDP-L-fucose synthase (EC 1.1.1.271) (GDP-4-keto-6-deoxy-D-mannose-3,5-epimerase-4-reductase) (Protein FX) (Red cell NADP(H)-binding protein) (Short-chain dehydrogenase/reductase family 4E member 1)	-1.03445	0.0111107
ACADV_HUMAN	13	ACADVL VLCAD	Very long-chain specific acyl-CoA dehydrogenase, mitochondrial (VLCAD) (EC 1.3.8.9)	-1.03669	5.19113e-07
IF4G1_HUMAN	4	EIF4G1 EIF4F EIF4G EIF4GI	Eukaryotic translation initiation factor 4 gamma 1 (eIF-4-gamma 1) (eIF-4G 1) (eIF-4G1) (p220)	-1.04146	0.00620427
RL3_HUMAN	3	RPL3 OK/SW-cl.32	60S ribosomal protein L3 (HIV-1 TAR RNA-binding protein B) (TARBP-B) (Large ribosomal subunit protein uL3)	-1.04263	0.00390773
AP1M1_HUMAN	3	AP1M1 CLTNM	AP-1 complex subunit mu-1 (AP-mu chain family member mu1A) (Adaptor protein complex AP-1 subunit mu-1) (Adaptor-related protein complex 1 subunit mu-1) (Clathrin assembly protein complex 1 mu-1 medium chain 1) (Clathrin coat assembly protein AP47) (Clathrin coat-associated protein AP47) (Golgi adaptor HA1/AP1 adaptin mu-1 subunit) (Mu-adaptin 1) (Mu1A-adaptin)	-1.04756	0.00877444
ANXA1_HUMAN	23	ANXA1 ANX1 LPC1	Annexin A1 (Annexin I) (Annexin-1) (Calpactin II) (Calpactin-2) (Chromobindin-9) (Lipocortin I) (Phospholipase A2 inhibitory protein) (p35)	-1.04756	0.134111
CTBP1_HUMAN	6	CTBP1 CTBP	C-terminal-binding protein 1 (CtBP1) (EC 1.1.1.-)	-1.04979	0.000723426
CALX_HUMAN	14	CANX	Calnexin (IP90) (Major histocompatibility complex class I antigen-binding protein p88) (p90)	-1.05362	0.00229989
SRRM2_HUMAN	7	SRRM2 KIAA0324 SRL300 SRM300 HSPC075	Serine/arginine repetitive matrix protein 2 (300 kDa nuclear matrix antigen) (Serine/arginine-rich splicing factor-related nuclear matrix protein of 300 kDa) (SR-related nuclear matrix protein of 300 kDa) (Ser/Arg-related nuclear matrix protein of 300 kDa) (Splicing coactivator subunit SRm300) (Tax-responsive enhancer element-binding protein 803) (TaxREB803)	-1.05637	0.00520297
RS6_HUMAN	5	RPS6 OK/SW-cl.2	40S ribosomal protein S6 (Phosphoprotein NP33) (Small ribosomal subunit protein eS6)	-1.05966	0.00196194
HP1B3_HUMAN	7	HP1BP3	Heterochromatin protein 1-binding protein 3 (Protein HP1-BP74)	-1.06103	1.39229e-06
MATR3_HUMAN	10	MATR3 KIAA0723	Matrin-3	-1.06229	1.36649e-06
PKP1_HUMAN	5	PKP1	Plakophilin-1 (Band 6 protein) (B6P)	-1.06255	0.00168914
CYFP1_HUMAN	12	CYFIP1 KIAA0068	Cytoplasmic FMR1-interacting protein 1 (Specifically Rac1-associated protein 1) (Sra-1) (p140sra-1)	-1.06565	5.02415e-09
NEST_HUMAN	13	NES Nbla00170	Nestin	-1.06645	6.75113e-09
SC31A_HUMAN	6	SEC31A KIAA0905 SEC31L1 HSPC275 HSPC334	Protein transport protein Sec31A (ABP125) (ABP130) (SEC31-like protein 1) (SEC31-related protein A) (Web1-like protein)	-1.0679	0.000398274
FUBP3_HUMAN	3	FUBP3 FBP3	Far upstream element-binding protein 3 (FUSE-binding protein 3)	-1.07211	0.00280674
SRPRB_HUMAN	4	SRPRB PSEC0230	Signal recognition particle receptor subunit beta (SR-beta) (Protein APMCF1)	-1.07237	0.00190029
HORN_HUMAN	13	HRNR S100A18	Hornerin	-1.07308	0.0979633
IDHP_HUMAN	11	IDH2	Isocitrate dehydrogenase [NADP], mitochondrial (IDH) (EC 1.1.1.42) (ICD-M) (IDP) (NADP(+)-specific ICDH) (Oxalosuccinate decarboxylase)	-1.0747	1.0568e-05
RHOC_HUMAN	3	RHOC ARH9 ARHC	Rho-related GTP-binding protein RhoC (Rho cDNA clone 9) (h9)	-1.07503	0.000126669
HEXB_HUMAN	4	HEXB HCC7	Beta-hexosaminidase subunit beta (EC 3.2.1.52) (Beta-N-acetylhexosaminidase subunit beta) (Hexosaminidase subunit B) (Cervical cancer proto-oncogene 7 protein) (HCC-7) (N-acetyl-beta-glucosaminidase subunit beta) [Cleaved into: Beta-hexosaminidase subunit beta chain B; Beta-hexosaminidase subunit beta chain A]	-1.07506	7.01268e-05
NAMPT_HUMAN	4	NAMPT PBEF PBEF1	Nicotinamide phosphoribosyltransferase (NAmPRTase) (Nampt) (EC 2.4.2.12) (Pre-B-cell colony-enhancing factor 1) (Pre-B cell-enhancing factor) (Visfatin)	-1.08288	0.000755809
SFPQ_HUMAN	10	SFPQ PSF	Splicing factor, proline- and glutamine-rich (100 kDa DNA-pairing protein) (hPOMp100) (DNA-binding p52/p100 complex, 100 kDa subunit) (Polypyrimidine tract-binding protein-associated-splicing factor) (PSF) (PTB-associated-splicing factor)	-1.08314	1.88196e-05
PSB9_HUMAN	3	PSMB9 LMP2 PSMB6i RING12	Proteasome subunit beta type-9 (EC 3.4.25.1) (Low molecular mass protein 2) (Macropain chain 7) (Multicatalytic endopeptidase complex chain 7) (Proteasome chain 7) (Proteasome subunit beta-1i) (Really interesting new gene 12 protein)	-1.08411	0.00148168
ARF4_HUMAN	10	ARF4 ARF2	ADP-ribosylation factor 4	-1.08519	6.50476e-06
MTA3_HUMAN	3	MTA3 KIAA1266	Metastasis-associated protein MTA3	-1.08607	0.000184758
RS3_HUMAN	16	RPS3 OK/SW-cl.26	40S ribosomal protein S3 (EC 4.2.99.18) (Small ribosomal subunit protein uS3)	-1.09177	7.92865e-05
MPRI_HUMAN	3	IGF2R MPRI	Cation-independent mannose-6-phosphate receptor (CI Man-6-P receptor) (CI-MPR) (M6PR) (300 kDa mannose 6-phosphate receptor) (MPR 300) (Insulin-like growth factor 2 receptor) (Insulin-like growth factor II receptor) (IGF-II receptor) (M6P/IGF2 receptor) (M6P/IGF2R) (CD antigen CD222)	-1.09183	0.0176753
CKAP4_HUMAN	18	CKAP4	Cytoskeleton-associated protein 4 (63-kDa cytoskeleton-linking membrane protein) (Climp-63) (p63)	-1.09314	1.21962e-08
DSG1_HUMAN	21	DSG1 CDHF4	Desmoglein-1 (Cadherin family member 4) (Desmosomal glycoprotein 1) (DG1) (DGI) (Pemphigus foliaceus antigen)	-1.09395	0.00156863
LAMP1_HUMAN	5	LAMP1	Lysosome-associated membrane glycoprotein 1 (LAMP-1) (Lysosome-associated membrane protein 1) (CD107 antigen-like family member A) (CD antigen CD107a)	-1.09561	0.000147878
TRA2B_HUMAN	4	TRA2B SFRS10	Transformer-2 protein homolog beta (TRA-2 beta) (TRA2-beta) (hTRA2-beta) (Splicing factor, arginine/serine-rich 10) (Transformer-2 protein homolog B)	-1.0976	0.0172291
PRS7_HUMAN	4	PSMC2 MSS1	26S proteasome regulatory subunit 7 (26S proteasome AAA-ATPase subunit RPT1) (Proteasome 26S subunit ATPase 2) (Protein MSS1)	-1.09852	0.000403024
A0A024QYU9_HUMAN	7			-1.09967	0.000859731
ENOG_HUMAN	5	ENO2	Gamma-enolase (EC 4.2.1.11) (2-phospho-D-glycerate hydro-lyase) (Enolase 2) (Neural enolase) (Neuron-specific enolase) (NSE)	-1.10012	0.000461679
RS18_HUMAN	6	RPS18 D6S218E	40S ribosomal protein S18 (Ke-3) (Ke3) (Small ribosomal subunit protein uS13)	-1.10428	0.00119997
EMAL4_HUMAN	3	EML4 C2orf2 EMAPL4	Echinoderm microtubule-associated protein-like 4 (EMAP-4) (Restrictedly overexpressed proliferation-associated protein) (Ropp 120)	-1.10457	0.00279525
SPB12_HUMAN	7	SERPINB12	Serpin B12	-1.1075	0.000140581
SC22B_HUMAN	6	SEC22B SEC22L1	Vesicle-trafficking protein SEC22b (ER-Golgi SNARE of 24 kDa) (ERS-24) (ERS24) (SEC22 vesicle-trafficking protein homolog B) (SEC22 vesicle-trafficking protein-like 1)	-1.11005	0.0149825
HNRPQ_HUMAN	6	SYNCRIP HNRPQ NSAP1	Heterogeneous nuclear ribonucleoprotein Q (hnRNP Q) (Glycine- and tyrosine-rich RNA-binding protein) (GRY-RBP) (NS1-associated protein 1) (Synaptotagmin-binding, cytoplasmic RNA-interacting protein)	-1.11034	0.000607184
SAHH_HUMAN	10	AHCY SAHH	Adenosylhomocysteinase (AdoHcyase) (EC 3.3.1.1) (S-adenosyl-L-homocysteine hydrolase)	-1.11272	9.83093e-07
PDIA3_HUMAN	24	PDIA3 ERP57 ERP60 GRP58	Protein disulfide-isomerase A3 (EC 5.3.4.1) (58 kDa glucose-regulated protein) (58 kDa microsomal protein) (p58) (Disulfide isomerase ER-60) (Endoplasmic reticulum resident protein 57) (ER protein 57) (ERp57) (Endoplasmic reticulum resident protein 60) (ER protein 60) (ERp60)	-1.11609	0.122809
POF1B_HUMAN	5	POF1B	Protein POF1B (Premature ovarian failure protein 1B)	-1.11611	0.00120979
PPIB_HUMAN	9	PPIB CYPB	Peptidyl-prolyl cis-trans isomerase B (PPIase B) (EC 5.2.1.8) (CYP-S1) (Cyclophilin B) (Rotamase B) (S-cyclophilin) (SCYLP)	-1.11985	4.84187e-06
RPR1B_HUMAN	3	RPRD1B C20orf77 CREPT	Regulation of nuclear pre-mRNA domain-containing protein 1B (Cell cycle-related and expression-elevated protein in tumor)	-1.12443	0.00373437
PFKAL_HUMAN	6	PFKL	ATP-dependent 6-phosphofructokinase, liver type (ATP-PFK) (PFK-L) (EC 2.7.1.11) (6-phosphofructokinase type B) (Phosphofructo-1-kinase isozyme B) (PFK-B) (Phosphohexokinase)	-1.12498	4.79413e-05
IDHC_HUMAN	12	IDH1 PICD	Isocitrate dehydrogenase [NADP] cytoplasmic (IDH) (EC 1.1.1.42) (Cytosolic NADP-isocitrate dehydrogenase) (IDP) (NADP(+)-specific ICDH) (Oxalosuccinate decarboxylase)	-1.12658	1.48723e-07
VPS35_HUMAN	10	VPS35 MEM3 TCCCTA00141	Vacuolar protein sorting-associated protein 35 (hVPS35) (Maternal-embryonic 3) (Vesicle protein sorting 35)	-1.12897	2.79866e-05
SC23B_HUMAN	3	SEC23B	Protein transport protein Sec23B (hSec23B) (SEC23-related protein B)	-1.13238	0.0053047
ROA3_HUMAN	13	HNRNPA3 HNRPA3	Heterogeneous nuclear ribonucleoprotein A3 (hnRNP A3)	-1.13254	0.00995406
DSC1_HUMAN	7	DSC1 CDHF1	Desmocollin-1 (Cadherin family member 1) (Desmosomal glycoprotein 2/3) (DG2/DG3)	-1.137	0.0189074
PSA2_HUMAN	6	PSMA2 HC3 PSC3	Proteasome subunit alpha type-2 (EC 3.4.25.1) (Macropain subunit C3) (Multicatalytic endopeptidase complex subunit C3) (Proteasome component C3)	-1.13945	0.00176202
GANAB_HUMAN	28	GANAB G2AN KIAA0088	Neutral alpha-glucosidase AB (EC 3.2.1.207) (Alpha-glucosidase 2) (Glucosidase II subunit alpha)	-1.14064	3.13985e-05
AT5F1_HUMAN	4	ATP5PB ATP5F1	ATP synthase F(0) complex subunit B1, mitochondrial (ATP synthase peripheral stalk-membrane subunit b) (ATP synthase proton-transporting mitochondrial F(0) complex subunit B1) (ATP synthase subunit b) (ATPase subunit b)	-1.14153	0.0102703
RS4X_HUMAN	6	RPS4X CCG2 RPS4 SCAR	40S ribosomal protein S4, X isoform (SCR10) (Single copy abundant mRNA protein) (Small ribosomal subunit protein eS4)	-1.14452	0.00551791
NUMA1_HUMAN	25	NUMA1 NMP22 NUMA	Nuclear mitotic apparatus protein 1 (Nuclear matrix protein-22) (NMP-22) (Nuclear mitotic apparatus protein) (NuMA protein) (SP-H antigen)	-1.14651	8.758e-14
RBM39_HUMAN	4	RBM39 HCC1 RNPC2	RNA-binding protein 39 (CAPER alpha) (Hepatocellular carcinoma protein 1) (RNA-binding motif protein 39) (RNA-binding region-containing protein 2) (Splicing factor HCC1)	-1.14729	0.00471522
SF3A1_HUMAN	4	SF3A1 SAP114	Splicing factor 3A subunit 1 (SF3a120) (Spliceosome-associated protein 114) (SAP 114)	-1.1476	0.00715623
CCAR2_HUMAN	7	CCAR2 DBC1 KIAA1967	Cell cycle and apoptosis regulator protein 2 (Cell division cycle and apoptosis regulator protein 2) (DBIRD complex subunit KIAA1967) (Deleted in breast cancer gene 1 protein) (DBC-1) (DBC.1) (NET35) (p30 DBC)	-1.14803	9.46267e-07
KCD12_HUMAN	7	KCTD12 C13orf2 KIAA1778 PFET1	BTB/POZ domain-containing protein KCTD12 (Pfetin) (Predominantly fetal expressed T1 domain)	-1.1481	1.49691e-05
AP2S1_HUMAN	3	AP2S1 AP17 CLAPS2	AP-2 complex subunit sigma (Adaptor protein complex AP-2 subunit sigma) (Adaptor-related protein complex 2 subunit sigma) (Clathrin assembly protein 2 sigma small chain) (Clathrin coat assembly protein AP17) (Clathrin coat-associated protein AP17) (HA2 17 kDa subunit) (Plasma membrane adaptor AP-2 17 kDa protein) (Sigma2-adaptin)	-1.14922	0.00819149
ARPC5_HUMAN	4	ARPC5 ARC16	Actin-related protein 2/3 complex subunit 5 (Arp2/3 complex 16 kDa subunit) (p16-ARC)	-1.1536	0.0061434
ERP44_HUMAN	3	ERP44 KIAA0573 TXNDC4 UNQ532/PRO1075	Endoplasmic reticulum resident protein 44 (ER protein 44) (ERp44) (Thioredoxin domain-containing protein 4)	-1.15549	0.000724409
STOM_HUMAN	12	STOM BND7 EPB72	Erythrocyte band 7 integral membrane protein (Protein 7.2b) (Stomatin)	-1.15875	0.000463203
SPTN2_HUMAN	11	SPTBN2 KIAA0302 SCA5	Spectrin beta chain, non-erythrocytic 2 (Beta-III spectrin) (Spinocerebellar ataxia 5 protein)	-1.1611	4.85114e-07
ENPL_HUMAN	30	HSP90B1 GRP94 TRA1	Endoplasmin (94 kDa glucose-regulated protein) (GRP-94) (Heat shock protein 90 kDa beta member 1) (Tumor rejection antigen 1) (gp96 homolog)	-1.16496	0.0071844
IF4H_HUMAN	3	EIF4H KIAA0038 WBSCR1 WSCR1	Eukaryotic translation initiation factor 4H (eIF-4H) (Williams-Beuren syndrome chromosomal region 1 protein)	-1.17145	0.0106034
PRP8_HUMAN	11	PRPF8 PRPC8	Pre-mRNA-processing-splicing factor 8 (220 kDa U5 snRNP-specific protein) (PRP8 homolog) (Splicing factor Prp8) (p220)	-1.17686	8.5336e-07
GSHR_HUMAN	5	GSR GLUR GRD1	Glutathione reductase, mitochondrial (GR) (GRase) (EC 1.8.1.7)	-1.17752	0.00018371
CISY_HUMAN	8	CS	Citrate synthase, mitochondrial (EC 2.3.3.1) (Citrate (Si)-synthase)	-1.17796	2.96508e-06
SNX1_HUMAN	3	SNX1	Sorting nexin-1	-1.17941	0.000725178
K2C78_HUMAN	15	KRT78 K5B KB40	Keratin, type II cytoskeletal 78 (Cytokeratin-78) (CK-78) (Keratin-5b) (Keratin-78) (K78) (Type-II keratin Kb40)	-1.18191	0.00115124
RS4Y1_HUMAN	4	RPS4Y1 RPS4Y PRO2646	40S ribosomal protein S4, Y isoform 1 (Small ribosomal subunit protein eS4)	-1.18231	0.003111
COPD_HUMAN	3	ARCN1 COPD	Coatomer subunit delta (Archain) (Delta-coat protein) (Delta-COP)	-1.18251	0.00288778
NPS3A_HUMAN	4	NIPSNAP3A NIPSNAP4 HSPC299	Protein NipSnap homolog 3A (NipSnap3A) (Protein NipSnap homolog 4) (NipSnap4) (Target for Salmonella secreted protein C) (TassC)	-1.18553	0.000120949
1B07_HUMAN	5	HLA-B HLAB	HLA class I histocompatibility antigen, B-7 alpha chain (MHC class I antigen B*7)	-1.18738	0.317282
BIEA_HUMAN	7	BLVRA BLVR BVR	Biliverdin reductase A (BVR A) (EC 1.3.1.24) (Biliverdin-IX alpha-reductase)	-1.18963	0.000489096
BDH2_HUMAN	4	BDH2 DHRS6 SDR15C1 UNQ6308/PRO20933	3-hydroxybutyrate dehydrogenase type 2 (EC 1.1.1.-) (EC 1.1.1.30) (Dehydrogenase/reductase SDR family member 6) (Oxidoreductase UCPA) (R-beta-hydroxybutyrate dehydrogenase) (Short chain dehydrogenase/reductase family 15C member 1)	-1.19034	0.000200508
SRSF7_HUMAN	6	SRSF7 SFRS7	Serine/arginine-rich splicing factor 7 (Splicing factor 9G8) (Splicing factor, arginine/serine-rich 7)	-1.19066	0.000912421
HNRPC_HUMAN	5	HNRNPC HNRPC	Heterogeneous nuclear ribonucleoproteins C1/C2 (hnRNP C1/C2)	-1.19346	0.0106877
TR150_HUMAN	3	THRAP3 BCLAF2 TRAP150	Thyroid hormone receptor-associated protein 3 (BCLAF1 and THRAP3 family member 2) (Thyroid hormone receptor-associated protein complex 150 kDa component) (Trap150)	-1.19542	0.0197966
A0A087WV22_HUMAN	3	RPL10	60S ribosomal protein L10	-1.19793	4.75423e-05
CLH2_HUMAN	12	CLTCL1 CLH22 CLTCL CLTD	Clathrin heavy chain 2 (Clathrin heavy chain on chromosome 22) (CLH-22)	-1.19851	0.00592398
CTNA1_HUMAN	5	CTNNA1	Catenin alpha-1 (Alpha E-catenin) (Cadherin-associated protein) (Renal carcinoma antigen NY-REN-13)	-1.19852	0.00419299
RS8_HUMAN	5	RPS8 OK/SW-cl.83	40S ribosomal protein S8 (Small ribosomal subunit protein eS8)	-1.20352	2.03117e-06
VATB2_HUMAN	4	ATP6V1B2 ATP6B2 VPP3	V-type proton ATPase subunit B, brain isoform (V-ATPase subunit B 2) (Endomembrane proton pump 58 kDa subunit) (HO57) (Vacuolar proton pump subunit B 2)	-1.2051	0.0014227
SERPH_HUMAN	12	SERPINH1 CBP1 CBP2 HSP47 SERPINH2 PIG14	Serpin H1 (47 kDa heat shock protein) (Arsenic-transactivated protein 3) (AsTP3) (Cell proliferation-inducing gene 14 protein) (Collagen-binding protein) (Colligin) (Rheumatoid arthritis-related antigen RA-A47)	-1.20872	1.67808e-06
ECHM_HUMAN	5	ECHS1	Enoyl-CoA hydratase, mitochondrial (EC 4.2.1.17) (Enoyl-CoA hydratase 1) (Short-chain enoyl-CoA hydratase) (SCEH)	-1.21268	1.15788e-05
PLAK_HUMAN	20	JUP CTNNG DP3	Junction plakoglobin (Catenin gamma) (Desmoplakin III) (Desmoplakin-3)	-1.21364	0.000413389
ECH1_HUMAN	5	ECH1	Delta(3,5)-Delta(2,4)-dienoyl-CoA isomerase, mitochondrial (EC 5.3.3.-)	-1.21432	0.000188262
UCRI_HUMAN	4	UQCRFS1	Cytochrome b-c1 complex subunit Rieske, mitochondrial (EC 7.1.1.8) (Complex III subunit 5) (Cytochrome b-c1 complex subunit 5) (Rieske iron-sulfur protein) (RISP) (Rieske protein UQCRFS1) (Ubiquinol-cytochrome c reductase iron-sulfur subunit) [Cleaved into: Cytochrome b-c1 complex subunit 9 (Su9) (Subunit 9) (8 kDa subunit 9) (Complex III subunit IX) (Cytochrome b-c1 complex subunit 11) (Ubiquino…	-1.21587	0.00345719
OST48_HUMAN	9	DDOST KIAA0115 OST48 OK/SW-cl.45	Dolichyl-diphosphooligosaccharide--protein glycosyltransferase 48 kDa subunit (DDOST 48 kDa subunit) (Oligosaccharyl transferase 48 kDa subunit)	-1.2162	9.34094e-08
CBX3_HUMAN	3	CBX3	Chromobox protein homolog 3 (HECH) (Heterochromatin protein 1 homolog gamma) (HP1 gamma) (Modifier 2 protein)	-1.21853	0.000174021
PHB2_HUMAN	12	PHB2 BAP REA	Prohibitin-2 (B-cell receptor-associated protein BAP37) (D-prohibitin) (Repressor of estrogen receptor activity)	-1.2215	6.60026e-06
AP1B1_HUMAN	12	AP1B1 ADTB1 BAM22 CLAPB2	AP-1 complex subunit beta-1 (Adaptor protein complex AP-1 subunit beta-1) (Adaptor-related protein complex 1 subunit beta-1) (Beta-1-adaptin) (Beta-adaptin 1) (Clathrin assembly protein complex 1 beta large chain) (Golgi adaptor HA1/AP1 adaptin beta subunit)	-1.22814	6.73378e-08
ELAV1_HUMAN	5	ELAVL1 HUR	ELAV-like protein 1 (Hu-antigen R) (HuR)	-1.23127	2.18049e-05
SRSF1_HUMAN	7	SRSF1 ASF SF2 SF2P33 SFRS1 OK/SW-cl.3	Serine/arginine-rich splicing factor 1 (Alternative-splicing factor 1) (ASF-1) (Splicing factor, arginine/serine-rich 1) (pre-mRNA-splicing factor SF2, P33 subunit)	-1.23413	2.24392e-05
MOGS_HUMAN	7	MOGS GCS1	Mannosyl-oligosaccharide glucosidase (EC 3.2.1.106) (Processing A-glucosidase I)	-1.23587	2.47102e-07
CLH1_HUMAN	37	CLTC CLH17 CLTCL2 KIAA0034	Clathrin heavy chain 1 (Clathrin heavy chain on chromosome 17) (CLH-17)	-1.23726	0.0176705
RLA2_HUMAN	5	RPLP2 D11S2243E RPP2	60S acidic ribosomal protein P2 (Large ribosomal subunit protein P2) (Renal carcinoma antigen NY-REN-44)	-1.23826	0.000266111
RACK1_HUMAN	8	RACK1 GNB2L1 HLC7 PIG21	Receptor of activated protein C kinase 1 (Cell proliferation-inducing gene 21 protein) (Guanine nucleotide-binding protein subunit beta-2-like 1) (Guanine nucleotide-binding protein subunit beta-like protein 12.3) (Human lung cancer oncogene 7 protein) (HLC-7) (Receptor for activated C kinase) (Small ribosomal subunit protein RACK1) [Cleaved into: Receptor of activated protein C kinase 1, N-termi…	-1.24014	3.47375e-06
CH10_HUMAN	3	HSPE1	10 kDa heat shock protein, mitochondrial (Hsp10) (10 kDa chaperonin) (Chaperonin 10) (CPN10) (Early-pregnancy factor) (EPF)	-1.24096	0.0176791
ODPA_HUMAN	5	PDHA1 PHE1A	Pyruvate dehydrogenase E1 component subunit alpha, somatic form, mitochondrial (EC 1.2.4.1) (PDHE1-A type I)	-1.24459	0.00101848
CLIC1_HUMAN	8	CLIC1 G6 NCC27	Chloride intracellular channel protein 1 (Chloride channel ABP) (Nuclear chloride ion channel 27) (NCC27) (Regulatory nuclear chloride ion channel protein) (hRNCC)	-1.24601	0.0020543
STAT1_HUMAN	4	STAT1	Signal transducer and activator of transcription 1-alpha/beta (Transcription factor ISGF-3 components p91/p84)	-1.24747	0.000297877
RS19_HUMAN	9	RPS19	40S ribosomal protein S19 (Small ribosomal subunit protein eS19)	-1.2501	1.75148e-05
SCMC1_HUMAN	6	SLC25A24 APC1 MCSC1 SCAMC1	Calcium-binding mitochondrial carrier protein SCaMC-1 (Mitochondrial ATP-Mg/Pi carrier protein 1) (Mitochondrial Ca(2+)-dependent solute carrier protein 1) (Small calcium-binding mitochondrial carrier protein 1) (Solute carrier family 25 member 24)	-1.25403	1.94537e-05
1A03_HUMAN	11	HLA-A HLAA	HLA class I histocompatibility antigen, A-3 alpha chain (MHC class I antigen A*3)	-1.25768	0.00341243
RAB7A_HUMAN	10	RAB7A RAB7	Ras-related protein Rab-7a	-1.2578	2.25927e-05
C4BPA_HUMAN	5	C4BPA C4BP	C4b-binding protein alpha chain (C4bp) (Proline-rich protein) (PRP)	-1.25834	0.000156496
FILA2_HUMAN	12	FLG2 IFPS	Filaggrin-2 (FLG-2) (Intermediate filament-associated and psoriasis-susceptibility protein) (Ifapsoriasin)	-1.25889	3.43012e-06
AIFM1_HUMAN	4	AIFM1 AIF PDCD8	Apoptosis-inducing factor 1, mitochondrial (EC 1.1.1.-) (Programmed cell death protein 8)	-1.25973	0.000264896
PA2G4_HUMAN	6	PA2G4 EBP1	Proliferation-associated protein 2G4 (Cell cycle protein p38-2G4 homolog) (hG4-1) (ErbB3-binding protein 1)	-1.26016	1.54799e-05
DYN2_HUMAN	7	DNM2 DYN2	Dynamin-2 (EC 3.6.5.5)	-1.26374	2.11701e-10
RL27_HUMAN	3	RPL27	60S ribosomal protein L27 (Large ribosomal subunit protein eL27)	-1.26486	0.00071756
RL24_HUMAN	3	RPL24	60S ribosomal protein L24 (60S ribosomal protein L30) (Large ribosomal subunit protein eL24)	-1.26489	2.73459e-05
AQP1_HUMAN	3	AQP1 CHIP28	Aquaporin-1 (AQP-1) (Aquaporin-CHIP) (Urine water channel) (Water channel protein for red blood cells and kidney proximal tubule)	-1.26551	0.0148019
NUCL_HUMAN	15	NCL	Nucleolin (Protein C23)	-1.2665	4.23168e-07
PRDX4_HUMAN	7	PRDX4	Peroxiredoxin-4 (EC 1.11.1.15) (Antioxidant enzyme AOE372) (AOE37-2) (Peroxiredoxin IV) (Prx-IV) (Thioredoxin peroxidase AO372) (Thioredoxin-dependent peroxide reductase A0372)	-1.26999	1.33076e-05
RL7A_HUMAN	11	RPL7A SURF-3 SURF3	60S ribosomal protein L7a (Large ribosomal subunit protein eL8) (PLA-X polypeptide) (Surfeit locus protein 3)	-1.27031	0.000541708
HBB_HUMAN	13	HBB	Hemoglobin subunit beta (Beta-globin) (Hemoglobin beta chain) [Cleaved into: LVV-hemorphin-7; Spinorphin]	-1.27167	0.2929
RUVB2_HUMAN	5	RUVBL2 INO80J TIP48 TIP49B CGI-46	RuvB-like 2 (EC 3.6.4.12) (48 kDa TATA box-binding protein-interacting protein) (48 kDa TBP-interacting protein) (51 kDa erythrocyte cytosolic protein) (ECP-51) (INO80 complex subunit J) (Repressing pontin 52) (Reptin 52) (TIP49b) (TIP60-associated protein 54-beta) (TAP54-beta)	-1.27223	2.70432e-05
H2AV_HUMAN	4	H2AFV H2AV	Histone H2A.V (H2A.F/Z)	-1.27411	0.00204279
RPN2_HUMAN	8	RPN2	Dolichyl-diphosphooligosaccharide--protein glycosyltransferase subunit 2 (Dolichyl-diphosphooligosaccharide--protein glycosyltransferase 63 kDa subunit) (RIBIIR) (Ribophorin II) (RPN-II) (Ribophorin-2)	-1.27642	2.25298e-06
A0A024R895_HUMAN	3			-1.28127	0.00260896
RL18_HUMAN	6	RPL18	60S ribosomal protein L18 (Large ribosomal subunit protein eL18)	-1.28192	9.91941e-06
HKDC1_HUMAN	4	HKDC1	Putative hexokinase HKDC1 (EC 2.7.1.1) (Hexokinase domain-containing protein 1)	-1.28202	0.000264775
RECQ1_HUMAN	3	RECQL RECQ1 RECQL1	ATP-dependent DNA helicase Q1 (EC 3.6.4.12) (DNA helicase, RecQ-like type 1) (RecQ1) (DNA-dependent ATPase Q1) (RecQ protein-like 1)	-1.28267	0.00299557
TYPH_HUMAN	6	TYMP ECGF1	Thymidine phosphorylase (TP) (EC 2.4.2.4) (Gliostatin) (Platelet-derived endothelial cell growth factor) (PD-ECGF) (TdRPase)	-1.28408	3.49888e-05
RS16_HUMAN	9	RPS16	40S ribosomal protein S16 (Small ribosomal subunit protein uS9)	-1.28629	7.79437e-05
EF1D_HUMAN	10	EEF1D EF1D	Elongation factor 1-delta (EF-1-delta) (Antigen NY-CO-4)	-1.28697	6.15681e-07
TBD2A_HUMAN	3	TBC1D2 PARIS1 PP8997 TBC1D2A	TBC1 domain family member 2A (Armus) (Prostate antigen recognized and identified by SEREX 1) (PARIS-1)	-1.28705	0.0163493
RL23A_HUMAN	6	RPL23A	60S ribosomal protein L23a (Large ribosomal subunit protein uL23)	-1.28799	4.22709e-07
RSSA_HUMAN	6	RPSA LAMBR LAMR1	40S ribosomal protein SA (37 kDa laminin receptor precursor) (37LRP) (37/67 kDa laminin receptor) (LRP/LR) (67 kDa laminin receptor) (67LR) (Colon carcinoma laminin-binding protein) (Laminin receptor 1) (LamR) (Laminin-binding protein precursor p40) (LBP/p40) (Multidrug resistance-associated protein MGr1-Ag) (NEM/1CHD4) (Small ribosomal subunit protein uS2)	-1.28836	7.28594e-05
LEG3_HUMAN	6	LGALS3 MAC2	Galectin-3 (Gal-3) (35 kDa lectin) (Carbohydrate-binding protein 35) (CBP 35) (Galactose-specific lectin 3) (Galactoside-binding protein) (GALBP) (IgE-binding protein) (L-31) (Laminin-binding protein) (Lectin L-29) (Mac-2 antigen)	-1.28893	6.74913e-06
MOES_HUMAN	39	MSN	Moesin (Membrane-organizing extension spike protein)	-1.29262	0.0292401
EIF3F_HUMAN	6	EIF3F EIF3S5	Eukaryotic translation initiation factor 3 subunit F (eIF3f) (Deubiquitinating enzyme eIF3f) (EC 3.4.19.12) (Eukaryotic translation initiation factor 3 subunit 5) (eIF-3-epsilon) (eIF3 p47)	-1.29286	4.28933e-06
TXTP_HUMAN	4	SLC25A1 SLC20A3	Tricarboxylate transport protein, mitochondrial (Citrate transport protein) (CTP) (Solute carrier family 25 member 1) (Tricarboxylate carrier protein)	-1.29303	0.00013038
VP26A_HUMAN	5	VPS26A VPS26	Vacuolar protein sorting-associated protein 26A (Vesicle protein sorting 26A) (hVPS26)	-1.29899	9.90919e-07
PABP3_HUMAN	7	PABPC3 PABP3 PABPL3	Polyadenylate-binding protein 3 (PABP-3) (Poly(A)-binding protein 3) (Testis-specific poly(A)-binding protein)	-1.30046	2.22918e-09
ARGI1_HUMAN	10	ARG1	Arginase-1 (EC 3.5.3.1) (Liver-type arginase) (Type I arginase)	-1.3063	1.61304e-08
HNRPK_HUMAN	16	HNRNPK HNRPK	Heterogeneous nuclear ribonucleoprotein K (hnRNP K) (Transformation up-regulated nuclear protein) (TUNP)	-1.30654	0.00520297
RS13_HUMAN	6	RPS13	40S ribosomal protein S13 (Small ribosomal subunit protein uS15)	-1.30772	1.63911e-05
H1X_HUMAN	5	H1FX	Histone H1x	-1.30841	0.000236691
DX39B_HUMAN	4	DDX39B BAT1 UAP56	Spliceosome RNA helicase DDX39B (EC 3.6.4.13) (56 kDa U2AF65-associated protein) (ATP-dependent RNA helicase p47) (DEAD box protein UAP56) (HLA-B-associated transcript 1 protein)	-1.31045	2.05392e-06
LAMA3_HUMAN	3	LAMA3 LAMNA	Laminin subunit alpha-3 (Epiligrin 170 kDa subunit) (E170) (Epiligrin subunit alpha) (Kalinin subunit alpha) (Laminin-5 subunit alpha) (Laminin-6 subunit alpha) (Laminin-7 subunit alpha) (Nicein subunit alpha)	-1.31189	0.00620427
MPCP_HUMAN	6	SLC25A3 PHC OK/SW-cl.48	Phosphate carrier protein, mitochondrial (Phosphate transport protein) (PTP) (Solute carrier family 25 member 3)	-1.31305	3.42389e-06
PHB_HUMAN	9	PHB	Prohibitin	-1.31331	8.12203e-07
GBB4_HUMAN	3	GNB4	Guanine nucleotide-binding protein subunit beta-4 (Transducin beta chain 4)	-1.31504	0.000182268
HNRPF_HUMAN	4	HNRNPF HNRPF	Heterogeneous nuclear ribonucleoprotein F (hnRNP F) (Nucleolin-like protein mcs94-1) [Cleaved into: Heterogeneous nuclear ribonucleoprotein F, N-terminally processed]	-1.31524	5.58088e-06
PSME1_HUMAN	8	PSME1 IFI5111	Proteasome activator complex subunit 1 (11S regulator complex subunit alpha) (REG-alpha) (Activator of multicatalytic protease subunit 1) (Interferon gamma up-regulated I-5111 protein) (IGUP I-5111) (Proteasome activator 28 subunit alpha) (PA28a) (PA28alpha)	-1.31591	2.77834e-07
H4_HUMAN	15	HIST1H4A H4/A H4FA; HIST1H4B H4/I H4FI; HIST1H4C H4/G H4FG; HIST1H4D H4/B H4FB; HIST1H4E H4/J H4FJ; HIST1H4F H4/C H4FC; HIST1H4H H4/H H4FH; HIST1H4I H4/M H4FM; HIST1H4J H4/E H4FE; HIST1H4K H4/D H4FD; HIST1H4L H4/K H4FK; HIST2H4A H4/N H4F2 H4FN HIST2H4; HIST2H4B H4/O H4FO; HIST4H4	Histone H4	-1.3179	0.00436222
RS3A_HUMAN	7	RPS3A FTE1 MFTL	40S ribosomal protein S3a (Small ribosomal subunit protein eS1) (v-fos transformation effector protein) (Fte-1)	-1.31978	6.29895e-08
RL8_HUMAN	5	RPL8	60S ribosomal protein L8 (Large ribosomal subunit protein uL2)	-1.32009	6.33061e-05
NSF_HUMAN	5	NSF	Vesicle-fusing ATPase (EC 3.6.4.6) (N-ethylmaleimide-sensitive fusion protein) (NEM-sensitive fusion protein) (Vesicular-fusion protein NSF)	-1.32128	0.000769318
RL10A_HUMAN	5	RPL10A NEDD6	60S ribosomal protein L10a (CSA-19) (Large ribosomal subunit protein uL1) (Neural precursor cell expressed developmentally down-regulated protein 6) (NEDD-6)	-1.32361	0.000214527
RBBP4_HUMAN	4	RBBP4 RBAP48	Histone-binding protein RBBP4 (Chromatin assembly factor 1 subunit C) (CAF-1 subunit C) (Chromatin assembly factor I p48 subunit) (CAF-I 48 kDa subunit) (CAF-I p48) (Nucleosome-remodeling factor subunit RBAP48) (Retinoblastoma-binding protein 4) (RBBP-4) (Retinoblastoma-binding protein p48)	-1.32409	6.23521e-05
HMGB2_HUMAN	3	HMGB2 HMG2	High mobility group protein B2 (High mobility group protein 2) (HMG-2)	-1.32492	3.79393e-05
RL22_HUMAN	3	RPL22	60S ribosomal protein L22 (EBER-associated protein) (EAP) (Epstein-Barr virus small RNA-associated protein) (Heparin-binding protein HBp15) (Large ribosomal subunit protein eL22)	-1.32699	0.00914791
SAP_HUMAN	4	PSAP GLBA SAP1	Prosaposin (Proactivator polypeptide) [Cleaved into: Saposin-A (Protein A); Saposin-B-Val; Saposin-B (Cerebroside sulfate activator) (CSAct) (Dispersin) (Sphingolipid activator protein 1) (SAP-1) (Sulfatide/GM1 activator); Saposin-C (A1 activator) (Co-beta-glucosidase) (Glucosylceramidase activator) (Sphingolipid activator protein 2) (SAP-2); Saposin-D (Component C) (Protein C)]	-1.32889	0.00109386
H31T_HUMAN	7	HIST3H3 H3FT	Histone H3.1t (H3/t) (H3t) (H3/g)	-1.32964	0.010393
RL6_HUMAN	10	RPL6 TXREB1	60S ribosomal protein L6 (Large ribosomal subunit protein eL6) (Neoplasm-related protein C140) (Tax-responsive enhancer element-binding protein 107) (TaxREB107)	-1.3308	0.000203547
SPTA1_HUMAN	10	SPTA1 SPTA	Spectrin alpha chain, erythrocytic 1 (Erythroid alpha-spectrin)	-1.33209	6.624e-06
ARC1B_HUMAN	7	ARPC1B ARC41	Actin-related protein 2/3 complex subunit 1B (Arp2/3 complex 41 kDa subunit) (p41-ARC)	-1.33317	0.00744701
RALY_HUMAN	7	RALY HNRPCL2 P542	RNA-binding protein Raly (Autoantigen p542) (Heterogeneous nuclear ribonucleoprotein C-like 2) (hnRNP core protein C-like 2) (hnRNP associated with lethal yellow protein homolog)	-1.33719	8.67388e-06
ARP3_HUMAN	10	ACTR3 ARP3	Actin-related protein 3 (Actin-like protein 3)	-1.33733	9.2937e-09
K1C14_HUMAN	36	KRT14	Keratin, type I cytoskeletal 14 (Cytokeratin-14) (CK-14) (Keratin-14) (K14)	-1.33996	0.000859731
RBM3_HUMAN	3	RBM3 RNPL	RNA-binding protein 3 (RNA-binding motif protein 3) (RNPL)	-1.34174	7.61563e-05
LPPRC_HUMAN	5	LRPPRC LRP130	Leucine-rich PPR motif-containing protein, mitochondrial (130 kDa leucine-rich protein) (LRP 130) (GP130)	-1.3429	0.000114349
CPSF5_HUMAN	4	NUDT21 CFIM25 CPSF25 CPSF5	Cleavage and polyadenylation specificity factor subunit 5 (Cleavage and polyadenylation specificity factor 25 kDa subunit) (CPSF 25 kDa subunit) (Cleavage factor Im complex 25 kDa subunit) (CFIm25) (Nucleoside diphosphate-linked moiety X motif 21) (Nudix motif 21) (Nudix hydrolase 21) (Pre-mRNA cleavage factor Im 68 kDa subunit)	-1.34608	3.97619e-05
DJC13_HUMAN	4	DNAJC13 KIAA0678 RME8	DnaJ homolog subfamily C member 13 (Required for receptor-mediated endocytosis 8) (RME-8)	-1.34925	0.00188244
RS2_HUMAN	9	RPS2 RPS4	40S ribosomal protein S2 (40S ribosomal protein S4) (Protein LLRep3) (Small ribosomal subunit protein uS5)	-1.35174	1.75923e-07
PIGR_HUMAN	4	PIGR	Polymeric immunoglobulin receptor (PIgR) (Poly-Ig receptor) (Hepatocellular carcinoma-associated protein TB6) [Cleaved into: Secretory component]	-1.35441	0.00018157
IF4A3_HUMAN	6	EIF4A3 DDX48 KIAA0111	Eukaryotic initiation factor 4A-III (eIF-4A-III) (eIF4A-III) (EC 3.6.4.13) (ATP-dependent RNA helicase DDX48) (ATP-dependent RNA helicase eIF4A-3) (DEAD box protein 48) (Eukaryotic initiation factor 4A-like NUK-34) (Eukaryotic translation initiation factor 4A isoform 3) (Nuclear matrix protein 265) (NMP 265) (hNMP 265) [Cleaved into: Eukaryotic initiation factor 4A-III, N-terminally processed]	-1.35586	0.000285413
HBA_HUMAN	18	HBA1; HBA2	Hemoglobin subunit alpha (Alpha-globin) (Hemoglobin alpha chain)	-1.35719	0.000563925
DYSF_HUMAN	4	DYSF FER1L1	Dysferlin (Dystrophy-associated fer-1-like protein) (Fer-1-like protein 1)	-1.35947	0.00424528
M2OM_HUMAN	4	SLC25A11 SLC20A4	Mitochondrial 2-oxoglutarate/malate carrier protein (OGCP) (Solute carrier family 25 member 11)	-1.36499	0.000405851
HMGB1_HUMAN	4	HMGB1 HMG1	High mobility group protein B1 (High mobility group protein 1) (HMG-1)	-1.36501	0.00086866
EF1A2_HUMAN	8	EEF1A2 EEF1AL STN	Elongation factor 1-alpha 2 (EF-1-alpha-2) (Eukaryotic elongation factor 1 A-2) (eEF1A-2) (Statin-S1)	-1.36651	3.31869e-05
LTOR3_HUMAN	4	LAMTOR3 MAP2K1IP1 MAPKSP1 PRO2783	Ragulator complex protein LAMTOR3 (Late endosomal/lysosomal adaptor and MAPK and MTOR activator 3) (MEK-binding partner 1) (Mp1) (Mitogen-activated protein kinase kinase 1-interacting protein 1) (Mitogen-activated protein kinase scaffold protein 1)	-1.36853	0.000245759
RL17_HUMAN	3	RPL17	60S ribosomal protein L17 (60S ribosomal protein L23) (Large ribosomal subunit protein uL22) (PD-1)	-1.36855	0.00139661
ILF3_HUMAN	11	ILF3 DRBF MPHOSPH4 NF90	Interleukin enhancer-binding factor 3 (Double-stranded RNA-binding protein 76) (DRBP76) (M-phase phosphoprotein 4) (MPP4) (Nuclear factor associated with dsRNA) (NFAR) (Nuclear factor of activated T-cells 90 kDa) (NF-AT-90) (Translational control protein 80) (TCP80)	-1.3686	1.14325e-08
EF1G_HUMAN	11	EEF1G EF1G PRO1608	Elongation factor 1-gamma (EF-1-gamma) (eEF-1B gamma)	-1.36979	5.74159e-07
A2MG_HUMAN	32	A2M CPAMD5 FWP007	Alpha-2-macroglobulin (Alpha-2-M) (C3 and PZP-like alpha-2-macroglobulin domain-containing protein 5)	-1.37035	7.46183e-05
U520_HUMAN	9	SNRNP200 ASCC3L1 HELIC2 KIAA0788	U5 small nuclear ribonucleoprotein 200 kDa helicase (EC 3.6.4.13) (Activating signal cointegrator 1 complex subunit 3-like 1) (BRR2 homolog) (U5 snRNP-specific 200 kDa protein) (U5-200KD)	-1.37126	6.52674e-07
AKAP2_HUMAN	5	AKAP2 KIAA0920 PRKA2	A-kinase anchor protein 2 (AKAP-2) (AKAP-KL) (Protein kinase A-anchoring protein 2) (PRKA2)	-1.37129	8.55785e-05
DNPEP_HUMAN	6	DNPEP ASPEP DAP	Aspartyl aminopeptidase (EC 3.4.11.21)	-1.37405	5.67768e-05
RUXE_HUMAN	3	SNRPE	Small nuclear ribonucleoprotein E (snRNP-E) (Sm protein E) (Sm-E) (SmE)	-1.3775	0.000429834
COPG1_HUMAN	4	COPG1 COPG	Coatomer subunit gamma-1 (Gamma-1-coat protein) (Gamma-1-COP)	-1.37802	8.34188e-05
LBR_HUMAN	4	LBR	Delta(14)-sterol reductase (Delta-14-SR) (EC 1.3.1.70) (3-beta-hydroxysterol Delta (14)-reductase) (C-14 sterol reductase) (C14SR) (Integral nuclear envelope inner membrane protein) (LMN2R) (Lamin-B receptor) (Sterol C14-reductase)	-1.37828	0.000132544
VDAC1_HUMAN	5	VDAC1 VDAC	Voltage-dependent anion-selective channel protein 1 (VDAC-1) (hVDAC1) (Outer mitochondrial membrane protein porin 1) (Plasmalemmal porin) (Porin 31HL) (Porin 31HM)	-1.37836	8.3488e-05
SF3B3_HUMAN	9	SF3B3 KIAA0017 SAP130	Splicing factor 3B subunit 3 (Pre-mRNA-splicing factor SF3b 130 kDa subunit) (SF3b130) (STAF130) (Spliceosome-associated protein 130) (SAP 130)	-1.3824	3.88173e-08
PRKDC_HUMAN	27	PRKDC HYRC HYRC1	DNA-dependent protein kinase catalytic subunit (DNA-PK catalytic subunit) (DNA-PKcs) (EC 2.7.11.1) (DNPK1) (p460)	-1.38246	1.64737e-14
BIP_HUMAN	33	HSPA5 GRP78	Endoplasmic reticulum chaperone BiP (EC 3.6.4.10) (78 kDa glucose-regulated protein) (GRP-78) (Binding-immunoglobulin protein) (BiP) (Heat shock protein 70 family protein 5) (HSP70 family protein 5) (Heat shock protein family A member 5) (Immunoglobulin heavy chain-binding protein)	-1.3852	3.29451e-05
SF3A3_HUMAN	3	SF3A3 SAP61	Splicing factor 3A subunit 3 (SF3a60) (Spliceosome-associated protein 61) (SAP 61)	-1.39096	0.000220256
ROA2_HUMAN	17	HNRNPA2B1 HNRPA2B1	Heterogeneous nuclear ribonucleoproteins A2/B1 (hnRNP A2/B1)	-1.39648	0.00025552
PTBP1_HUMAN	8	PTBP1 PTB	Polypyrimidine tract-binding protein 1 (PTB) (57 kDa RNA-binding protein PPTB-1) (Heterogeneous nuclear ribonucleoprotein I) (hnRNP I)	-1.39677	1.11932e-08
GPX1_HUMAN	3	GPX1	Glutathione peroxidase 1 (GPx-1) (GSHPx-1) (EC 1.11.1.9) (Cellular glutathione peroxidase)	-1.40155	0.000172659
ARP2_HUMAN	9	ACTR2 ARP2	Actin-related protein 2 (Actin-like protein 2)	-1.40175	0.000108409
MLEC_HUMAN	5	MLEC KIAA0152	Malectin	-1.40188	2.77834e-07
XRCC5_HUMAN	14	XRCC5 G22P2	X-ray repair cross-complementing protein 5 (EC 3.6.4.-) (86 kDa subunit of Ku antigen) (ATP-dependent DNA helicase 2 subunit 2) (ATP-dependent DNA helicase II 80 kDa subunit) (CTC box-binding factor 85 kDa subunit) (CTC85) (CTCBF) (DNA repair protein XRCC5) (Ku80) (Ku86) (Lupus Ku autoantigen protein p86) (Nuclear factor IV) (Thyroid-lupus autoantigen) (TLAA) (X-ray repair complementing defective…	-1.40197	9.03685e-10
B2MG_HUMAN	3	B2M CDABP0092 HDCMA22P	Beta-2-microglobulin [Cleaved into: Beta-2-microglobulin form pI 5.3]	-1.4034	0.000286303
RL13_HUMAN	3	RPL13 BBC1 OK/SW-cl.46	60S ribosomal protein L13 (Breast basic conserved protein 1) (Large ribosomal subunit protein eL13)	-1.40436	0.00065079
SYQ_HUMAN	8	QARS	Glutamine--tRNA ligase (EC 6.1.1.18) (Glutaminyl-tRNA synthetase) (GlnRS)	-1.40447	7.97346e-08
DDX17_HUMAN	10	DDX17	Probable ATP-dependent RNA helicase DDX17 (EC 3.6.4.13) (DEAD box protein 17) (DEAD box protein p72) (DEAD box protein p82) (RNA-dependent helicase p72)	-1.40468	1.64737e-14
TPP1_HUMAN	4	TPP1 CLN2 GIG1 UNQ267/PRO304	Tripeptidyl-peptidase 1 (TPP-1) (EC 3.4.14.9) (Cell growth-inhibiting gene 1 protein) (Lysosomal pepstatin-insensitive protease) (LPIC) (Tripeptidyl aminopeptidase) (Tripeptidyl-peptidase I) (TPP-I)	-1.40711	4.0841e-05
HNRPM_HUMAN	17	HNRNPM HNRPM NAGR1	Heterogeneous nuclear ribonucleoprotein M (hnRNP M)	-1.40895	4.96504e-06
FUBP1_HUMAN	8	FUBP1	Far upstream element-binding protein 1 (FBP) (FUSE-binding protein 1) (DNA helicase V) (hDH V)	-1.4118	4.23243e-09
EFTU_HUMAN	11	TUFM	Elongation factor Tu, mitochondrial (EF-Tu) (P43)	-1.41219	1.95822e-07
SMD1_HUMAN	3	SNRPD1	Small nuclear ribonucleoprotein Sm D1 (Sm-D1) (Sm-D autoantigen) (snRNP core protein D1)	-1.41237	2.02201e-07
ILF2_HUMAN	10	ILF2 NF45 PRO3063	Interleukin enhancer-binding factor 2 (Nuclear factor of activated T-cells 45 kDa)	-1.41749	8.24162e-08
EWS_HUMAN	3	EWSR1 EWS	RNA-binding protein EWS (EWS oncogene) (Ewing sarcoma breakpoint region 1 protein)	-1.42257	0.000224885
DHX15_HUMAN	7	DHX15 DBP1 DDX15	Pre-mRNA-splicing factor ATP-dependent RNA helicase DHX15 (EC 3.6.4.13) (ATP-dependent RNA helicase #46) (DEAH box protein 15)	-1.42763	1.56734e-06
TMED9_HUMAN	4	TMED9 GP25L2	Transmembrane emp24 domain-containing protein 9 (GMP25) (Glycoprotein 25L2) (p24 family protein alpha-2) (p24alpha2) (p25)	-1.42932	0.000157506
RL7_HUMAN	11	RPL7	60S ribosomal protein L7 (Large ribosomal subunit protein uL30)	-1.42946	6.53875e-09
HDGF_HUMAN	4	HDGF HMG1L2	Hepatoma-derived growth factor (HDGF) (High mobility group protein 1-like 2) (HMG-1L2)	-1.43201	2.56846e-07
CATZ_HUMAN	3	CTSZ	Cathepsin Z (EC 3.4.18.1) (Cathepsin P) (Cathepsin X)	-1.43972	0.000363565
ARPC4_HUMAN	4	ARPC4 ARC20	Actin-related protein 2/3 complex subunit 4 (Arp2/3 complex 20 kDa subunit) (p20-ARC)	-1.44111	7.45387e-05
B3VL17_HUMAN	3			-1.44112	0.00195615
FRIH_HUMAN	7	FTH1 FTH FTHL6 OK/SW-cl.84 PIG15	Ferritin heavy chain (Ferritin H subunit) (EC 1.16.3.1) (Cell proliferation-inducing gene 15 protein) [Cleaved into: Ferritin heavy chain, N-terminally processed]	-1.44292	0.000177192
RBM25_HUMAN	3	RBM25 RNPC7	RNA-binding protein 25 (Arg/Glu/Asp-rich protein of 120 kDa) (RED120) (Protein S164) (RNA-binding motif protein 25) (RNA-binding region-containing protein 7)	-1.44295	0.00092603
FUBP2_HUMAN	12	KHSRP FUBP2	Far upstream element-binding protein 2 (FUSE-binding protein 2) (KH type-splicing regulatory protein) (KSRP) (p75)	-1.44633	1.07034e-08
SPTB2_HUMAN	76	SPTBN1 SPTB2	Spectrin beta chain, non-erythrocytic 1 (Beta-II spectrin) (Fodrin beta chain) (Spectrin, non-erythroid beta chain 1)	-1.44766	0.000417111
RPN1_HUMAN	19	RPN1	Dolichyl-diphosphooligosaccharide--protein glycosyltransferase subunit 1 (Dolichyl-diphosphooligosaccharide--protein glycosyltransferase 67 kDa subunit) (Ribophorin I) (RPN-I) (Ribophorin-1)	-1.44918	7.1667e-09
SPTN1_HUMAN	90	SPTAN1 NEAS SPTA2	Spectrin alpha chain, non-erythrocytic 1 (Alpha-II spectrin) (Fodrin alpha chain) (Spectrin, non-erythroid alpha subunit)	-1.44982	0.0228259
ANXA2_HUMAN	38	ANXA2 ANX2 ANX2L4 CAL1H LPC2D	Annexin A2 (Annexin II) (Annexin-2) (Calpactin I heavy chain) (Calpactin-1 heavy chain) (Chromobindin-8) (Lipocortin II) (Placental anticoagulant protein IV) (PAP-IV) (Protein I) (p36)	-1.45103	0.00413688
STT3A_HUMAN	6	STT3A ITM1 TMC	Dolichyl-diphosphooligosaccharide--protein glycosyltransferase subunit STT3A (Oligosaccharyl transferase subunit STT3A) (STT3-A) (EC 2.4.99.18) (B5) (Integral membrane protein 1) (Transmembrane protein TMC)	-1.45332	3.29451e-05
DPYL2_HUMAN	17	DPYSL2 CRMP2 ULIP2	Dihydropyrimidinase-related protein 2 (DRP-2) (Collapsin response mediator protein 2) (CRMP-2) (N2A3) (Unc-33-like phosphoprotein 2) (ULIP-2)	-1.46006	5.39381e-09
SF3B1_HUMAN	5	SF3B1 SAP155	Splicing factor 3B subunit 1 (Pre-mRNA-splicing factor SF3b 155 kDa subunit) (SF3b155) (Spliceosome-associated protein 155) (SAP 155)	-1.46293	1.30059e-05
SND1_HUMAN	18	SND1 TDRD11	Staphylococcal nuclease domain-containing protein 1 (EC 3.1.31.1) (100 kDa coactivator) (EBNA2 coactivator p100) (Tudor domain-containing protein 11) (p100 co-activator)	-1.46399	4.97898e-11
RS15A_HUMAN	3	RPS15A OK/SW-cl.82	40S ribosomal protein S15a (Small ribosomal subunit protein uS8)	-1.46445	0.000463882
RL12_HUMAN	3	RPL12	60S ribosomal protein L12 (Large ribosomal subunit protein uL11)	-1.46888	0.00155693
THAS_HUMAN	3	TBXAS1 CYP5 CYP5A1	Thromboxane-A synthase (TXA synthase) (TXS) (EC 5.3.99.5) (Cytochrome P450 5A1)	-1.47052	0.00153508
NNTM_HUMAN	11	NNT	NAD(P) transhydrogenase, mitochondrial (EC 7.1.1.1) (Nicotinamide nucleotide transhydrogenase) (Pyridine nucleotide transhydrogenase)	-1.47381	2.14809e-12
XRCC6_HUMAN	17	XRCC6 G22P1	X-ray repair cross-complementing protein 6 (EC 3.6.4.-) (EC 4.2.99.-) (5'-deoxyribose-5-phosphate lyase Ku70) (5'-dRP lyase Ku70) (70 kDa subunit of Ku antigen) (ATP-dependent DNA helicase 2 subunit 1) (ATP-dependent DNA helicase II 70 kDa subunit) (CTC box-binding factor 75 kDa subunit) (CTC75) (CTCBF) (DNA repair protein XRCC6) (Lupus Ku autoantigen protein p70) (Ku70) (Thyroid-lupus autoantige…	-1.47714	0.00284007
RBM14_HUMAN	5	RBM14 SIP	RNA-binding protein 14 (Paraspeckle protein 2) (PSP2) (RNA-binding motif protein 14) (RRM-containing coactivator activator/modulator) (Synaptotagmin-interacting protein) (SYT-interacting protein)	-1.48294	1.29939e-05
ETHE1_HUMAN	3	ETHE1 HSCO	Persulfide dioxygenase ETHE1, mitochondrial (EC 1.13.11.18) (Ethylmalonic encephalopathy protein 1) (Hepatoma subtracted clone one protein) (Sulfur dioxygenase ETHE1)	-1.48331	0.00215111
HNRPD_HUMAN	5	HNRNPD AUF1 HNRPD	Heterogeneous nuclear ribonucleoprotein D0 (hnRNP D0) (AU-rich element RNA-binding protein 1)	-1.48475	0.000234599
RL5_HUMAN	6	RPL5 MSTP030	60S ribosomal protein L5 (Large ribosomal subunit protein uL18)	-1.48827	3.89664e-05
HBD_HUMAN	4	HBD	Hemoglobin subunit delta (Delta-globin) (Hemoglobin delta chain)	-1.48985	3.03601e-08
RS14_HUMAN	4	RPS14 PRO2640	40S ribosomal protein S14 (Small ribosomal subunit protein uS11)	-1.4906	4.87493e-06
CNDP2_HUMAN	7	CNDP2 CN2 CPGL HEL-S-13 PEPA	Cytosolic non-specific dipeptidase (EC 3.4.13.18) (CNDP dipeptidase 2) (Carnosine dipeptidase II) (Epididymis secretory protein Li 13) (Glutamate carboxypeptidase-like protein 1) (Peptidase A)	-1.49239	9.59524e-08
LMAN2_HUMAN	7	LMAN2 C5orf8	Vesicular integral-membrane protein VIP36 (Glycoprotein GP36b) (Lectin mannose-binding 2) (Vesicular integral-membrane protein 36) (VIP36)	-1.49259	4.81129e-07
CAH1_HUMAN	11	CA1	Carbonic anhydrase 1 (EC 4.2.1.1) (Carbonate dehydratase I) (Carbonic anhydrase B) (CAB) (Carbonic anhydrase I) (CA-I)	-1.49439	7.89542e-07
AMPB_HUMAN	6	RNPEP APB	Aminopeptidase B (AP-B) (EC 3.4.11.6) (Arginine aminopeptidase) (Arginyl aminopeptidase)	-1.49569	5.58088e-06
HPT_HUMAN	14	HP	Haptoglobin (Zonulin) [Cleaved into: Haptoglobin alpha chain; Haptoglobin beta chain]	-1.4974	8.72002e-07
ALDH2_HUMAN	21	ALDH2 ALDM	Aldehyde dehydrogenase, mitochondrial (EC 1.2.1.3) (ALDH class 2) (ALDH-E2) (ALDHI)	-1.49957	0.000157506
RS5_HUMAN	3	RPS5	40S ribosomal protein S5 (Small ribosomal subunit protein uS7) [Cleaved into: 40S ribosomal protein S5, N-terminally processed]	-1.50015	3.85384e-05
K7EPT8_HUMAN	4	GFAP	Glial fibrillary acidic protein (Fragment)	-1.50092	0.00880181
HYOU1_HUMAN	9	HYOU1 GRP170 ORP150	Hypoxia up-regulated protein 1 (150 kDa oxygen-regulated protein) (ORP-150) (170 kDa glucose-regulated protein) (GRP-170)	-1.504	2.04698e-07
RS25_HUMAN	5	RPS25	40S ribosomal protein S25 (Small ribosomal subunit protein eS25)	-1.51018	5.97781e-06
CATG_HUMAN	7	CTSG	Cathepsin G (CG) (EC 3.4.21.20)	-1.51064	1.24558e-05
H2B1B_HUMAN	12	HIST1H2BB H2BFF	Histone H2B type 1-B (Histone H2B.1) (Histone H2B.f) (H2B/f)	-1.51231	0.00029376
THIL_HUMAN	10	ACAT1 ACAT MAT	Acetyl-CoA acetyltransferase, mitochondrial (EC 2.3.1.9) (Acetoacetyl-CoA thiolase) (T2)	-1.51701	0.000575485
CYC_HUMAN	4	CYCS CYC	Cytochrome c	-1.51721	3.89211e-05
SBP1_HUMAN	20	SELENBP1 SBP	Methanethiol oxidase (MTO) (EC 1.8.3.4) (56 kDa selenium-binding protein) (SBP56) (SP56) (Selenium-binding protein 1)	-1.52384	4.82338e-05
MDHM_HUMAN	10	MDH2	Malate dehydrogenase, mitochondrial (EC 1.1.1.37)	-1.52597	3.7133e-11
HACD3_HUMAN	3	HACD3 BIND1 PTPLAD1	Very-long-chain (3R)-3-hydroxyacyl-CoA dehydratase 3 (EC 4.2.1.134) (3-hydroxyacyl-CoA dehydratase 3) (HACD3) (Butyrate-induced protein 1) (B-ind1) (hB-ind1) (Protein-tyrosine phosphatase-like A domain-containing protein 1)	-1.53002	0.000119634
RL4_HUMAN	9	RPL4 RPL1	60S ribosomal protein L4 (60S ribosomal protein L1) (Large ribosomal subunit protein uL4)	-1.53111	6.41498e-10
TALDO_HUMAN	10	TALDO1 TAL TALDO TALDOR	Transaldolase (EC 2.2.1.2)	-1.53893	4.53591e-07
PDIA1_HUMAN	24	P4HB ERBA2L PDI PDIA1 PO4DB	Protein disulfide-isomerase (PDI) (EC 5.3.4.1) (Cellular thyroid hormone-binding protein) (Prolyl 4-hydroxylase subunit beta) (p55)	-1.5405	7.71323e-06
SRP68_HUMAN	3	SRP68	Signal recognition particle subunit SRP68 (SRP68) (Signal recognition particle 68 kDa protein)	-1.54287	0.000247706
DHRS7_HUMAN	3	DHRS7 DHRS7A RETSDR4 SDR34C1 CGI-86 UNQ285/PRO3448	Dehydrogenase/reductase SDR family member 7 (EC 1.1.-.-) (Retinal short-chain dehydrogenase/reductase 4) (retSDR4) (Short chain dehydrogenase/reductase family 34C member 1)	-1.55187	0.00127275
HMOX1_HUMAN	4	HMOX1 HO HO1	Heme oxygenase 1 (HO-1) (EC 1.14.14.18)	-1.55247	0.000310037
A0A024QZB4_HUMAN	3			-1.55599	0.00033189
AL3A2_HUMAN	7	ALDH3A2 ALDH10 FALDH	Fatty aldehyde dehydrogenase (EC 1.2.1.3) (Aldehyde dehydrogenase 10) (Aldehyde dehydrogenase family 3 member A2) (Microsomal aldehyde dehydrogenase)	-1.55826	7.97041e-09
K2C75_HUMAN	5	KRT75 K6HF KB18	Keratin, type II cytoskeletal 75 (Cytokeratin-75) (CK-75) (Keratin-6 hair follicle) (hK6hf) (Keratin-75) (K75) (Type II keratin-K6hf) (Type-II keratin Kb18)	-1.55841	1.8019e-06
OSTF1_HUMAN	3	OSTF1	Osteoclast-stimulating factor 1	-1.56051	5.72564e-05
COPE_HUMAN	4	COPE	Coatomer subunit epsilon (Epsilon-coat protein) (Epsilon-COP)	-1.56397	1.55894e-05
2B1B_HUMAN	6	HLA-DRB1	HLA class II histocompatibility antigen, DRB1-11 beta chain (DR-5) (DR5) (DRw11) (MHC class II antigen DRB1*11)	-1.56866	0.0357637
RS9_HUMAN	15	RPS9	40S ribosomal protein S9 (Small ribosomal subunit protein uS4)	-1.57288	1.99623e-10
DHX9_HUMAN	13	DHX9 DDX9 LKP NDH2	ATP-dependent RNA helicase A (EC 3.6.4.13) (DEAH box protein 9) (DExH-box helicase 9) (Leukophysin) (LKP) (Nuclear DNA helicase II) (NDH II) (RNA helicase A)	-1.57297	9.87017e-10
IVD_HUMAN	6	IVD	Isovaleryl-CoA dehydrogenase, mitochondrial (IVD) (EC 1.3.8.4)	-1.57421	4.86773e-06
DHE3_HUMAN	6	GLUD1 GLUD	Glutamate dehydrogenase 1, mitochondrial (GDH 1) (EC 1.4.1.3)	-1.57905	8.53078e-09
B7Z5V6_HUMAN	3			-1.58241	0.000103024
SAMH1_HUMAN	21	SAMHD1 MOP5	Deoxynucleoside triphosphate triphosphohydrolase SAMHD1 (dNTPase) (EC 3.1.5.-) (Dendritic cell-derived IFNG-induced protein) (DCIP) (Monocyte protein 5) (MOP-5) (SAM domain and HD domain-containing protein 1) (hSAMHD1)	-1.58425	1.64737e-14
TMEDA_HUMAN	7	TMED10 TMP21	Transmembrane emp24 domain-containing protein 10 (21 kDa transmembrane-trafficking protein) (S31III125) (S31I125) (Tmp-21-I) (Transmembrane protein Tmp21) (p23) (p24 family protein delta-1) (p24delta1) (p24delta)	-1.58618	1.42746e-06
S10AA_HUMAN	5	S100A10 ANX2LG CAL1L CLP11	Protein S100-A10 (Calpactin I light chain) (Calpactin-1 light chain) (Cellular ligand of annexin II) (S100 calcium-binding protein A10) (p10 protein) (p11)	-1.5872	8.52722e-07
PDIA6_HUMAN	12	PDIA6 ERP5 P5 TXNDC7	Protein disulfide-isomerase A6 (EC 5.3.4.1) (Endoplasmic reticulum protein 5) (ER protein 5) (ERp5) (Protein disulfide isomerase P5) (Thioredoxin domain-containing protein 7)	-1.59612	8.25769e-06
CYTB_HUMAN	4	CSTB CST6 STFB	Cystatin-B (CPI-B) (Liver thiol proteinase inhibitor) (Stefin-B)	-1.5966	1.17357e-05
AMPL_HUMAN	10	LAP3 LAPEP PEPS	Cytosol aminopeptidase (EC 3.4.11.1) (Leucine aminopeptidase 3) (LAP-3) (Leucyl aminopeptidase) (Peptidase S) (Proline aminopeptidase) (EC 3.4.11.5) (Prolyl aminopeptidase)	-1.61018	4.31518e-08
AP1G1_HUMAN	6	AP1G1 ADTG CLAPG1	AP-1 complex subunit gamma-1 (Adaptor protein complex AP-1 subunit gamma-1) (Adaptor-related protein complex 1 subunit gamma-1) (Clathrin assembly protein complex 1 gamma-1 large chain) (Gamma1-adaptin) (Golgi adaptor HA1/AP1 adaptin subunit gamma-1)	-1.61946	8.46737e-08
EIF3L_HUMAN	7	EIF3L EIF3EIP EIF3S6IP HSPC021 HSPC025 MSTP005	Eukaryotic translation initiation factor 3 subunit L (eIF3l) (Eukaryotic translation initiation factor 3 subunit 6-interacting protein) (Eukaryotic translation initiation factor 3 subunit E-interacting protein)	-1.62039	1.76245e-08
LMAN1_HUMAN	9	LMAN1 ERGIC53 F5F8D	Protein ERGIC-53 (ER-Golgi intermediate compartment 53 kDa protein) (Gp58) (Intracellular mannose-specific lectin MR60) (Lectin mannose-binding 1)	-1.62351	1.71623e-06
SSRD_HUMAN	3	SSR4 TRAPD	Translocon-associated protein subunit delta (TRAP-delta) (Signal sequence receptor subunit delta) (SSR-delta)	-1.62625	0.000264454
COX2_HUMAN	7	MT-CO2 COII COX2 COXII MTCO2	Cytochrome c oxidase subunit 2 (Cytochrome c oxidase polypeptide II)	-1.62963	5.21705e-09
KRT34_HUMAN	4	KRT34 HHA4 HKA4 KRTHA4	Keratin, type I cuticular Ha4 (Hair keratin, type I Ha4) (Keratin-34) (K34)	-1.63046	8.5303e-07
EMC2_HUMAN	3	EMC2 KIAA0103 TTC35	ER membrane protein complex subunit 2 (Tetratricopeptide repeat protein 35) (TPR repeat protein 35)	-1.63147	7.84303e-06
IPYR_HUMAN	6	PPA1 IOPPP PP	Inorganic pyrophosphatase (EC 3.6.1.1) (Pyrophosphate phospho-hydrolase) (PPase)	-1.63997	4.94844e-07
HNRPL_HUMAN	7	HNRNPL HNRPL P/OKcl.14	Heterogeneous nuclear ribonucleoprotein L (hnRNP L)	-1.64027	1.48478e-09
TPPP3_HUMAN	3	TPPP3 CGI-38	Tubulin polymerization-promoting protein family member 3 (TPPP/p20)	-1.64561	7.86877e-05
RBMX_HUMAN	10	RBMX HNRPG RBMXP1	RNA-binding motif protein, X chromosome (Glycoprotein p43) (Heterogeneous nuclear ribonucleoprotein G) (hnRNP G) [Cleaved into: RNA-binding motif protein, X chromosome, N-terminally processed]	-1.64787	9.94365e-10
ROA1_HUMAN	14	HNRNPA1 HNRPA1	Heterogeneous nuclear ribonucleoprotein A1 (hnRNP A1) (Helix-destabilizing protein) (Single-strand RNA-binding protein) (hnRNP core protein A1) [Cleaved into: Heterogeneous nuclear ribonucleoprotein A1, N-terminally processed]	-1.65033	5.84353e-08
DECR_HUMAN	4	DECR1 DECR SDR18C1	2,4-dienoyl-CoA reductase, mitochondrial (EC 1.3.1.34) (2,4-dienoyl-CoA reductase [NADPH]) (4-enoyl-CoA reductase [NADPH]) (Short chain dehydrogenase/reductase family 18C member 1)	-1.65905	1.41738e-05
CAZA1_HUMAN	7	CAPZA1	F-actin-capping protein subunit alpha-1 (CapZ alpha-1)	-1.65992	5.3024e-11
PDIA4_HUMAN	15	PDIA4 ERP70 ERP72	Protein disulfide-isomerase A4 (EC 5.3.4.1) (Endoplasmic reticulum resident protein 70) (ER protein 70) (ERp70) (Endoplasmic reticulum resident protein 72) (ER protein 72) (ERp-72) (ERp72)	-1.68676	6.43145e-11
ACSS3_HUMAN	3	ACSS3	Acyl-CoA synthetase short-chain family member 3, mitochondrial (EC 6.2.1.1) (Acyl-CoA synthetase short-chain family member 3)	-1.70162	5.3417e-05
ANM1_HUMAN	6	PRMT1 HMT2 HRMT1L2 IR1B4	Protein arginine N-methyltransferase 1 (EC 2.1.1.319) (Histone-arginine N-methyltransferase PRMT1) (Interferon receptor 1-bound protein 4)	-1.70224	2.14592e-06
CATD_HUMAN	14	CTSD CPSD	Cathepsin D (EC 3.4.23.5) [Cleaved into: Cathepsin D light chain; Cathepsin D heavy chain]	-1.71528	2.54185e-05
A0A024QZZ7_HUMAN	5			-1.71914	0.000343117
DDX5_HUMAN	6	DDX5 G17P1 HELR HLR1	Probable ATP-dependent RNA helicase DDX5 (EC 3.6.4.13) (DEAD box protein 5) (RNA helicase p68)	-1.72204	5.12506e-09
FA49B_HUMAN	4	FAM49B BM-009	Protein FAM49B (L1)	-1.72357	1.47437e-05
LYAG_HUMAN	3	GAA	Lysosomal alpha-glucosidase (EC 3.2.1.20) (Acid maltase) (Aglucosidase alfa) [Cleaved into: 76 kDa lysosomal alpha-glucosidase; 70 kDa lysosomal alpha-glucosidase]	-1.72597	0.00029376
RS10_HUMAN	5	RPS10	40S ribosomal protein S10 (Small ribosomal subunit protein eS10)	-1.72686	2.65e-08
COX41_HUMAN	4	COX4I1 COX4	Cytochrome c oxidase subunit 4 isoform 1, mitochondrial (Cytochrome c oxidase polypeptide IV) (Cytochrome c oxidase subunit IV isoform 1) (COX IV-1)	-1.7304	4.4372e-05
H2A1B_HUMAN	6	HIST1H2AB H2AFM; HIST1H2AE H2AFA	Histone H2A type 1-B/E (Histone H2A.2) (Histone H2A/a) (Histone H2A/m)	-1.73377	1.42388e-07
ETFB_HUMAN	5	ETFB FP585	Electron transfer flavoprotein subunit beta (Beta-ETF)	-1.73485	6.76614e-09
MCCA_HUMAN	4	MCCC1 MCCA	Methylcrotonoyl-CoA carboxylase subunit alpha, mitochondrial (MCCase subunit alpha) (EC 6.4.1.4) (3-methylcrotonyl-CoA carboxylase 1) (3-methylcrotonyl-CoA carboxylase biotin-containing subunit) (3-methylcrotonyl-CoA:carbon dioxide ligase subunit alpha)	-1.73501	9.07769e-06
COPA_HUMAN	18	COPA	Coatomer subunit alpha (Alpha-coat protein) (Alpha-COP) (HEP-COP) (HEPCOP) [Cleaved into: Xenin (Xenopsin-related peptide); Proxenin]	-1.73957	1.64737e-14
COX5A_HUMAN	4	COX5A	Cytochrome c oxidase subunit 5A, mitochondrial (Cytochrome c oxidase polypeptide Va)	-1.74744	2.76282e-08
MVP_HUMAN	28	MVP LRP	Major vault protein (MVP) (Lung resistance-related protein)	-1.74975	6.89224e-07
NIBL1_HUMAN	7	FAM129B C9orf88	Niban-like protein 1 (Meg-3) (Melanoma invasion by ERK) (MINERVA) (Protein FAM129B)	-1.75028	4.84356e-08
URP2_HUMAN	5	FERMT3 KIND3 MIG2B URP2	Fermitin family homolog 3 (Kindlin-3) (MIG2-like protein) (Unc-112-related protein 2)	-1.75426	1.29029e-07
AATM_HUMAN	9	GOT2	Aspartate aminotransferase, mitochondrial (mAspAT) (EC 2.6.1.1) (EC 2.6.1.7) (Fatty acid-binding protein) (FABP-1) (Glutamate oxaloacetate transaminase 2) (Kynurenine aminotransferase 4) (Kynurenine aminotransferase IV) (Kynurenine--oxoglutarate transaminase 4) (Kynurenine--oxoglutarate transaminase IV) (Plasma membrane-associated fatty acid-binding protein) (FABPpm) (Transaminase A)	-1.76504	7.54472e-12
PSB8_HUMAN	3	PSMB8 LMP7 PSMB5i RING10 Y2	Proteasome subunit beta type-8 (EC 3.4.25.1) (Low molecular mass protein 7) (Macropain subunit C13) (Multicatalytic endopeptidase complex subunit C13) (Proteasome component C13) (Proteasome subunit beta-5i) (Really interesting new gene 10 protein)	-1.76519	4.4304e-06
ETFA_HUMAN	5	ETFA	Electron transfer flavoprotein subunit alpha, mitochondrial (Alpha-ETF)	-1.76675	1.27705e-08
ERP29_HUMAN	5	ERP29 C12orf8 ERP28	Endoplasmic reticulum resident protein 29 (ERp29) (Endoplasmic reticulum resident protein 28) (ERp28) (Endoplasmic reticulum resident protein 31) (ERp31)	-1.77105	8.24162e-08
CH60_HUMAN	13	HSPD1 HSP60	60 kDa heat shock protein, mitochondrial (EC 5.6.1.7) (60 kDa chaperonin) (Chaperonin 60) (CPN60) (Heat shock protein 60) (HSP-60) (Hsp60) (HuCHA60) (Mitochondrial matrix protein P1) (P60 lymphocyte protein)	-1.77437	7.12446e-10
APMAP_HUMAN	10	APMAP C20orf3 UNQ1869/PRO4305	Adipocyte plasma membrane-associated protein (Protein BSCv)	-1.77632	2.4838e-10
DPP4_HUMAN	4	DPP4 ADCP2 CD26	Dipeptidyl peptidase 4 (EC 3.4.14.5) (ADABP) (Adenosine deaminase complexing protein 2) (ADCP-2) (Dipeptidyl peptidase IV) (DPP IV) (T-cell activation antigen CD26) (TP103) (CD antigen CD26) [Cleaved into: Dipeptidyl peptidase 4 membrane form (Dipeptidyl peptidase IV membrane form); Dipeptidyl peptidase 4 soluble form (Dipeptidyl peptidase IV soluble form)]	-1.7786	0.000298836
AT1A1_HUMAN	15	ATP1A1	Sodium/potassium-transporting ATPase subunit alpha-1 (Na(+)/K(+) ATPase alpha-1 subunit) (EC 7.2.2.13) (Sodium pump subunit alpha-1)	-1.78096	0.0186274
PCKGM_HUMAN	6	PCK2 PEPCK2	Phosphoenolpyruvate carboxykinase [GTP], mitochondrial (PEPCK-M) (EC 4.1.1.32)	-1.7843	1.61075e-06
STX12_HUMAN	3	STX12	Syntaxin-12	-1.78581	1.15932e-06
IF4A1_HUMAN	10	EIF4A1 DDX2A EIF4A	Eukaryotic initiation factor 4A-I (eIF-4A-I) (eIF4A-I) (EC 3.6.4.13) (ATP-dependent RNA helicase eIF4A-1)	-1.78604	0.00177221
CATS_HUMAN	3	CTSS	Cathepsin S (EC 3.4.22.27)	-1.78814	2.37923e-06
DRA_HUMAN	4	HLA-DRA HLA-DRA1	HLA class II histocompatibility antigen, DR alpha chain (MHC class II antigen DRA)	-1.79644	0.000108446
LONM_HUMAN	3	LONP1 PRSS15	Lon protease homolog, mitochondrial (EC 3.4.21.53) (LONHs) (Lon protease-like protein) (LONP) (Mitochondrial ATP-dependent protease Lon) (Serine protease 15)	-1.80006	3.34825e-05
GRP75_HUMAN	14	HSPA9 GRP75 HSPA9B mt-HSP70	Stress-70 protein, mitochondrial (75 kDa glucose-regulated protein) (GRP-75) (Heat shock 70 kDa protein 9) (Mortalin) (MOT) (Peptide-binding protein 74) (PBP74)	-1.80234	9.90245e-10
AOFA_HUMAN	13	MAOA	Amine oxidase [flavin-containing] A (EC 1.4.3.4) (Monoamine oxidase type A) (MAO-A)	-1.80569	2.00445e-11
ACBP_HUMAN	4	DBI	Acyl-CoA-binding protein (ACBP) (Diazepam-binding inhibitor) (DBI) (Endozepine) (EP)	-1.80792	7.02681e-06
VATA_HUMAN	8	ATP6V1A ATP6A1 ATP6V1A1 VPP2	V-type proton ATPase catalytic subunit A (V-ATPase subunit A) (EC 7.1.2.2) (V-ATPase 69 kDa subunit) (Vacuolar ATPase isoform VA68) (Vacuolar proton pump subunit alpha)	-1.80911	1.04355e-09
HNRL2_HUMAN	6	HNRNPUL2 HNRPUL2	Heterogeneous nuclear ribonucleoprotein U-like protein 2 (Scaffold-attachment factor A2) (SAF-A2)	-1.81286	1.04235e-06
GPDM_HUMAN	4	GPD2	Glycerol-3-phosphate dehydrogenase, mitochondrial (GPD-M) (GPDH-M) (EC 1.1.5.3) (mtGPD)	-1.82001	8.61054e-08
CATB_HUMAN	4	CTSB CPSB	Cathepsin B (EC 3.4.22.1) (APP secretase) (APPS) (Cathepsin B1) [Cleaved into: Cathepsin B light chain; Cathepsin B heavy chain]	-1.823	9.40123e-10
LKHA4_HUMAN	19	LTA4H LTA4	Leukotriene A-4 hydrolase (LTA-4 hydrolase) (EC 3.3.2.6) (Leukotriene A(4) hydrolase)	-1.83136	4.90207e-12
COPB2_HUMAN	5	COPB2	Coatomer subunit beta' (Beta'-coat protein) (Beta'-COP) (p102)	-1.83643	9.05116e-09
2B1F_HUMAN	3	HLA-DRB1 HLA-DRB2	HLA class II histocompatibility antigen, DRB1-15 beta chain (DW2.2/DR2.2) (MHC class II antigen DRB1*15)	-1.84486	1.74227e-06
GTF2I_HUMAN	3	GTF2I BAP135 WBSCR6	General transcription factor II-I (GTFII-I) (TFII-I) (Bruton tyrosine kinase-associated protein 135) (BAP-135) (BTK-associated protein 135) (SRF-Phox1-interacting protein) (SPIN) (Williams-Beuren syndrome chromosomal region 6 protein)	-1.84541	5.97781e-06
H2AY_HUMAN	9	H2AFY MACROH2A1	Core histone macro-H2A.1 (Histone macroH2A1) (mH2A1) (Histone H2A.y) (H2A/y) (Medulloblastoma antigen MU-MB-50.205)	-1.8485	2.56956e-14
H12_HUMAN	12	HIST1H1C H1F2	Histone H1.2 (Histone H1c) (Histone H1d) (Histone H1s-1)	-1.85733	6.51947e-06
A0A087WUI4_HUMAN	6	TPSB2	Tryptase beta-2	-1.86524	2.00816e-06
ACSL1_HUMAN	6	ACSL1 FACL1 FACL2 LACS LACS1 LACS2	Long-chain-fatty-acid--CoA ligase 1 (EC 6.2.1.3) (Acyl-CoA synthetase 1) (ACS1) (Long-chain acyl-CoA synthetase 1) (LACS 1) (Long-chain acyl-CoA synthetase 2) (LACS 2) (Long-chain fatty acid-CoA ligase 2) (Palmitoyl-CoA ligase 1) (Palmitoyl-CoA ligase 2)	-1.86835	5.29155e-10
SPTB1_HUMAN	7	SPTB SPTB1	Spectrin beta chain, erythrocytic (Beta-I spectrin)	-1.87362	4.91298e-07
CORO7_HUMAN	3	CORO7	Coronin-7 (Crn7) (70 kDa WD repeat tumor rejection antigen homolog)	-1.87636	9.85472e-05
TKT_HUMAN	17	TKT	Transketolase (TK) (EC 2.2.1.1)	-1.87941	1.07353e-05
PAPS2_HUMAN	7	PAPSS2 ATPSK2	Bifunctional 3'-phosphoadenosine 5'-phosphosulfate synthase 2 (PAPS synthase 2) (PAPSS 2) (Sulfurylase kinase 2) (SK 2) (SK2) [Includes: Sulfate adenylyltransferase (EC 2.7.7.4) (ATP-sulfurylase) (Sulfate adenylate transferase) (SAT); Adenylyl-sulfate kinase (EC 2.7.1.25) (3'-phosphoadenosine-5'-phosphosulfate synthase) (APS kinase) (Adenosine-5'-phosphosulfate 3'-phosphotransferase) (Adenylylsul…	-1.88785	2.40814e-09
DQB1_HUMAN	5	HLA-DQB1 HLA-DQB	HLA class II histocompatibility antigen, DQ beta 1 chain (MHC class II antigen DQB1)	-1.89178	0.00811247
CTND1_HUMAN	9	CTNND1 KIAA0384	Catenin delta-1 (Cadherin-associated Src substrate) (CAS) (p120 catenin) (p120(ctn)) (p120(cas))	-1.90724	3.85026e-13
AGR3_HUMAN	3	AGR3 BCMP11 PDIA18 UNQ642/PRO1272	Anterior gradient protein 3 (AG-3) (AG3) (hAG-3) (Anterior gradient 3 homolog) (Breast cancer membrane protein 11) (Protein disulfide isomerase family A, member 18)	-1.91372	0.000200783
TIF1B_HUMAN	8	TRIM28 KAP1 RNF96 TIF1B	Transcription intermediary factor 1-beta (TIF1-beta) (E3 SUMO-protein ligase TRIM28) (EC 2.3.2.27) (KRAB-associated protein 1) (KAP-1) (KRAB-interacting protein 1) (KRIP-1) (Nuclear corepressor KAP-1) (RING finger protein 96) (RING-type E3 ubiquitin transferase TIF1-beta) (Tripartite motif-containing protein 28)	-1.91442	1.06015e-08
SUMF2_HUMAN	3	SUMF2 PSEC0171 UNQ1968/PRO4500	Inactive C-alpha-formylglycine-generating enzyme 2 (Paralog of formylglycine-generating enzyme) (pFGE) (Sulfatase-modifying factor 2)	-1.91745	6.02588e-07
NCLN_HUMAN	4	NCLN	Nicalin (Nicastrin-like protein)	-1.91795	9.11941e-07
MRC1_HUMAN	8	MRC1 CLEC13D CLEC13DL MRC1L1	Macrophage mannose receptor 1 (MMR) (C-type lectin domain family 13 member D) (C-type lectin domain family 13 member D-like) (Human mannose receptor) (hMR) (Macrophage mannose receptor 1-like protein 1) (CD antigen CD206)	-1.92101	2.21838e-09
B3AT_HUMAN	7	SLC4A1 AE1 DI EPB3	Band 3 anion transport protein (Anion exchange protein 1) (AE 1) (Anion exchanger 1) (Solute carrier family 4 member 1) (CD antigen CD233)	-1.92367	2.95523e-06
GDIR2_HUMAN	5	ARHGDIB GDIA2 GDID4 RAP1GN1	Rho GDP-dissociation inhibitor 2 (Rho GDI 2) (Ly-GDI) (Rho-GDI beta)	-1.9313	7.94433e-07
GRAN_HUMAN	4	GCA GCL	Grancalcin	-1.93258	1.00402e-06
HNRPU_HUMAN	14	HNRNPU C1orf199 HNRPU SAFA U21.1	Heterogeneous nuclear ribonucleoprotein U (hnRNP U) (GRIP120) (Nuclear p120 ribonucleoprotein) (Scaffold-attachment factor A) (SAF-A) (p120) (pp120)	-1.94069	0.00182439
CTNB1_HUMAN	7	CTNNB1 CTNNB OK/SW-cl.35 PRO2286	Catenin beta-1 (Beta-catenin)	-1.94611	2.1047e-10
EZRI_HUMAN	16	EZR VIL2	Ezrin (Cytovillin) (Villin-2) (p81)	-1.9558	1.64737e-14
HCLS1_HUMAN	3	HCLS1 HS1	Hematopoietic lineage cell-specific protein (Hematopoietic cell-specific LYN substrate 1) (LckBP1) (p75)	-1.96717	6.95126e-05
ILEU_HUMAN	13	SERPINB1 ELANH2 MNEI PI2	Leukocyte elastase inhibitor (LEI) (Monocyte/neutrophil elastase inhibitor) (EI) (M/NEI) (Peptidase inhibitor 2) (PI-2) (Serpin B1)	-1.96856	1.28962e-12
ACE_HUMAN	3	ACE DCP DCP1	Angiotensin-converting enzyme (ACE) (EC 3.2.1.-) (EC 3.4.15.1) (Dipeptidyl carboxypeptidase I) (Kininase II) (CD antigen CD143) [Cleaved into: Angiotensin-converting enzyme, soluble form]	-1.97345	4.64577e-05
RMD3_HUMAN	4	RMDN3 FAM82A2 FAM82C PTPIP51 hucep-10 UNQ3122/PRO10274	Regulator of microtubule dynamics protein 3 (RMD-3) (hRMD-3) (Cerebral protein 10) (Protein FAM82A2) (Protein FAM82C) (Protein tyrosine phosphatase-interacting protein 51) (TCPTP-interacting protein 51)	-1.98227	3.32132e-07
CD44_HUMAN	4	CD44 LHR MDU2 MDU3 MIC4	CD44 antigen (CDw44) (Epican) (Extracellular matrix receptor III) (ECMR-III) (GP90 lymphocyte homing/adhesion receptor) (HUTCH-I) (Heparan sulfate proteoglycan) (Hermes antigen) (Hyaluronate receptor) (Phagocytic glycoprotein 1) (PGP-1) (Phagocytic glycoprotein I) (PGP-I) (CD antigen CD44)	-1.98717	3.28676e-07
CPT2_HUMAN	4	CPT2 CPT1	Carnitine O-palmitoyltransferase 2, mitochondrial (EC 2.3.1.21) (Carnitine palmitoyltransferase II) (CPT II)	-1.99854	9.83093e-07
ASAH1_HUMAN	10	ASAH1 ASAH HSD-33 HSD33	Acid ceramidase (AC) (ACDase) (Acid CDase) (EC 3.5.1.23) (Acylsphingosine deacylase) (N-acylethanolamine hydrolase ASAH1) (EC 3.5.1.-) (N-acylsphingosine amidohydrolase) (Putative 32 kDa heart protein) (PHP32) [Cleaved into: Acid ceramidase subunit alpha; Acid ceramidase subunit beta]	-2.00685	1.8e-14
6PGD_HUMAN	8	PGD PGDH	6-phosphogluconate dehydrogenase, decarboxylating (EC 1.1.1.44)	-2.00856	3.99351e-10
RL27A_HUMAN	3	RPL27A	60S ribosomal protein L27a (Large ribosomal subunit protein uL15)	-2.03535	4.51415e-06
PML_HUMAN	12	PML MYL PP8675 RNF71 TRIM19	Protein PML (Promyelocytic leukemia protein) (RING finger protein 71) (Tripartite motif-containing protein 19)	-2.03701	1.25515e-13
FABP5_HUMAN	4	FABP5	Fatty acid-binding protein 5 (Epidermal-type fatty acid-binding protein) (E-FABP) (Fatty acid-binding protein, epidermal) (Psoriasis-associated fatty acid-binding protein homolog) (PA-FABP)	-2.03946	7.02681e-06
PECA1_HUMAN	7	PECAM1	Platelet endothelial cell adhesion molecule (PECAM-1) (EndoCAM) (GPIIA') (PECA1) (CD antigen CD31)	-2.04325	1.18524e-09
RRBP1_HUMAN	21	RRBP1 KIAA1398	Ribosome-binding protein 1 (180 kDa ribosome receptor homolog) (RRp) (ES/130-related protein) (Ribosome receptor protein)	-2.04858	1.64737e-14
AT1B1_HUMAN	3	ATP1B1 ATP1B	Sodium/potassium-transporting ATPase subunit beta-1 (Sodium/potassium-dependent ATPase subunit beta-1)	-2.05897	1.1198e-05
PRDX5_HUMAN	6	PRDX5 ACR1 SBBI10	Peroxiredoxin-5, mitochondrial (EC 1.11.1.15) (Alu corepressor 1) (Antioxidant enzyme B166) (AOEB166) (Liver tissue 2D-page spot 71B) (PLP) (Peroxiredoxin V) (Prx-V) (Peroxisomal antioxidant enzyme) (TPx type VI) (Thioredoxin peroxidase PMP20)	-2.08034	1.01483e-06
LRC59_HUMAN	3	LRRC59 PRO1855	Leucine-rich repeat-containing protein 59 (Ribosome-binding protein p34) (p34) [Cleaved into: Leucine-rich repeat-containing protein 59, N-terminally processed]	-2.08212	4.4372e-05
PEPL_HUMAN	16	PPL KIAA0568	Periplakin (190 kDa paraneoplastic pemphigus antigen) (195 kDa cornified envelope precursor protein)	-2.11772	2.34382e-14
HS12B_HUMAN	10	HSPA12B C20orf60	Heat shock 70 kDa protein 12B	-2.12261	2.07222e-13
DCXR_HUMAN	3	DCXR SDR20C1	L-xylulose reductase (XR) (EC 1.1.1.10) (Carbonyl reductase II) (Dicarbonyl/L-xylulose reductase) (Kidney dicarbonyl reductase) (kiDCR) (Short chain dehydrogenase/reductase family 20C member 1) (Sperm surface protein P34H)	-2.13948	3.63468e-09
ADT2_HUMAN	3	SLC25A5 ANT2	ADP/ATP translocase 2 (ADP,ATP carrier protein 2) (ADP,ATP carrier protein, fibroblast isoform) (Adenine nucleotide translocator 2) (ANT 2) (Solute carrier family 25 member 5) [Cleaved into: ADP/ATP translocase 2, N-terminally processed]	-2.14069	2.97143e-06
NCPR_HUMAN	14	POR CYPOR	NADPH--cytochrome P450 reductase (CPR) (P450R) (EC 1.6.2.4)	-2.16465	1.13118e-13
PTPRC_HUMAN	5	PTPRC CD45	Receptor-type tyrosine-protein phosphatase C (EC 3.1.3.48) (Leukocyte common antigen) (L-CA) (T200) (CD antigen CD45)	-2.17891	3.1479e-09
CATA_HUMAN	18	CAT	Catalase (EC 1.11.1.6)	-2.19944	2.38836e-13
H15_HUMAN	6	HIST1H1B H1F5	Histone H1.5 (Histone H1a) (Histone H1b) (Histone H1s-3)	-2.20212	2.80204e-10
LAP2A_HUMAN	3	TMPO LAP2	Lamina-associated polypeptide 2, isoform alpha (Thymopoietin isoform alpha) (TP alpha) (Thymopoietin-related peptide isoform alpha) (TPRP isoform alpha) [Cleaved into: Thymopoietin (TP) (Splenin); Thymopentin (TP5)]	-2.20597	1.11191e-06
COPB_HUMAN	9	COPB1 COPB MSTP026	Coatomer subunit beta (Beta-coat protein) (Beta-COP)	-2.22661	5.9086e-09
FSCN1_HUMAN	3	FSCN1 FAN1 HSN SNL	Fascin (55 kDa actin-bundling protein) (Singed-like protein) (p55)	-2.23545	3.69505e-06
PNPH_HUMAN	6	PNP NP	Purine nucleoside phosphorylase (PNP) (EC 2.4.2.1) (Inosine phosphorylase) (Inosine-guanosine phosphorylase)	-2.23878	1.0736e-09
FRIL_HUMAN	11	FTL	Ferritin light chain (Ferritin L subunit)	-2.25261	1.64737e-14
THIM_HUMAN	4	ACAA2	3-ketoacyl-CoA thiolase, mitochondrial (EC 2.3.1.16) (Acetyl-CoA acyltransferase) (Beta-ketothiolase) (Mitochondrial 3-oxoacyl-CoA thiolase) (T1)	-2.25612	7.8577e-10
THTR_HUMAN	4	TST	Thiosulfate sulfurtransferase (EC 2.8.1.1) (Rhodanese)	-2.26805	1.92126e-07
EST1_HUMAN	15	CES1 CES2 SES1	Liver carboxylesterase 1 (Acyl-coenzyme A:cholesterol acyltransferase) (ACAT) (Brain carboxylesterase hBr1) (Carboxylesterase 1) (CE-1) (hCE-1) (EC 3.1.1.1) (Cocaine carboxylesterase) (Egasyn) (HMSE) (Methylumbelliferyl-acetate deacetylase 1) (EC 3.1.1.56) (Monocyte/macrophage serine esterase) (Retinyl ester hydrolase) (REH) (Serine esterase 1) (Triacylglycerol hydrolase) (TGH)	-2.26992	5.65993e-10
NHRF1_HUMAN	3	SLC9A3R1 NHERF NHERF1	Na(+)/H(+) exchange regulatory cofactor NHE-RF1 (NHERF-1) (Ezrin-radixin-moesin-binding phosphoprotein 50) (EBP50) (Regulatory cofactor of Na(+)/H(+) exchanger) (Sodium-hydrogen exchanger regulatory factor 1) (Solute carrier family 9 isoform A3 regulatory factor 1)	-2.27579	3.5277e-06
BPI_HUMAN	3	BPI	Bactericidal permeability-increasing protein (BPI) (CAP 57)	-2.28522	1.55548e-06
SQOR_HUMAN	13	SQOR SQRDL CGI-44	Sulfide:quinone oxidoreductase, mitochondrial (SQOR) (EC 1.8.5.-) (Sulfide dehydrogenase-like) (Sulfide quinone oxidoreductase)	-2.29379	7.26283e-13
MYO6_HUMAN	3	MYO6 KIAA0389	Unconventional myosin-VI (Unconventional myosin-6)	-2.29869	1.01651e-05
SAC1_HUMAN	8	SACM1L KIAA0851	Phosphatidylinositide phosphatase SAC1 (EC 3.1.3.-) (Suppressor of actin mutations 1-like protein)	-2.31554	1.22542e-11
MACF1_HUMAN	27	MACF1 ABP620 ACF7 KIAA0465 KIAA1251	Microtubule-actin cross-linking factor 1, isoforms 1/2/3/5 (620 kDa actin-binding protein) (ABP620) (Actin cross-linking family protein 7) (Macrophin-1) (Trabeculin-alpha)	-2.33383	1.64737e-14
A0A0S2Z4G4_HUMAN	7			-2.35518	0.000166668
GSTK1_HUMAN	4	GSTK1 HDCMD47P	Glutathione S-transferase kappa 1 (EC 2.5.1.18) (GST 13-13) (GST class-kappa) (GSTK1-1) (hGSTK1) (Glutathione S-transferase subunit 13)	-2.36213	9.66386e-08
AGR2_HUMAN	3	AGR2 AG2 UNQ515/PRO1030	Anterior gradient protein 2 homolog (AG-2) (hAG-2) (HPC8) (Secreted cement gland protein XAG-2 homolog)	-2.36354	1.92231e-06
NGAL_HUMAN	7	LCN2 HNL NGAL	Neutrophil gelatinase-associated lipocalin (NGAL) (25 kDa alpha-2-microglobulin-related subunit of MMP-9) (Lipocalin-2) (Oncogene 24p3) (Siderocalin) (p25)	-2.41415	4.77916e-14
COR1A_HUMAN	12	CORO1A CORO1	Coronin-1A (Coronin-like protein A) (Clipin-A) (Coronin-like protein p57) (Tryptophan aspartate-containing coat protein) (TACO)	-2.42581	1.64737e-14
SODM_HUMAN	7	SOD2	Superoxide dismutase [Mn], mitochondrial (EC 1.15.1.1)	-2.46332	4.29692e-09
CATH_HUMAN	5	CTSH CPSB	Pro-cathepsin H [Cleaved into: Cathepsin H mini chain; Cathepsin H (EC 3.4.22.16); Cathepsin H heavy chain; Cathepsin H light chain]	-2.46822	8.80934e-10
CAVN2_HUMAN	13	CAVIN2 SDPR	Caveolae-associated protein 2 (Cavin-2) (PS-p68) (Phosphatidylserine-binding protein) (Serum deprivation-response protein)	-2.49533	2.31844e-12
CAH2_HUMAN	7	CA2	Carbonic anhydrase 2 (EC 4.2.1.1) (Carbonate dehydratase II) (Carbonic anhydrase C) (CAC) (Carbonic anhydrase II) (CA-II)	-2.53096	2.11701e-10
SCEL_HUMAN	4	SCEL	Sciellin	-2.54492	9.54137e-08
PERF_HUMAN	3	PRF1 PFP	Perforin-1 (P1) (Cytolysin) (Lymphocyte pore-forming protein) (PFP)	-2.55342	1.81272e-06
S10A9_HUMAN	12	S100A9 CAGB CFAG MRP14	Protein S100-A9 (Calgranulin-B) (Calprotectin L1H subunit) (Leukocyte L1 complex heavy chain) (Migration inhibitory factor-related protein 14) (MRP-14) (p14) (S100 calcium-binding protein A9)	-2.5575	1.64737e-14
CAPG_HUMAN	12	CAPG AFCP MCP	Macrophage-capping protein (Actin regulatory protein CAP-G)	-2.57432	4.61345e-13
2B11_HUMAN	9	HLA-DRB1	HLA class II histocompatibility antigen, DRB1-1 beta chain (MHC class II antigen DRB1*1) (DR-1) (DR1)	-2.57821	0.0458002
PLD3_HUMAN	7	PLD3	Phospholipase D3 (PLD 3) (EC 3.1.4.4) (Choline phosphatase 3) (HindIII K4L homolog) (Hu-K4) (Phosphatidylcholine-hydrolyzing phospholipase D3)	-2.58198	2.5383e-11
NHRF2_HUMAN	5	SLC9A3R2 NHERF2	Na(+)/H(+) exchange regulatory cofactor NHE-RF2 (NHERF-2) (NHE3 kinase A regulatory protein E3KARP) (SRY-interacting protein 1) (SIP-1) (Sodium-hydrogen exchanger regulatory factor 2) (Solute carrier family 9 isoform A3 regulatory factor 2) (Tyrosine kinase activator protein 1) (TKA-1)	-2.62421	9.4771e-11
PSPB_HUMAN	5	SFTPB SFTP3	Pulmonary surfactant-associated protein B (SP-B) (18 kDa pulmonary-surfactant protein) (6 kDa protein) (Pulmonary surfactant-associated proteolipid SPL(Phe))	-2.62935	1.50955e-10
SYWC_HUMAN	12	WARS IFI53 WRS	Tryptophan--tRNA ligase, cytoplasmic (EC 6.1.1.2) (Interferon-induced protein 53) (IFP53) (Tryptophanyl-tRNA synthetase) (TrpRS) (hWRS) [Cleaved into: T1-TrpRS; T2-TrpRS]	-2.64767	3.13978e-14
S10A8_HUMAN	6	S100A8 CAGA CFAG MRP8	Protein S100-A8 (Calgranulin-A) (Calprotectin L1L subunit) (Cystic fibrosis antigen) (CFAG) (Leukocyte L1 complex light chain) (Migration inhibitory factor-related protein 8) (MRP-8) (p8) (S100 calcium-binding protein A8) (Urinary stone protein band A)	-2.66828	5.68955e-09
HG2A_HUMAN	3	CD74 DHLAG	HLA class II histocompatibility antigen gamma chain (HLA-DR antigens-associated invariant chain) (Ia antigen-associated invariant chain) (Ii) (p33) (CD antigen CD74)	-2.6894	3.26689e-10
PLSL_HUMAN	17	LCP1 PLS2	Plastin-2 (L-plastin) (LC64P) (Lymphocyte cytosolic protein 1) (LCP-1)	-2.69008	2.38477e-13
KAD2_HUMAN	6	AK2 ADK2	Adenylate kinase 2, mitochondrial (AK 2) (EC 2.7.4.3) (ATP-AMP transphosphorylase 2) (ATP:AMP phosphotransferase) (Adenylate monophosphate kinase) [Cleaved into: Adenylate kinase 2, mitochondrial, N-terminally processed]	-2.7006	6.93275e-10
FAS_HUMAN	42	FASN FAS	Fatty acid synthase (EC 2.3.1.85) [Includes: [Acyl-carrier-protein] S-acetyltransferase (EC 2.3.1.38); [Acyl-carrier-protein] S-malonyltransferase (EC 2.3.1.39); 3-oxoacyl-[acyl-carrier-protein] synthase (EC 2.3.1.41); 3-oxoacyl-[acyl-carrier-protein] reductase (EC 1.1.1.100); 3-hydroxyacyl-[acyl-carrier-protein] dehydratase (EC 4.2.1.59); Enoyl-[acyl-carrier-protein] reductase (EC 1.3.1.39); Ole…	-2.70549	1.64737e-14
MBOA5_HUMAN	3	LPCAT3 MBOAT5 OACT5	Lysophospholipid acyltransferase 5 (LPLAT 5) (EC 2.3.1.-) (1-acylglycerophosphocholine O-acyltransferase) (EC 2.3.1.23) (1-acylglycerophosphoserine O-acyltransferase) (EC 2.3.1.n6) (Lysophosphatidylcholine acyltransferase) (LPCAT) (Lyso-PC acyltransferase) (Lysophosphatidylcholine acyltransferase 3) (Lyso-PC acyltransferase 3) (Lysophosphatidylserine acyltransferase) (LPSAT) (Lyso-PS acyltransfer…	-2.71001	2.17606e-05
RALA_HUMAN	6	RALA RAL	Ras-related protein Ral-A	-2.73377	8.67322e-13
TAP2_HUMAN	4	TAP2 ABCB3 PSF2 RING11 Y1	Antigen peptide transporter 2 (APT2) (ATP-binding cassette sub-family B member 3) (Peptide supply factor 2) (Peptide transporter PSF2) (PSF-2) (Peptide transporter TAP2) (Peptide transporter involved in antigen processing 2) (Really interesting new gene 11 protein)	-2.74228	2.58198e-06
ITB2_HUMAN	6	ITGB2 CD18 MFI7	Integrin beta-2 (Cell surface adhesion glycoproteins LFA-1/CR3/p150,95 subunit beta) (Complement receptor C3 subunit beta) (CD antigen CD18)	-2.7523	7.09172e-11
HYEP_HUMAN	17	EPHX1 EPHX EPOX	Epoxide hydrolase 1 (EC 3.3.2.9) (Epoxide hydratase) (Microsomal epoxide hydrolase) (mEH)	-2.77743	1.64737e-14
MUC1_HUMAN	3	MUC1 PUM	Mucin-1 (MUC-1) (Breast carcinoma-associated antigen DF3) (Cancer antigen 15-3) (CA 15-3) (Carcinoma-associated mucin) (Episialin) (H23AG) (Krebs von den Lungen-6) (KL-6) (PEMT) (Peanut-reactive urinary mucin) (PUM) (Polymorphic epithelial mucin) (PEM) (Tumor-associated epithelial membrane antigen) (EMA) (Tumor-associated mucin) (CD antigen CD227) [Cleaved into: Mucin-1 subunit alpha (MUC1-NT) (M…	-2.81733	3.28676e-07
LMNB1_HUMAN	13	LMNB1 LMN2 LMNB	Lamin-B1	-2.83799	1.64737e-14
VPP3_HUMAN	5	TCIRG1 ATP6N1C ATP6V0A3	V-type proton ATPase 116 kDa subunit a isoform 3 (V-ATPase 116 kDa isoform a3) (Osteoclastic proton pump 116 kDa subunit) (OC-116 kDa) (OC116) (T-cell immune regulator 1) (T-cell immune response cDNA7 protein) (TIRC7) (Vacuolar proton translocating ATPase 116 kDa subunit a isoform 3)	-2.8974	1.16285e-10
ITAM_HUMAN	5	ITGAM CD11B CR3A	Integrin alpha-M (CD11 antigen-like family member B) (CR-3 alpha chain) (Cell surface glycoprotein MAC-1 subunit alpha) (Leukocyte adhesion receptor MO1) (Neutrophil adherence receptor) (CD antigen CD11b)	-2.91061	2.49207e-13
THIK_HUMAN	4	ACAA1 ACAA PTHIO	3-ketoacyl-CoA thiolase, peroxisomal (EC 2.3.1.16) (Acetyl-CoA acyltransferase) (Beta-ketothiolase) (Peroxisomal 3-oxoacyl-CoA thiolase)	-2.92954	5.30309e-14
ANXA3_HUMAN	14	ANXA3 ANX3	Annexin A3 (35-alpha calcimedin) (Annexin III) (Annexin-3) (Inositol 1,2-cyclic phosphate 2-phosphohydrolase) (Lipocortin III) (Placental anticoagulant protein III) (PAP-III)	-2.93224	1.64737e-14
TAP1_HUMAN	4	TAP1 ABCB2 PSF1 RING4 Y3	Antigen peptide transporter 1 (APT1) (ATP-binding cassette sub-family B member 2) (Peptide supply factor 1) (Peptide transporter PSF1) (PSF-1) (Peptide transporter TAP1) (Peptide transporter involved in antigen processing 1) (Really interesting new gene 4 protein)	-2.93246	1.48026e-09
PRTN3_HUMAN	4	PRTN3 MBN	Myeloblastin (EC 3.4.21.76) (AGP7) (C-ANCA antigen) (Leukocyte proteinase 3) (PR-3) (PR3) (Neutrophil proteinase 4) (NP-4) (P29) (Wegener autoantigen)	-2.9624	1.88751e-09
PERM_HUMAN	18	MPO	Myeloperoxidase (MPO) (EC 1.11.2.2) [Cleaved into: Myeloperoxidase; 89 kDa myeloperoxidase; 84 kDa myeloperoxidase; Myeloperoxidase light chain; Myeloperoxidase heavy chain]	-2.97244	1.64737e-14
HXK3_HUMAN	4	HK3	Hexokinase-3 (EC 2.7.1.1) (Hexokinase type III) (HK III)	-2.98881	1.14235e-10
CO6A6_HUMAN	9	COL6A6	Collagen alpha-6(VI) chain	-3.0086	1.64737e-14
LRC15_HUMAN	4	LRRC15 LIB	Leucine-rich repeat-containing protein 15 (Leucine-rich repeat protein induced by beta-amyloid homolog) (hLib)	-3.09316	1.99623e-10
MYO1G_HUMAN	6	MYO1G HA2	Unconventional myosin-Ig [Cleaved into: Minor histocompatibility antigen HA-2 (mHag HA-2)]	-3.10717	6.56826e-12
MYO1B_HUMAN	11	MYO1B	Unconventional myosin-Ib (MYH-1c) (Myosin I alpha) (MMI-alpha) (MMIa)	-3.11625	1.64737e-14
EVL_HUMAN	3	EVL RNB6	Ena/VASP-like protein (Ena/vasodilator-stimulated phosphoprotein-like)	-3.12323	1.78881e-07
CEAM6_HUMAN	4	CEACAM6 NCA	Carcinoembryonic antigen-related cell adhesion molecule 6 (Non-specific crossreacting antigen) (Normal cross-reacting antigen) (CD antigen CD66c)	-3.13763	1.55898e-10
SUCB2_HUMAN	6	SUCLG2	Succinate--CoA ligase [GDP-forming] subunit beta, mitochondrial (EC 6.2.1.4) (GTP-specific succinyl-CoA synthetase subunit beta) (G-SCS) (GTPSCS) (Succinyl-CoA synthetase beta-G chain) (SCS-betaG)	-3.14848	1.46385e-11
TRFL_HUMAN	17	LTF GIG12 LF	Lactotransferrin (Lactoferrin) (EC 3.4.21.-) (Growth-inhibiting protein 12) (Talalactoferrin) [Cleaved into: Lactoferricin-H (Lfcin-H); Kaliocin-1; Lactoferroxin-A; Lactoferroxin-B; Lactoferroxin-C]	-3.17387	1.64737e-14
K1H1_HUMAN	10	KRT31 HHA1 HKA1 KRTHA1	Keratin, type I cuticular Ha1 (Hair keratin, type I Ha1) (Keratin-31) (K31)	-3.18839	5.69675e-07
PRAX_HUMAN	12	PRX KIAA1620	Periaxin	-3.20739	1.64737e-14
PGDH_HUMAN	3	HPGD PGDH1 SDR36C1	15-hydroxyprostaglandin dehydrogenase [NAD(+)] (15-PGDH) (EC 1.1.1.141) (Prostaglandin dehydrogenase 1) (Short chain dehydrogenase/reductase family 36C member 1)	-3.30361	1.48478e-09
KT33B_HUMAN	4	KRT33B HHA3-II HKA3B KRTHA3B	Keratin, type I cuticular Ha3-II (Hair keratin, type I Ha3-II) (Keratin-33B) (K33B)	-3.34089	1.64737e-14
NLTP_HUMAN	3	SCP2	Non-specific lipid-transfer protein (NSL-TP) (EC 2.3.1.176) (Propanoyl-CoA C-acyltransferase) (SCP-chi) (SCPX) (Sterol carrier protein 2) (SCP-2) (Sterol carrier protein X) (SCP-X)	-3.36104	1.17416e-12
A0A024QZP2_HUMAN	10			-3.43921	2.22008e-08
NCEH1_HUMAN	3	NCEH1 AADACL1 KIAA1363	Neutral cholesterol ester hydrolase 1 (NCEH) (EC 3.1.1.-) (Arylacetamide deacetylase-like 1)	-3.45629	1.66041e-12
LMO7_HUMAN	15	LMO7 FBX20 FBXO20 KIAA0858	LIM domain only protein 7 (LMO-7) (F-box only protein 20) (LOMP)	-3.46002	1.64737e-14
SARG_HUMAN	7	SARG C1orf116	Specifically androgen-regulated gene protein	-3.46502	1.64737e-14
DHB4_HUMAN	21	HSD17B4 EDH17B4 SDR8C1	Peroxisomal multifunctional enzyme type 2 (MFE-2) (17-beta-hydroxysteroid dehydrogenase 4) (17-beta-HSD 4) (D-bifunctional protein) (DBP) (Multifunctional protein 2) (MPF-2) (Short chain dehydrogenase/reductase family 8C member 1) [Cleaved into: (3R)-hydroxyacyl-CoA dehydrogenase (EC 1.1.1.n12); Enoyl-CoA hydratase 2 (EC 4.2.1.107) (EC 4.2.1.119) (3-alpha,7-alpha,12-alpha-trihydroxy-5-beta-choles…	-3.4689	1.64737e-14
MNDA_HUMAN	4	MNDA	Myeloid cell nuclear differentiation antigen	-3.49933	1.46385e-11
CYB5_HUMAN	5	CYB5A CYB5	Cytochrome b5 (Microsomal cytochrome b5 type A) (MCB5)	-3.50234	1.81829e-11
ABCD3_HUMAN	5	ABCD3 PMP70 PXMP1	ATP-binding cassette sub-family D member 3 (70 kDa peroxisomal membrane protein) (PMP70)	-3.53183	2.66839e-13
KRT85_HUMAN	6	KRT85 KRTHB5	Keratin, type II cuticular Hb5 (Hair keratin K2.12) (Keratin-85) (K85) (Type II hair keratin Hb5) (Type-II keratin Kb25)	-3.53598	1.8e-14
KRT84_HUMAN	11	KRT84 KRTHB4	Keratin, type II cuticular Hb4 (Keratin-84) (K84) (Type II hair keratin Hb4) (Type-II keratin Kb24)	-3.58189	1.64737e-14
MYH14_HUMAN	34	MYH14 KIAA2034 FP17425	Myosin-14 (Myosin heavy chain 14) (Myosin heavy chain, non-muscle IIc) (Non-muscle myosin heavy chain IIc) (NMHC II-C)	-3.5928	1.64737e-14
MMP9_HUMAN	7	MMP9 CLG4B	Matrix metalloproteinase-9 (MMP-9) (EC 3.4.24.35) (92 kDa gelatinase) (92 kDa type IV collagenase) (Gelatinase B) (GELB) [Cleaved into: 67 kDa matrix metalloproteinase-9; 82 kDa matrix metalloproteinase-9]	-3.59367	1.8e-14
EVPL_HUMAN	15	EVPL	Envoplakin (210 kDa cornified envelope precursor protein) (210 kDa paraneoplastic pemphigus antigen) (p210)	-3.61081	1.64737e-14
K2C8_HUMAN	37	KRT8 CYK8	Keratin, type II cytoskeletal 8 (Cytokeratin-8) (CK-8) (Keratin-8) (K8) (Type-II keratin Kb8)	-3.66308	1.64737e-14
ICAM1_HUMAN	4	ICAM1	Intercellular adhesion molecule 1 (ICAM-1) (Major group rhinovirus receptor) (CD antigen CD54)	-3.66572	5.19179e-13
NAPSA_HUMAN	5	NAPSA NAP1 NAPA	Napsin-A (EC 3.4.23.-) (Aspartyl protease 4) (ASP4) (Asp 4) (Napsin-1) (TA01/TA02)	-3.72971	1.08707e-09
K1C19_HUMAN	28	KRT19	Keratin, type I cytoskeletal 19 (Cytokeratin-19) (CK-19) (Keratin-19) (K19)	-3.75316	4.16648e-05
PCAT1_HUMAN	6	LPCAT1 AYTL2 PFAAP3	Lysophosphatidylcholine acyltransferase 1 (LPC acyltransferase 1) (LPCAT-1) (LysoPC acyltransferase 1) (EC 2.3.1.23) (1-acylglycerophosphocholine O-acyltransferase) (1-alkylglycerophosphocholine O-acetyltransferase) (EC 2.3.1.67) (Acetyl-CoA:lyso-platelet-activating factor acetyltransferase) (Acetyl-CoA:lyso-PAF acetyltransferase) (Lyso-PAF acetyltransferase) (LysoPAFAT) (Acyltransferase-like 2) …	-3.80256	1.64737e-14
K1C18_HUMAN	27	KRT18 CYK18 PIG46	Keratin, type I cytoskeletal 18 (Cell proliferation-inducing gene 46 protein) (Cytokeratin-18) (CK-18) (Keratin-18) (K18)	-3.90101	1.64737e-14
K2C7_HUMAN	29	KRT7 SCL	Keratin, type II cytoskeletal 7 (Cytokeratin-7) (CK-7) (Keratin-7) (K7) (Sarcolectin) (Type-II keratin Kb7)	-4.12962	1.64737e-14
ABCA3_HUMAN	18	ABCA3 ABC3	ATP-binding cassette sub-family A member 3 (ABC-C transporter) (ATP-binding cassette transporter 3) (ATP-binding cassette 3)	-4.19736	1.64737e-14
RAGE_HUMAN	5	AGER RAGE	Advanced glycosylation end product-specific receptor (Receptor for advanced glycosylation end products)	-4.24175	7.51836e-14
AQP4_HUMAN	5	AQP4	Aquaporin-4 (AQP-4) (Mercurial-insensitive water channel) (MIWC) (WCH4)	-4.32635	1.64737e-14
AMPE_HUMAN	3	ENPEP	Glutamyl aminopeptidase (EAP) (EC 3.4.11.7) (Aminopeptidase A) (AP-A) (Differentiation antigen gp160) (CD antigen CD249)	-4.37483	1.04355e-09
ACSL5_HUMAN	4	ACSL5 ACS5 FACL5 UNQ633/PRO1250	Long-chain-fatty-acid--CoA ligase 5 (EC 6.2.1.3) (Long-chain acyl-CoA synthetase 5) (LACS 5)	-4.50818	6.10907e-13
CAH4_HUMAN	4	CA4	Carbonic anhydrase 4 (EC 4.2.1.1) (Carbonate dehydratase IV) (Carbonic anhydrase IV) (CA-IV)	-5.11131	1.8e-14
